# Supplementary material for: Transcriptome profiling analysis reveals key genes of different coat color in sheep skin
Source: PeerJ. 2019 Nov 21;7:e8077. doi: 10.7717/peerj.8077 (PMC6875393; doi:10.7717/peerj.8077)
Supplement: Supplemental Information 9 [file peerj-07-8077-s009.xlsx]

## Sheet: ref_trans_full_table
#ID	gene_name	B1_FPKM	B1_count	B2_FPKM	B2_count	B3_FPKM	B3_count	G1_FPKM	G1_count	G2_FPKM	G2_count	G3_FPKM	G3_count	R1_FPKM	R1_count	R2_FPKM	R2_count	R3_FPKM	R3_count	W1_FPKM	W1_count	W2_FPKM	W2_count	W3_FPKM	W3_count	B1_B2_B3_vs_G1_G2_G3_DESeq2_FDR	B1_B2_B3_vs_G1_G2_G3_DESeq2_log2FC	B1_B2_B3_vs_G1_G2_G3_DESeq2_(FDR_0.05_FC_2)_regulated	B1_B2_B3_vs_R1_R2_R3_DESeq2_FDR	B1_B2_B3_vs_R1_R2_R3_DESeq2_log2FC	B1_B2_B3_vs_R1_R2_R3_DESeq2_(FDR_0.05_FC_2)_regulated	B1_B2_B3_vs_W1_W2_W3_DESeq2_FDR	B1_B2_B3_vs_W1_W2_W3_DESeq2_log2FC	B1_B2_B3_vs_W1_W2_W3_DESeq2_(FDR_0.05_FC_2)_regulated	G1_G2_G3_vs_R1_R2_R3_DESeq2_FDR	G1_G2_G3_vs_R1_R2_R3_DESeq2_log2FC	G1_G2_G3_vs_R1_R2_R3_DESeq2_(FDR_0.05_FC_2)_regulated	W1_W2_W3_vs_G1_G2_G3_DESeq2_FDR	W1_W2_W3_vs_G1_G2_G3_DESeq2_log2FC	W1_W2_W3_vs_G1_G2_G3_DESeq2_(FDR_0.05_FC_2)_regulated	W1_W2_W3_vs_R1_R2_R3_DESeq2_FDR	W1_W2_W3_vs_R1_R2_R3_DESeq2_log2FC	W1_W2_W3_vs_R1_R2_R3_DESeq2_(FDR_0.05_FC_2)_regulated	COG_class	COG_class_annotation	GO_annotation	KEGG_annotation	KEGG_pathway_annotation	KOG_class
Ovis_aries_newGene_12614	--	0	0	0.028206	1	0.172725	4	0	0	0	0	0.062945	2	0	0	0	0	0.345021	4	0.311933	7	0	0	0.124965	3	0.932615	-0.0342289	normal	0.940118	0.0435579	normal	0.938909	0.0515894	normal	0.835927	0.131687	normal	0.895075	-0.0778224	normal	0.957681	-0.0316322	normal	--	--	Molecular Function: nucleic acid binding (GO:0003676);; Molecular Function: RNA-directed DNA polymerase activity (GO:0003964);; Cellular Component: intracellular (GO:0005622);; Cellular Component: fascia adherens (GO:0005916);; Biological Process: RNA-dependent DNA biosynthetic process (GO:0006278);; Biological Process: regulation of transcription, DNA-templated (GO:0006355);; Molecular Function:…	--	--	--
gene18975	CCDC82	6.67455	1513	8.45907	2283	8.20278	2883	4.75182	1362	7.0771	1487	6.91825	2132	9.32392	1504	7.71985	1222	9.13892	1332	7.64517	2714	8.35076	2234	7.92686	2135	0.333691	-0.296492	normal	0.806541	0.0840027	normal	0.950119	0.0458145	normal	0.0931395	0.392347	normal	0.143017	-0.352521	normal	0.92563	0.0328939	normal	--	--	--	--	--	[S]
Ovis_aries_newGene_9233	--	0.313246	74	0.18893	57	0.22371	81	0.254206	73	0.279827	66	0.309227	105	0.343789	58	0.217898	38	0.244735	43	0.357871	126	0.2885	85	0.249429	71	0.840366	0.179637	normal	0.89642	0.113757	normal	0.889302	0.203772	normal	0.910374	-0.0965485	normal	0.981102	-0.0470816	normal	0.861437	-0.134866	normal	--	--	Biological Process: metabolic process (GO:0008152);; Cellular Component: intracellular part (GO:0044424);;	K11433|3.42615e-94|pps:106635114|K11433 histone-lysine N-methyltransferase SETMAR [EC:2.1.1.43] | (RefSeq) histone-lysine N-methyltransferase SETMAR	Lysine degradation (ko00310)	--
gene12627	SYNCRIP	26.1795	8364	23.9255	9563	22.2	11321	28.4532	10884	30.3593	9352	24.3232	10611	30.5808	6331	32.1365	6333	25.5975	5441	25.2809	11858	25.9354	9606	23.7076	8928	0.702952	0.16168	normal	0.779225	0.0773296	normal	0.981531	-0.0164239	normal	0.74548	-0.0944517	normal	0.704625	0.172116	normal	0.740546	0.090486	normal	[J]	Translation, ribosomal structure and biogenesis	Molecular Function: nucleotide binding (GO:0000166);; Molecular Function: poly(A) binding (GO:0008143);; Biological Process: negative regulation of translation (GO:0017148);; Biological Process: CRD-mediated mRNA stabilization (GO:0070934);; Cellular Component: CRD-mediated mRNA stability complex (GO:0070937);; Cellular Component: catalytic step 2 spliceosome (GO:0071013);; Cellular Component: hi…	K13160|0|ptr:462866|K13160 heterogeneous nuclear ribonucleoprotein Q | (RefSeq) SYNCRIP; synaptotagmin binding cytoplasmic RNA interacting protein	--	[A]
Ovis_aries_newGene_43145	--	0.238688	46	0.644783	141	0.38232	115	0.833237	209	1.01476	190	0.3841	107	0.059441	7	0.828179	114	0.269773	44	0.308155	90	0.434196	96	0.168811	35	0.356279	0.554251	normal	0.981789	-0.0279424	normal	0.889302	-0.242941	normal	0.48838	-0.659177	normal	0.108096	0.787669	normal	0.833762	0.205215	normal	--	--	Biological Process: detection of chemical stimulus involved in sensory perception of bitter taste (GO:0001580);; Molecular Function: G-protein coupled receptor activity (GO:0004930);; Molecular Function: binding (GO:0005488);; Biological Process: lipid metabolic process (GO:0006629);; Biological Process: G-protein coupled receptor signaling pathway (GO:0007186);; Cellular Component: integral comp…	K08474|4.91082e-26|bta:664647|K08474 taste receptor type 2 | (RefSeq) T2R65A; bitter taste receptor Bota-T2R65A	--	--
gene12727	IL22RA2	0.063664	20	0.436629	65	0.33458	100	0.09562	35	0.032597	10	0.012904	7	0.44698	86	0.263328	50	0.570246	64	0.119128	37	0.154129	38	0.093482	32	0.366149	-0.52969	normal	0.267336	0.70404	normal	0.750307	-0.346507	normal	0.00395141	1.80869	up	0.84788	-0.294824	normal	0.00090878	1.38264	up	--	--	Cellular Component: cytosol (GO:0005829);; Molecular Function: interleukin-22 binding (GO:0042017);; Molecular Function: interleukin-22 receptor activity (GO:0042018);; Biological Process: regulation of tyrosine phosphorylation of STAT protein (GO:0042516);;	K05139|6.3551e-90|oas:101121781|K05139 interleukin 22 receptor alpha 2 | (RefSeq) IL22RA2; interleukin 22 receptor subunit alpha 2	Cytokine-cytokine receptor interaction (ko04060);; Jak-STAT signaling pathway (ko04630)	--
gene14582	C1QBP	45.7703	2756	42.6208	3268	41.7473	3873	45.9886	3366	46.7057	2829	44.4658	3859	40.0719	1733	40.0069	1786	35.6929	1576	45.793	4136	43.8656	3306	46.0757	3369	0.785135	0.102605	normal	0.374587	-0.179576	normal	0.889753	0.0604478	normal	0.0789844	-0.289937	normal	0.956418	0.0355434	normal	0.151284	-0.245047	normal	--	--	Biological Process: negative regulation of transcription from RNA polymerase II promoter (GO:0000122);; Molecular Function: complement component C1q binding (GO:0001849);; Molecular Function: transcription corepressor activity (GO:0003714);; Molecular Function: mRNA binding (GO:0003729);; Molecular Function: hyaluronic acid binding (GO:0005540);; Cellular Component: extracellular region (GO:00055…	K15414|0|oas:101106021|K15414 complement component 1 Q subcomponent-binding protein, mitochondrial | (RefSeq) C1QBP; complement C1q binding protein	Herpes simplex infection (ko05168)	[V]
Ovis_aries_newGene_62827	--	0.011275	2	0.120077	25	0.057152	15	0.170352	33	0.159433	26	0.230327	53	0.16219	19	0.527583	63	0.127856	15	0.184136	44	0.44715	90	0.141264	28	0.39526	0.513452	normal	0.180569	0.880384	normal	0.318234	0.504339	normal	0.717068	0.358436	normal	0.895075	-0.210049	normal	0.969496	0.0418182	normal	--	--	Biological Process: nucleotide-excision repair, DNA damage recognition (GO:0000715);; Biological Process: positive regulation of cytokine-mediated signaling pathway (GO:0001961);; Molecular Function: damaged DNA binding (GO:0003684);; Molecular Function: single-stranded DNA binding (GO:0003697);; Cellular Component: nucleolus (GO:0005730);; Cellular Component: plasma membrane (GO:0005886);; Biolo…	--	--	--
gene4848	LACTBL1	0	0	0	0	0	0	0	0	0	0	0	0	0	0	0	0	0	0	0	0	0	0	0	0	--	--	--	--	--	--	--	--	--	--	--	--	--	--	--	--	--	--	[V]	Defense mechanisms	--	--	--	--
gene26915	CFAP97	8.12744	2491	7.67164	2992	8.73418	4122	5.84772	2178	7.34728	2265	6.39409	2823	7.24244	1594	3.63639	826	8.51429	1912	6.96041	3198	7.21472	2767	6.60729	2458	0.178882	-0.285596	normal	0.546499	-0.31954	normal	0.276755	-0.229234	normal	0.934706	-0.057913	normal	0.920556	-0.06409	normal	0.86401	-0.109074	normal	--	--	--	--	--	--
gene25696	GLIS2	7.76458	1956	5.6151	1822	5.77459	2240	3.79784	1148	4.99162	1266	4.89129	1767	4.90332	902	3.74291	701	4.47692	831	4.75852	1793	4.45618	1389	4.34308	1326	0.148695	-0.427163	normal	0.0420725	-0.525436	normal	0.0598033	-0.461984	normal	0.827385	-0.083148	normal	0.977899	0.0295045	normal	0.905937	-0.0460688	normal	[R]	General function prediction only	Biological Process: negative regulation of transcription from RNA polymerase II promoter (GO:0000122);; Molecular Function: transcriptional activator activity, RNA polymerase II core promoter proximal region sequence-specific binding (GO:0001077);; Cellular Component: nuclear speck (GO:0016607);; Biological Process: negative regulation of sequence-specific DNA binding transcription factor activit…	K09233|9.94665e-175|oas:101102282|K09233 zinc finger protein GLIS2 | (RefSeq) GLIS2; GLIS family zinc finger 2	--	[R]
Ovis_aries_newGene_22394	--	0	0	0.389206	45	0	0	0	0	0	0	0	0	0	0	0	0	0	0	0	0	0.002319	1	0	0	0.769088	-0.123696	normal	0.673745	-0.203314	normal	0.857649	-0.104675	normal	--	--	--	--	--	--	--	--	--	--	--	--	--	--	--
gene23800	LOC101121468	0	0	0	0	0	0	0	0	0	0	0	0	0	0	0	0	0	0	0	0	0	0	0	0	--	--	--	--	--	--	--	--	--	--	--	--	--	--	--	--	--	--	--	--	Cellular Component: intracellular (GO:0005622);; Molecular Function: zinc ion binding (GO:0008270);;	K12019|0|oas:101121468|K12019 tripartite motif-containing protein 43/48/49/64/77 | (RefSeq) tripartite motif-containing protein 64-like	--	[O]
gene23361	LOC105603790	1.10937	691	1.49368	1205	1.72083	1372	1.79368	1212	1.36524	786	1.40944	1303	0.999737	456	2.91436	892	1.68666	758	1.13187	868	1.63966	966	1.58979	882	0.863356	0.107126	normal	0.780861	0.155371	normal	0.694249	-0.24715	normal	0.949094	0.0431644	normal	0.39679	0.352418	normal	0.359308	0.404065	normal	[R]	General function prediction only	Molecular Function: nucleic acid binding (GO:0003676);; Molecular Function: transcription factor activity, sequence-specific DNA binding (GO:0003700);; Cellular Component: nucleus (GO:0005634);; Biological Process: transcription, DNA-templated (GO:0006351);; Molecular Function: metal ion binding (GO:0046872);;	K09229|0|oas:105603790|K09229 KRAB and SCAN domains-containing zinc finger protein | (RefSeq) ZKSCAN4, ZNF187, ZSCAN26; uncharacterized LOC105603790	--	[R]
gene14235	HSF5	0.943527	246	1.01845	335	1.08434	431	1.2105	259	0.812351	210	0.87153	326	1.78543	332	1.48804	288	1.32109	251	1.24201	443	1.24533	387	1.02829	325	0.612637	-0.23179	normal	0.0363264	0.549714	normal	0.889302	0.130789	normal	0.0021332	0.798272	normal	0.262267	-0.368975	normal	0.164137	0.408514	normal	--	--	Molecular Function: transcription factor activity, sequence-specific DNA binding (GO:0003700);; Cellular Component: nucleus (GO:0005634);; Biological Process: regulation of transcription, DNA-templated (GO:0006355);; Molecular Function: sequence-specific DNA binding (GO:0043565);;	--	--	--
gene2100	TM4SF19	0.069162	7	0.153837	20	0.112198	17	0.061172	8	0.045773	7	0.051052	7	0.648118	52	0.26414	20	0.266732	21	0.100739	15	0.227806	32	0.113545	14	0.787085	-0.281692	normal	0.0593573	1.11305	normal	0.901729	0.15119	normal	0.00333484	1.86634	up	0.58719	-0.434187	normal	0.224362	0.807648	normal	--	--	Cellular Component: integral component of membrane (GO:0016021);;	--	--	--
gene20525	PAPD7	6.65527	1650	9.56188	2466	8.9707	2775	5.81218	1817	8.86017	1701	8.41381	2544	9.36216	1254	9.88083	1352	9.27506	1170	9.24212	2938	8.80093	2277	8.73937	2134	0.839625	-0.0899273	normal	0.799548	-0.0734873	normal	0.958104	0.0377438	normal	0.96853	0.0137723	normal	0.796659	-0.134687	normal	0.668632	-0.11656	normal	--	--	Cellular Component: nucleus (GO:0005634);; Molecular Function: nucleotidyltransferase activity (GO:0016779);; Biological Process: response to drug (GO:0042493);;	K03514|0|oas:101106461|K03514 non-canonical poly(A) RNA polymerase PAPD5/7 [EC:2.7.7.19] | (RefSeq) PAPD7; poly(A) RNA polymerase D7, non-canonical	RNA degradation (ko03018)	[L]
gene3119	LOC106990896	0	0	0	0	0	0	0	0	0	0	0	0	0	0	0	0	0	0	0	0	0	0	0	0	--	--	--	--	--	--	--	--	--	--	--	--	--	--	--	--	--	--	--	--	--	--	--	--
gene6258	LOC101113221	17.3016	1771	36.269	4727	30.7658	4852	76.9299	9572	39.9886	4118	2.68266	396	12.1255	892	46.9983	3566	52.7131	3956	8.89242	1366	25.9395	3324	28.1974	3505	0.901807	0.115719	normal	0.787839	0.246768	normal	0.87926	-0.252709	normal	0.957793	-0.0748602	normal	0.895075	0.176955	normal	0.632883	0.44009	normal	--	--	Cellular Component: nuclear chromatin (GO:0000790);; Molecular Function: RNA polymerase II core promoter proximal region sequence-specific DNA binding (GO:0000978);; Molecular Function: transcriptional activator activity, RNA polymerase II core promoter proximal region sequence-specific binding (GO:0001077);; Cellular Component: podosome (GO:0002102);; Molecular Function: RNA binding (GO:0003723)…	K12886|0|bom:102278715|K12886 heterogeneous nuclear ribonucleoprotein K | (RefSeq) HNRNPK; heterogeneous nuclear ribonucleoprotein K	Spliceosome (ko03040);; Herpes simplex infection (ko05168);; Viral carcinogenesis (ko05203);; MicroRNAs in cancer (ko05206)	[AR]
gene19371	HPX	0.022297	2	0.033925	4	0.014225	2	0.044662	5	0.035869	3	0.023721	3	0.038177	3	0.161362	10	0	0	0.028862	4	0.038207	4	0.019604	2	0.921111	0.0843862	normal	0.73244	0.285761	normal	0.982541	0.0289532	normal	0.796415	0.273181	normal	0.976142	0.0497691	normal	0.748521	0.245449	normal	--	--	Biological Process: positive regulation of immunoglobulin production (GO:0002639);; Biological Process: positive regulation of humoral immune response mediated by circulating immunoglobulin (GO:0002925);; Molecular Function: hyalurononglucosaminidase activity (GO:0004415);; Cellular Component: extracellular space (GO:0005615);; Biological Process: transport (GO:0006810);; Biological Process: hemo…	K18977|0|oas:101117872|K18977 hemopexin [EC:3.2.1.35] | (RefSeq) HPX; hemopexin	--	[OW]
Ovis_aries_newGene_5136	--	1.42391	204	2.0663	396	1.5627	365	1.05747	201	1.40732	212	1.31633	282	2.13887	263	2.23177	266	1.52725	190	1.69467	384	0.908367	206	1.35824	270	0.560041	-0.315185	normal	0.468873	0.338946	normal	0.889302	-0.176286	normal	0.0227514	0.70334	normal	0.911394	-0.12707	normal	0.168309	0.534317	normal	--	--	Molecular Function: nucleotide binding (GO:0000166);; Molecular Function: first spliceosomal transesterification activity (GO:0000384);; Biological Process: mRNA splicing, via spliceosome (GO:0000398);; Molecular Function: RNA binding (GO:0003723);; Cellular Component: U2 snRNP (GO:0005686);; Biological Process: mRNA export from nucleus (GO:0006406);; Cellular Component: RES complex (GO:0070274);…	K13107|1.5015e-47|chx:102182858|K13107 RNA-binding motif protein, X-linked 2 | (RefSeq) RBMX2; RNA binding motif protein, X-linked 2	--	[R]
gene2931	MUSK	0.280872	120	0.059708	33	0.190037	125	0.101008	53	0.212339	92	0.063794	40	0.264758	82	0.382813	121	0.755821	237	0.100519	65	0.169506	91	0.074039	39	0.839625	-0.202586	normal	0.136966	0.907777	normal	0.884082	-0.251022	normal	0.00966945	1.47112	up	0.975508	0.0686964	normal	0.00223052	1.4457	up	--		Molecular Function: protein tyrosine kinase activity (GO:0004713);; Molecular Function: ATP binding (GO:0005524);; Cellular Component: plasma membrane (GO:0005886);; Biological Process: regulation of transcription, DNA-templated (GO:0006355);; Biological Process: regulation of synaptic growth at neuromuscular junction (GO:0008582);; Cellular Component: integral component of membrane (GO:0016021);…	K05129|0|oas:101112879|K05129 muscle, skeletal, receptor tyrosine kinase [EC:2.7.10.1] | (RefSeq) MUSK; muscle associated receptor tyrosine kinase	--	[TU]
gene16832	LOC101109111	9.27085	657	34.9116	3162	20.8506	2254	10.992	937	12.5024	897	9.79082	918	14.3138	712	17.9544	931	16.1036	844	9.7392	1035	5.11207	459	6.30174	546	0.172669	-0.660306	normal	0.606183	-0.365901	normal	0.010418	-0.949476	normal	0.0441635	0.503332	normal	0.236317	0.516731	normal	0.000456503	1.04842	up	[Q]	Secondary metabolites biosynthesis, transport and catabolism	Cellular Component: cytoplasm (GO:0005737);; Molecular Function: oxidoreductase activity (GO:0016491);;	K04119|0|oas:101109111|K04119 aldo-keto reductase family 1 member C3 [EC:1.1.1.51 1.1.1.188 1.1.1.213 1.1.1.357] | (RefSeq) dihydrodiol dehydrogenase 3	Steroid hormone biosynthesis (ko00140);; Arachidonic acid metabolism (ko00590);; Ovarian steroidogenesis (ko04913)	[R]
gene23741	LOC101122734	12.978	1055	24.0937	2392	19.374	2462	18.8235	1876	32.6055	2553	51.9037	5693	10.8918	645	8.43525	516	20.9109	1264	53.1978	6056	15.1741	1567	19.6094	1964	0.141043	0.63804	normal	0.510543	-0.395623	normal	0.677051	0.373701	normal	0.00789142	-1.17217	down	0.956263	0.108814	normal	0.123272	-0.819662	normal	--	--	Biological Process: neuron migration (GO:0001764);; Molecular Function: GTPase activity (GO:0003924);; Molecular Function: structural constituent of cytoskeleton (GO:0005200);; Molecular Function: protein binding (GO:0005515);; Molecular Function: GTP binding (GO:0005525);; Cellular Component: cytoplasm (GO:0005737);; Cellular Component: microtubule (GO:0005874);; Cellular Component: plasma membr…	K07375|0|oas:101122734|K07375 tubulin beta | (RefSeq) TUBB2B; tubulin beta-2A chain	Phagosome (ko04145);; Gap junction (ko04540)	[Z]
gene727	LOC101119773	0.730069	109	1.50154	367	1.72376	306	0.72753	145	1.08015	156	0.798416	227	5.3118	740	2.74654	289	1.9276	253	3.77689	1193	2.25596	568	2.71009	659	0.735462	-0.308054	normal	0.0215439	1.14817	up	0.00176299	1.04409	up	9.71753e-05	1.7233	up	1.29627e-11	-1.66557	down	0.970303	-0.0339338	normal	--	--	Molecular Function: GTPase activity (GO:0003924);; Molecular Function: GTP binding (GO:0005525);;	K20899|0|oas:101119773|K20899 guanylate-binding protein 1/3/4/7 | (RefSeq) guanylate-binding protein 4-like	--	[R]
Ovis_aries_newGene_24134	--	0	0	0	0	0.051409	3	0	0	0	0	0	0	0	0	0	0	0	0	0.158921	7	0.126959	5	0	0	0.839625	-0.0558428	normal	0.764522	-0.108331	normal	0.889302	0.0687914	normal	--	--	--	0.868527	-0.108784	normal	0.705509	-0.179307	normal	--	--	--	--	--	--
gene27487	LOC105605675	0	0	0	0	0	0	0	0	0	0	0	0	0	0	0	0	0	0	0	0	0	0	0	0	--	--	--	--	--	--	--	--	--	--	--	--	--	--	--	--	--	--	[K]	Transcription	--	K06099|0|oas:105605675|K06099 cold shock domain protein A | (RefSeq) Y-box-binding protein 3-like	Tight junction (ko04530)	[J]
gene11083	LOC101105412	0	0	0	0	0	0	0.03413	3	0	0	0.028783	3	0	0	0	0	0	0	0.040428	3	0	0	0	0	0.839625	0.0727323	normal	--	--	--	0.889302	0.0446199	normal	0.698355	-0.220375	normal	0.956089	0.0396996	normal	0.765285	-0.104273	normal	--	--	--	K20346|5.57128e-108|oas:101105412|K20346 p24 family protein alpha | (RefSeq) transmembrane emp24 domain-containing protein 11	--	[U]
gene3177	APTX	3.94772	375	4.3638	531	4.15266	613	5.59294	578	5.31986	448	5.4254	647	4.79094	318	7.55429	428	6.38815	412	3.32897	478	4.69678	553	4.11256	487	0.543354	0.218976	normal	0.167579	0.37871	normal	0.981348	-0.0300919	normal	0.694031	0.15292	normal	0.742016	0.233477	normal	0.241733	0.397849	normal	[FGR]	Nucleotide transport and metabolism;; Carbohydrate transport and metabolism;; General function prediction only	Biological Process: single strand break repair (GO:0000012);; Cellular Component: nuclear chromatin (GO:0000790);; Molecular Function: chromatin binding (GO:0003682);; Molecular Function: damaged DNA binding (GO:0003684);; Molecular Function: double-stranded DNA binding (GO:0003690);; Molecular Function: double-stranded RNA binding (GO:0003725);; Cellular Component: nucleoplasm (GO:0005654);; Cel…	K10863|0|phd:102327633|K10863 aprataxin [EC:3.-.-.-] | (RefSeq) APTX; aprataxin	--	[R]
Ovis_aries_newGene_24974	--	0	0	0	0	0.219239	5	0	0	0	0	0	0	0	0	0	0	0	0	0	0	0	0	0	0	0.839625	-0.0606982	normal	0.748952	-0.121498	normal	0.889302	-0.0485709	normal	--	--	--	--	--	--	--	--	--	--	--	--	--	--	--
Ovis_aries_newGene_17593	--	0.305202	9	0.479429	17	0.123814	6	0.313876	11	0.227545	7	0.158823	7	0.531385	11	0.925251	19	0.25954	6	0	0	0	0	0.045157	2	0.941124	-0.0825727	normal	0.663521	0.4171	normal	0.439663	-0.325343	normal	0.470473	0.702234	normal	0.501446	0.33749	normal	0.0547954	1.02805	normal	--	--	--	--	--	--
gene14342	CCT6B	0.049144	5	0.164992	20	0.177572	26	0.203071	24	0.259187	24	0.195345	27	0.060517	5	0.161212	11	0.080845	6	0.20407	29	0.220206	26	0.088201	10	0.771298	0.305218	normal	0.879744	-0.161024	normal	0.939607	0.106957	normal	0.400126	-0.741354	normal	0.910001	0.172988	normal	0.734304	-0.348794	normal	[O]	Posttranslational modification, protein turnover, chaperones	Molecular Function: ATP binding (GO:0005524);; Cellular Component: chaperonin-containing T-complex (GO:0005832);; Biological Process: protein folding (GO:0006457);; Molecular Function: unfolded protein binding (GO:0051082);;	K09498|0|oas:101118966|K09498 T-complex protein 1 subunit zeta | (RefSeq) CCT6B; chaperonin containing TCP1 subunit 6B	--	[O]
gene3843	COL3A1	509.674	139618	190.611	66498	258.368	109069	114.455	38102	191.966	52912	126.065	49774	278.587	54804	525.602	106730	583.818	117259	213.405	87706	268.973	92248	157.849	52519	0.0261809	-0.837615	normal	0.485199	0.430414	normal	0.568898	-0.404013	normal	8.29548e-07	1.53701	up	0.278296	-0.46475	normal	0.00451812	0.973896	normal	--	--	Biological Process: blood vessel development (GO:0001568);; Molecular Function: extracellular matrix structural constituent (GO:0005201);; Cellular Component: collagen type III trimer (GO:0005586);; Biological Process: cell-matrix adhesion (GO:0007160);; Biological Process: transforming growth factor beta receptor signaling pathway (GO:0007179);; Biological Process: integrin-mediated signaling pa…	K19720|8.46717e-152|chx:100860938|K19720 collagen, type III, alpha | (RefSeq) COL3A1; collagen type III alpha 1 chain	Platelet activation (ko04611);; AGE-RAGE signaling pathway in diabetic complications (ko04933);; Protein digestion and absorption (ko04974);; Amoebiasis (ko05146)	[W]
gene15128	CCR10	1.00634	42	1.0532	56	1.17697	76	0.509641	26	0.837193	36	1.05547	64	1.2885	39	0.334216	11	1.6131	50	0.914831	58	0.544821	29	0.664939	34	0.839625	-0.243717	normal	0.999821	0.000320469	normal	0.703136	-0.359729	normal	0.78566	0.277762	normal	0.956418	0.107433	normal	0.721524	0.353418	normal	--	--	Biological Process: chemotaxis (GO:0006935);; Biological Process: immune response (GO:0006955);; Biological Process: G-protein coupled receptor signaling pathway (GO:0007186);; Biological Process: positive regulation of cytosolic calcium ion concentration (GO:0007204);; Cellular Component: integral component of membrane (GO:0016021);; Molecular Function: C-C chemokine receptor activity (GO:001649…	K04185|8.25283e-50|oas:678671|K04185 C-C chemokine receptor type 10 | (RefSeq) CCR10; C-C motif chemokine receptor 10	Cytokine-cytokine receptor interaction (ko04060);; Chemokine signaling pathway (ko04062);; Intestinal immune network for IgA production (ko04672)	--
Ovis_aries_newGene_47427	--	0	0	0	0	0.000457	1	0	0	0	0	0	0	0	0	0.733641	43	0	0	0	0	0.180849	18	0	0	--	--	--	0.546545	0.31043	normal	0.889302	0.0731208	normal	0.4824	0.496735	normal	0.895075	-0.0757553	normal	0.781318	0.134201	normal	--	--	--	--	--	--
gene4276	STAT4	0.507459	71	0.207419	38	0.331667	72	0.206701	36	0.198492	29	0.444094	91	1.32874	131	0.957279	100	0.981557	100	0.467193	99	0.449901	80	0.532257	89	0.914481	-0.125734	normal	0.00235646	1.29473	up	0.847437	0.280854	normal	0.000754368	1.57791	up	0.620692	-0.431326	normal	0.00262072	1.00928	up	--	--	Cellular Component: nuclear chromatin (GO:0000790);; Molecular Function: RNA polymerase II core promoter proximal region sequence-specific DNA binding (GO:0000978);; Molecular Function: RNA polymerase II core promoter sequence-specific DNA binding (GO:0000979);; Molecular Function: transcription factor activity, RNA polymerase II core promoter sequence-specific (GO:0000983);; Biological Process: …	K11222|0|oas:101117562|K11222 signal transducer and activator of transcription 4 | (RefSeq) STAT4; signal transducer and activator of transcription 4	Jak-STAT signaling pathway (ko04630);; Hepatitis B (ko05161);; Inflammatory bowel disease (IBD) (ko05321)	[KT]
gene8940	LOC101114016	0	0	0	0	0	0	0	0	0	0	0	0	0	0	0	0	0	0	0	0	0	0	0	0	--	--	--	--	--	--	--	--	--	--	--	--	--	--	--	--	--	--	--	--	Molecular Function: G-protein coupled receptor activity (GO:0004930);; Molecular Function: olfactory receptor activity (GO:0004984);; Cellular Component: plasma membrane (GO:0005886);; Cellular Component: integral component of membrane (GO:0016021);;	K04257|0|oas:101114016|K04257 olfactory receptor | (RefSeq) olfactory receptor 7A17-like	Olfactory transduction (ko04740)	--
gene16800	VSX1	0	0	0	0	0	0	0	0	0	0	0	0	0	0	0	0	0	0	0	0	0	0	0	0	--	--	--	--	--	--	--	--	--	--	--	--	--	--	--	--	--	--	--	--	Molecular Function: transcription factor activity, sequence-specific DNA binding (GO:0003700);; Cellular Component: nucleus (GO:0005634);; Biological Process: transcription, DNA-templated (GO:0006351);; Biological Process: visual perception (GO:0007601);; Biological Process: neuron maturation (GO:0042551);; Molecular Function: sequence-specific DNA binding (GO:0043565);; Biological Process: respo…	K09335|4.02749e-176|oas:101106277|K09335 visual system homeobox protein 1 | (RefSeq) VSX1; visual system homeobox 1	--	[R]
gene16103	TMEM240	1.50671	60	2.22254	85	1.55175	96	1.25425	61	1.61077	50	1.63329	95	0.640352	19	1.56135	35	1.50067	44	1.49069	89	1.8646	93	2.34229	114	0.906104	-0.117318	normal	0.59081	-0.399361	normal	0.889302	0.189893	normal	0.713586	-0.299835	normal	0.811689	-0.305201	normal	0.34465	-0.592457	normal	--	--	--	--	--	--
Ovis_aries_newGene_36848	--	1.79689	731	2.09985	1087	2.06089	1291	1.65418	818	2.12518	870	2.13268	1250	2.42357	708	1.88202	567	2.18221	651	2.17241	1325	2.54433	1295	1.73029	855	0.9836	0.0140926	normal	0.764522	0.103064	normal	0.902342	0.101603	normal	0.818857	0.0853676	normal	0.926194	-0.0941589	normal	0.985384	-0.00937672	normal	--	--	--	--	--	--
gene12962	RIMS1	0.021155	11	0.004257	3	0.386814	19	0.013731	8	0.044282	22	0.188509	46	0.052867	19	0.028357	10	0.06637	24	0.028737	21	0.025437	16	0.03101	18	0.666372	0.341813	normal	0.332136	0.709078	normal	0.889302	0.191678	normal	0.910662	0.145197	normal	0.895075	0.199894	normal	0.573895	0.477857	normal	--	--	Biological Process: protein complex assembly (GO:0006461);; Biological Process: intracellular protein transport (GO:0006886);; Molecular Function: Rab GTPase binding (GO:0017137);; Biological Process: regulation of membrane potential (GO:0042391);; Molecular Function: ion channel binding (GO:0044325);; Cellular Component: synapse (GO:0045202);; Molecular Function: metal ion binding (GO:0046872);;…	K15291|0|oas:101107797|K15291 regulating synaptic membrane exocytosis protein 1 | (RefSeq) RIMS1; regulating synaptic membrane exocytosis 1	Synaptic vesicle cycle (ko04721);; Retrograde endocannabinoid signaling (ko04723)	[U]
gene10648	GABRA4	0.008839	2	0.01373	3	0.107716	20	0.064575	10	0.090709	11	0.163094	28	0	0	0.17581	16	0.047696	5	0.045608	8	0.083796	13	0.112368	16	0.765495	0.266446	normal	0.860293	0.15227	normal	0.895199	0.129652	normal	0.874635	-0.197245	normal	0.922782	0.148813	normal	0.991631	-0.0101134	normal	--	--	--	K05175|0|oas:101121776|K05175 gamma-aminobutyric acid receptor subunit alpha | (RefSeq) GABRA4; gamma-aminobutyric acid type A receptor alpha4 subunit	Neuroactive ligand-receptor interaction (ko04080);; Retrograde endocannabinoid signaling (ko04723);; GABAergic synapse (ko04727);; Taste transduction (ko04742);; Morphine addiction (ko05032);; Nicotine addiction (ko05033)	[T]
gene24241	TUT1	2.99112	408	2.59819	451	1.77789	373	1.95207	323	3.67043	503	1.90291	374	3.9066	382	3.77892	382	3.59183	359	2.2375	457	1.02589	175	3.46744	573	0.972362	0.0370452	normal	0.0968293	0.554027	normal	0.964407	-0.0763069	normal	0.211058	0.513786	normal	0.956497	0.104396	normal	0.308339	0.576331	normal	--	--	Molecular Function: mRNA 3'-UTR binding (GO:0003730);; Molecular Function: polynucleotide adenylyltransferase activity (GO:0004652);; Molecular Function: ATP binding (GO:0005524);; Cellular Component: nucleolus (GO:0005730);; Cellular Component: mRNA cleavage and polyadenylation specificity factor complex (GO:0005847);; Biological Process: mRNA polyadenylation (GO:0006378);; Biological Process: m…	K18709|0|oas:101111503|K18709 speckle targeted PIP5K1A-regulated poly(A) polymerase [EC:2.7.7.19 2.7.7.52] | (RefSeq) TUT1; terminal uridylyl transferase 1, U6 snRNA-specific	--	[D]
Ovis_aries_newGene_28082	--	0	0	0	0	0	0	0.359552	6	0.070778	1	0	0	0	0	0	0	0	0	0	0	0.229892	4	0	0	0.839625	0.082271	normal	--	--	--	0.889302	0.0479885	normal	0.696	-0.228398	normal	0.967263	0.0321668	normal	0.754006	-0.115588	normal	--	--	--	--	--	--
gene9927	PRELID2	3.6374	569	2.92503	589	2.83243	694	2.89352	562	4.41473	704	3.52428	653	2.44649	275	3.35649	395	3.03463	397	2.3391	556	2.5551	469	2.36877	452	0.845984	0.127972	normal	0.951876	-0.0347683	normal	0.200845	-0.367499	normal	0.705251	-0.178884	normal	0.164442	0.478658	normal	0.303644	0.342364	normal	--	--	--	--	--	--
gene24225	FADS1	11.3684	2099	9.66466	2263	12.3219	3360	14.0077	3132	15.7156	2907	13.4161	3556	6.29044	835	7.99601	1092	5.28056	692	14.1954	3936	9.4193	2080	8.93332	1926	0.0414134	0.396209	normal	0.00384942	-0.727614	normal	0.978024	-0.0389145	normal	1.08481e-07	-1.15715	down	0.32976	0.400266	normal	0.047704	-0.663566	normal	[I]	Lipid transport and metabolism	Molecular Function: iron ion binding (GO:0005506);; Biological Process: fatty acid biosynthetic process (GO:0006633);; Biological Process: cellular response to starvation (GO:0009267);; Molecular Function: oxidoreductase activity, acting on paired donors, with oxidation of a pair of donors resulting in the reduction of molecular oxygen to two molecules of water (GO:0016717);; Molecular Function: …	K10224|0|oas:101109049|K10224 acyl-CoA (8-3)-desaturase (Delta-5 desaturase) [EC:1.14.19.44] | (RefSeq) FADS1; fatty acid desaturase 1	Biosynthesis of unsaturated fatty acids (ko01040);; Fatty acid metabolism (ko01212)	[I]
gene24357	POLA2	3.92262	566	4.65931	820	3.77608	869	4.36569	723	4.03105	597	4.35497	884	4.16114	450	3.37405	372	4.01355	397	3.33616	737	3.95955	739	3.81272	687	0.926413	0.0497709	normal	0.780861	-0.0992968	normal	0.889302	-0.0972101	normal	0.645263	-0.156306	normal	0.874172	0.141468	normal	0.99688	-0.00161367	normal	--	--	Biological Process: protein import into nucleus, translocation (GO:0000060);; Molecular Function: DNA binding (GO:0003677);; Molecular Function: DNA-directed DNA polymerase activity (GO:0003887);; Cellular Component: alpha DNA polymerase:primase complex (GO:0005658);; Cellular Component: cytoplasm (GO:0005737);; Biological Process: DNA replication (GO:0006260);; Molecular Function: protein hetero…	K02321|0|oas:101107399|K02321 DNA polymerase alpha subunit B | (RefSeq) POLA2; DNA polymerase alpha 2, accessory subunit	Purine metabolism (ko00230);; Pyrimidine metabolism (ko00240);; DNA replication (ko03030)	[L]
gene11590	EMC4	32.2234	1841	33.974	2471	33.4854	2947	35.7511	2482	33.9721	1952	36.9212	3040	37.4769	1537	37.7259	1597	42.7857	1792	33.9429	2908	36.4174	2604	36.5617	2536	0.726954	0.123864	normal	0.198664	0.223915	normal	0.864522	0.0987349	normal	0.716728	0.0934503	normal	0.983574	0.0182189	normal	0.662293	0.118656	normal	--	--	Biological Process: apoptotic process (GO:0006915);; Cellular Component: ER membrane protein complex (GO:0072546);;	--	--	[S]
gene12966	OGFRL1	10.3565	4272	4.3753	2245	10.3651	6541	7.36919	3579	1.06197	419	8.52951	4867	8.66921	2529	10.7619	3142	4.61417	1350	1.03977	603	8.66725	4269	7.67926	3787	0.853785	-0.170187	normal	0.914282	-0.0912337	normal	0.901729	-0.140624	normal	0.804776	0.276946	normal	0.999368	-0.00177839	normal	0.825712	0.2126	normal	[O]	Posttranslational modification, protein turnover, chaperones	Molecular Function: receptor activity (GO:0004872);; Cellular Component: membrane (GO:0016020);;	--	--	--
gene857	PRPF38B	20.5714	4096	21.8283	5287	20.312	6227	14.8102	4041	18.8722	3891	20.733	5876	31.7062	4379	30.2151	4326	27.4647	3926	24.2494	6995	25.2195	6134	22.1577	5148	0.838629	-0.0940111	normal	9.86607e-05	0.470932	normal	0.545139	0.162936	normal	0.000195383	0.562818	normal	0.290028	-0.260308	normal	0.0563805	0.299927	normal	--	--	--	K12850|2.4787e-131|oas:101121896|K12850 pre-mRNA-splicing factor 38B | (RefSeq) PRPF38B; pre-mRNA processing factor 38B	Spliceosome (ko03040)	[R]
Ovis_aries_newGene_100	--	1.79397	98	1.30184	140	1.72856	251	1.55123	192	0.666743	45	1.53624	166	1.30224	62	2.40705	149	1.14742	69	1.39943	175	1.49256	149	2.30296	221	0.932615	-0.101044	normal	0.981924	0.0230156	normal	0.928534	0.119084	normal	0.884601	0.153889	normal	0.895075	-0.202823	normal	0.897198	-0.116338	normal	--	--	--	--	--	--
gene23257	LOC101114653	0	0	0	0	0	0	0	0	0	0	0	0	0	0	0	0	0	0	0	0	0	0	0	0	--	--	--	--	--	--	--	--	--	--	--	--	--	--	--	--	--	--	--	--	--	K04257|0|oas:101114653|K04257 olfactory receptor | (RefSeq) olfactory receptor 12D3-like	Olfactory transduction (ko04740)	--
Ovis_aries_newGene_68004	--	0	0	0	0	0	0	0	0	0	0	0	0	0	0	0.323424	23	0	0	0	0	0	0	0.015268	2	--	--	--	0.663016	0.210062	normal	0.889302	0.042617	normal	0.587144	0.374137	normal	0.895549	-0.0505706	normal	0.691316	0.202478	normal	--	--	--	--	--	--
Ovis_aries_newGene_66251	--	0.203354	13	0.13617	11	0.138779	14	0.219169	17	0.051276	4	0.111669	10	0.309413	14	0.054297	3	0.282148	13	0.285792	27	0.442603	34	0.192325	15	0.947677	-0.0755233	normal	0.849474	0.193482	normal	0.733173	0.345014	normal	0.756687	0.341471	normal	0.688377	-0.385443	normal	0.790432	-0.245784	normal	--	--	--	--	--	--
gene1838	LOC101105121	0	0	0	0	0	0	0	0	0	0	0	0	0	0	0	0	0	0	0	0	0	0	0	0	--	--	--	--	--	--	--	--	--	--	--	--	--	--	--	--	--	--	--	--	Molecular Function: G-protein coupled receptor activity (GO:0004930);; Molecular Function: olfactory receptor activity (GO:0004984);; Cellular Component: plasma membrane (GO:0005886);; Biological Process: G-protein coupled receptor signaling pathway (GO:0007186);; Cellular Component: integral component of membrane (GO:0016021);; Biological Process: detection of chemical stimulus involved in senso…	K04257|0|oas:101105121|K04257 olfactory receptor | (RefSeq) olfactory receptor 5AC1-like	Olfactory transduction (ko04740)	--
gene21819	FBLN5	20.6453	7286	17.2437	7651	28.0221	15208	13.6293	5839	18.1291	6426	16.984	8628	17.2727	4369	18.8946	4908	21.902	5662	16.2055	8487	16.9297	7467	19.1513	8202	0.341352	-0.360692	normal	0.688425	-0.184447	normal	0.586398	-0.288649	normal	0.457117	0.20137	normal	0.923069	-0.0758954	normal	0.724599	0.126512	normal	--	--	Molecular Function: transmembrane signaling receptor activity (GO:0004888);; Molecular Function: calcium ion binding (GO:0005509);; Cellular Component: extracellular region (GO:0005576);; Cellular Component: cytoplasm (GO:0005737);; Biological Process: cell adhesion (GO:0007155);; Biological Process: blood coagulation (GO:0007596);; Molecular Function: protein C-terminus binding (GO:0008022);; Ce…	K17340|0|phd:102328868|K17340 fibulin 5 | (RefSeq) FBLN5; fibulin 5	--	[T]
gene28112	LOC101122335	0	0	0.047389	9	0.031309	7	0.024861	5	0.030089	5	0.010501	3	0.033277	4	0	0	0.020509	2	0.01009	3	0.012091	3	0	0	0.994583	-0.00708889	normal	0.925454	-0.0737392	normal	0.889302	-0.0854716	normal	0.910304	-0.138874	normal	0.895075	0.148011	normal	0.877955	0.103665	normal	--	--	--	--	--	--
gene5211	LHX2	20.9684	3705	14.7093	5069	14.3884	5600	13.2209	4178	23.3909	4466	23.7429	5943	6.16832	1671	8.59814	1890	9.86884	1918	24.0483	6684	20.2014	4796	16.9176	5266	0.834894	0.105298	normal	3.15813e-06	-0.599694	normal	0.681412	0.151861	normal	3.20095e-06	-0.713759	normal	0.952666	-0.0523406	normal	9.63361e-08	-0.755783	normal	--	--	Molecular Function: transcription factor activity, RNA polymerase II transcription factor binding (GO:0001076);; Biological Process: neural tube closure (GO:0001843);; Molecular Function: transcription factor activity, sequence-specific DNA binding (GO:0003700);; Cellular Component: nucleus (GO:0005634);; Biological Process: axon guidance (GO:0007411);; Biological Process: mesoderm development (G…	K09373|0|oas:101108898|K09373 LIM homeobox protein 2/9 | (RefSeq) LHX2; LIM homeobox 2	--	[R]
gene12210	VASH1	3.16702	1249	2.04535	1045	3.14129	1899	1.73633	793	2.27856	866	2.17388	1160	2.58892	694	2.42091	658	2.79373	750	2.04691	1125	2.11456	1015	2.42244	1149	0.216818	-0.427988	normal	0.645854	-0.201766	normal	0.484848	-0.338306	normal	0.301557	0.261114	normal	0.921689	-0.0882553	normal	0.631932	0.169659	normal	--	--	Biological Process: negative regulation of endothelial cell proliferation (GO:0001937);; Cellular Component: extracellular space (GO:0005615);; Cellular Component: endoplasmic reticulum (GO:0005783);; Biological Process: response to wounding (GO:0009611);; Biological Process: negative regulation of angiogenesis (GO:0016525);; Biological Process: negative regulation of blood vessel endothelial cel…	--	--	--
Ovis_aries_newGene_6742	--	0.016923	3	0	0	0.035456	8	0.019005	4	0	0	0.294463	56	0.011919	2	0	0	0	0	0	0	0	0	0.120909	20	0.756706	0.183311	normal	0.830631	-0.116909	normal	0.952149	0.0388179	normal	0.446086	-0.597377	normal	0.9231	0.0723144	normal	0.776462	-0.121493	normal	[R]	General function prediction only	Molecular Function: binding (GO:0005488);;	--	--	[R]
gene18997	GUCY1A2	0.237822	69	0.225403	83	0.356097	158	0.048368	17	0.140445	41	0.053417	23	0.04875	11	0.080023	18	0.270943	58	0.046596	21	0.061568	23	0.079373	28	0.0294126	-0.939933	normal	0.407478	-0.621115	normal	0.000144719	-1.23268	down	0.684379	0.459287	normal	0.931131	0.145851	normal	0.476713	0.569239	normal	[T]	Signal transduction mechanisms	Molecular Function: nucleotide binding (GO:0000166);; Molecular Function: guanylate cyclase activity (GO:0004383);; Molecular Function: heme binding (GO:0020037);; Biological Process: positive regulation of cGMP biosynthetic process (GO:0030828);; Biological Process: intracellular signal transduction (GO:0035556);;	K12318|0|oas:101104339|K12318 guanylate cyclase soluble subunit alpha [EC:4.6.1.2] | (RefSeq) GUCY1A2; guanylate cyclase 1 soluble subunit alpha 2	Purine metabolism (ko00230);; cGMP-PKG signaling pathway (ko04022);; Vascular smooth muscle contraction (ko04270);; Gap junction (ko04540);; Platelet activation (ko04611);; Circadian entrainment (ko04713);; Long-term depression (ko04730);; Oxytocin signaling pathway (ko04921);; Renin secretion (ko04924);; Salivary secretion (ko04970)	[F]
Ovis_aries_newGene_42063	--	11.6007	375	15.7241	647	10.3522	517	17.5401	685	15.8348	500	12.3653	579	7.84125	185	6.05847	144	7.24757	176	14.7187	708	11.8971	480	15.9348	624	0.711797	0.251281	normal	0.0131534	-0.764387	normal	0.889302	0.142257	normal	9.04484e-05	-1.07911	down	0.926232	0.102339	normal	0.000320441	-0.937799	normal	--	--	Molecular Function: structural constituent of ribosome (GO:0003735);; Biological Process: translation (GO:0006412);; Molecular Function: transcription factor binding (GO:0008134);; Molecular Function: zinc ion binding (GO:0008270);; Cellular Component: large ribosomal subunit (GO:0015934);; Cellular Component: integral component of membrane (GO:0016021);; Biological Process: protein ubiquitinatio…	--	--	--
gene8016	LOC105611834	5.4e-05	1	0.009826	2	0.020301	5	0	0	0.015546	3	0	0	0.021782	3	0	0	0	0	0	0	0	0	0	0	0.916723	-0.0559423	normal	0.938273	-0.0562826	normal	0.820127	-0.120702	normal	0.96004	0.0381985	normal	0.895075	0.057028	normal	0.740546	0.129641	normal	--	--	--	--	--	--
Ovis_aries_newGene_62116	--	0.561322	37	0.818385	73	1.56525	105	0.746137	48	0.500918	24	2.30477	142	0.174158	12	1.88138	61	1.3169	43	1.50789	95	1.18188	70	1.30824	85	0.992843	0.0147963	normal	0.975408	-0.0344744	normal	0.914783	0.139773	normal	0.962601	-0.0632368	normal	0.96298	-0.0951521	normal	0.849904	-0.180925	normal	--	--	Cellular Component: cytoplasm (GO:0005737);; Biological Process: polyamine biosynthetic process (GO:0006596);; Biological Process: polyamine catabolic process (GO:0006598);; Biological Process: spermine metabolic process (GO:0008215);; Biological Process: spermidine metabolic process (GO:0008216);; Biological Process: putrescine metabolic process (GO:0009445);; Molecular Function: oxidoreductase …	--	--	--
gene24860	MXI1	9.36448	2092	9.8536	2803	10.2921	3542	7.42489	2016	7.49531	1685	7.50767	2418	11.7566	1886	11.0066	1823	11.969	1960	8.95146	3000	9.48606	2653	11.0533	2999	0.0115716	-0.355114	normal	0.157989	0.216528	normal	0.999546	0.00103477	normal	8.40387e-06	0.575037	normal	0.12056	-0.353796	normal	0.408526	0.20752	normal	--	--	Biological Process: negative regulation of transcription from RNA polymerase II promoter (GO:0000122);; Cellular Component: nucleus (GO:0005634);; Molecular Function: protein dimerization activity (GO:0046983);;	K09114|4.42208e-126|oas:101118067|K09114 MAX dimerization protein | (RefSeq) MXI1; MAX interactor 1, dimerization protein	--	[K]
gene4737	PPP1R8	13.9484	1565	12.739	1819	12.4913	2159	13.0727	1782	17.1576	1856	11.8621	1918	14.1346	1138	15.5949	1296	16.5574	1361	12.979	2183	15.2559	2142	13.2215	1801	0.842559	0.0977135	normal	0.300928	0.220434	normal	0.891706	0.0785012	normal	0.722645	0.113906	normal	0.990718	0.0138206	normal	0.66272	0.135088	normal	--	--	Molecular Function: DNA binding (GO:0003677);; Molecular Function: RNA binding (GO:0003723);; Molecular Function: protein phosphatase inhibitor activity (GO:0004864);; Cellular Component: spliceosomal complex (GO:0005681);; Biological Process: regulation of transcription, DNA-templated (GO:0006355);; Biological Process: mRNA processing (GO:0006397);; Biological Process: cell proliferation (GO:000…	K13216|0|bta:282319|K13216 nuclear inhibitor of protein phosphatase 1 [EC:3.1.4.-] | (RefSeq) PPP1R8; protein phosphatase 1 regulatory subunit 8	--	[R]
gene22241	BRPF1	7.02191	1804	6.99659	2269	6.7383	2738	6.88058	2192	7.5992	1965	6.83732	2487	7.78206	1454	6.79778	1294	8.41144	1527	7.59231	2966	6.97814	2245	8.80892	2538	0.873053	0.0583322	normal	0.684048	0.108475	normal	0.816501	0.124175	normal	0.882137	0.0454593	normal	0.904979	-0.0730771	normal	0.948973	-0.0231852	normal	--	--	Cellular Component: cytoplasm (GO:0005737);; Cellular Component: plasma membrane (GO:0005886);; Molecular Function: zinc ion binding (GO:0008270);; Biological Process: histone H3 acetylation (GO:0043966);; Biological Process: positive regulation of transcription, DNA-templated (GO:0045893);; Cellular Component: MOZ/MORF histone acetyltransferase complex (GO:0070776);;	K11348|0|phd:102325942|K11348 bromodomain and PHD finger-containing protein 1 | (RefSeq) BRPF1; bromodomain and PHD finger containing 1	--	[R]
gene24824	NT5C2	19.7373	2415	22.3313	3540	22.5632	4307	17.8956	2715	19.1411	2312	20.835	3723	34.8526	3133	35.6971	3279	33.4666	3077	25.5918	4772	29.5651	4576	25.9211	3922	0.758618	-0.131816	normal	1.26033e-07	0.673631	normal	0.119659	0.316974	normal	1.54726e-09	0.808652	normal	0.0078389	-0.456499	normal	0.0204198	0.341183	normal	[D]	Cell cycle control, cell division, chromosome partitioning	Molecular Function: nucleotide binding (GO:0000166);; Cellular Component: cytoplasm (GO:0005737);; Molecular Function: 5'-nucleotidase activity (GO:0008253);; Biological Process: nucleotide metabolic process (GO:0009117);; Molecular Function: metal ion binding (GO:0046872);;	K01081|0|chx:102183758|K01081 5'-nucleotidase [EC:3.1.3.5] | (RefSeq) NT5C2; 5'-nucleotidase, cytosolic II	Purine metabolism (ko00230);; Pyrimidine metabolism (ko00240);; Nicotinate and nicotinamide metabolism (ko00760)	[F]
gene19197	BSX	0	0	0	0	0	0	0	0	0	0	0	0	0	0	0	0	0	0	0	0	0	0	0	0	--	--	--	--	--	--	--	--	--	--	--	--	--	--	--	--	--	--	--	--	Molecular Function: transcription factor activity, sequence-specific DNA binding (GO:0003700);; Cellular Component: nucleus (GO:0005634);; Cellular Component: transcription factor complex (GO:0005667);; Cellular Component: cytoplasm (GO:0005737);; Biological Process: locomotory behavior (GO:0007626);; Biological Process: eating behavior (GO:0042755);; Molecular Function: sequence-specific DNA bin…	--	--	[R]
Ovis_aries_newGene_34990	--	0	0	0	0	0	0	0	0	0	0	0	0	0.087029	2	0	0	0	0	0.282991	7	0.348434	8	0	0	--	--	--	0.740203	0.126773	normal	0.841075	0.11033	normal	0.696	0.214363	normal	0.83873	-0.128605	normal	0.767075	-0.15446	normal	--	--	--	K00312|1.20627e-14|mdo:100024702|K00312 wingless-type MMTV integration site family, member 3 | (RefSeq) WNT3; Wnt family member 3	mTOR signaling pathway (ko04150);; Wnt signaling pathway (ko04310);; Hippo signaling pathway (ko04390);; Signaling pathways regulating pluripotency of stem cells (ko04550);; Melanogenesis (ko04916);; HTLV-I infection (ko05166);; Pathways in cancer (ko05200);; Proteoglycans in cancer (ko05205);; MicroRNAs in cancer (ko05206);; Basal cell carcinoma (ko05217)	--
gene4793	STMN1	69.4539	3789	48.8138	4535	56.9687	4826	62.8457	4181	75.0042	4131	58.3291	4613	55.9784	3071	63.4107	2608	43.1591	2314	39.1331	4799	54.6813	5066	77.396	5036	0.912368	0.0593502	normal	0.91242	0.0459428	normal	0.889302	0.112593	normal	0.966167	-0.0185585	normal	0.953344	-0.0617862	normal	0.857292	-0.0758529	normal	--	--	Cellular Component: cytosol (GO:0005829);; Biological Process: microtubule depolymerization (GO:0007019);; Biological Process: mitotic spindle organization (GO:0007052);; Biological Process: axonogenesis (GO:0007409);; Biological Process: response to virus (GO:0009615);; Molecular Function: tubulin binding (GO:0015631);; Cellular Component: membrane (GO:0016020);; Biological Process: negative reg…	K04381|4.38315e-97|umr:103666526|K04381 stathmin | (RefSeq) STMN1; stathmin 1	MAPK signaling pathway (ko04010);; MicroRNAs in cancer (ko05206)	--
gene18725	TMEM238	0.614393	21	0.683169	30	0.688851	36	1.11438	46	0.402438	14	0.631142	31	1.02581	25	1.62363	41	2.88908	71	0.645076	33	1.04279	44	0.742492	31	0.951195	0.0750301	normal	0.0660779	1.01466	normal	0.911044	0.151029	normal	0.194411	0.946713	normal	0.97689	-0.0628254	normal	0.192473	0.794806	normal	--	--	--	--	--	--
gene18026	GRAMD1A	7.42015	1423	6.52845	1660	7.23111	2183	5.23597	1251	6.37478	1174	6.46638	1667	6.88853	944	6.64424	995	6.23689	915	7.44228	2012	7.34826	1911	7.18917	1786	0.167589	-0.267138	normal	0.716314	-0.0981954	normal	0.911044	0.0646584	normal	0.432538	0.170332	normal	0.0933171	-0.336264	normal	0.478944	-0.168377	normal	--	--	--	--	--	[S]
gene7887	TMEM243	8.02275	349	8.49609	471	10.2543	688	6.55891	347	9.10695	399	8.35092	524	8.0255	251	7.5978	245	7.73947	247	8.16514	533	8.68571	473	7.35159	389	0.842559	-0.119399	normal	0.581671	-0.203633	normal	0.889302	-0.131305	normal	0.851899	-0.0812515	normal	0.998181	0.00559293	normal	0.863718	-0.0679336	normal	--	--	Cellular Component: integral component of membrane (GO:0016021);;	--	--	--
gene15652	TMCC2	1.36599	272	1.12411	281	1.60261	496	0.866472	209	1.33812	271	2.20675	619	1.49021	222	1.17141	175	1.80749	260	1.59537	478	1.61514	405	0.95895	225	0.935329	0.0886198	normal	0.839317	0.115614	normal	0.992532	0.0168339	normal	0.999281	0.00117875	normal	0.974486	0.0650309	normal	0.895711	0.0907368	normal	--	--	Cellular Component: integral component of membrane (GO:0016021);;	--	--	[S]
gene10658	CORIN	0.381784	210	0.275672	196	0.37223	321	0.136333	92	0.261802	141	0.283386	229	0.19244	77	0.712905	289	1.22049	404	0.283872	238	0.320808	225	0.187576	128	0.447636	-0.439762	normal	0.350318	0.620093	normal	0.789771	-0.277526	normal	0.0542209	1.15471	normal	0.909404	-0.159541	normal	0.138254	0.858405	normal	[O]	Posttranslational modification, protein turnover, chaperones	--	K09614|0|bta:527107|K09614 corin [EC:3.4.21.-] | (RefSeq) CORIN; corin, serine peptidase	--	[T]
gene21361	NR2F2	7.55643	936	8.07133	1240	9.38945	1848	5.5084	819	6.61211	883	6.46829	1231	9.98658	885	8.46597	742	10.1761	322	13.3623	858	14.3554	769	8.20061	1247	0.317023	-0.317729	normal	0.768365	-0.197561	normal	0.483305	-0.388094	normal	0.897148	0.0976101	normal	0.932286	0.110914	normal	0.780683	0.200026	normal	--	--	Biological Process: negative regulation of transcription from RNA polymerase II promoter (GO:0000122);; Biological Process: neuron migration (GO:0001764);; Biological Process: maternal placenta development (GO:0001893);; Biological Process: negative regulation of endothelial cell proliferation (GO:0001937);; Molecular Function: retinoic acid binding (GO:0001972);; Molecular Function: steroid horm…	K08548|0|phd:102329239|K08548 COUP transcription factor 2 | (RefSeq) COUP transcription factor 2-like	--	[T]
gene3310	TRMT10B	5.02562	686	5.68976	897	3.76258	965	3.16347	635	3.14844	643	2.89997	816	6.36557	711	3.70503	476	4.78714	558	2.48597	698	3.3904	634	2.55723	619	0.624133	-0.185511	normal	0.590868	0.217934	normal	0.0325919	-0.415475	normal	0.181533	0.408361	normal	0.574051	0.22526	normal	0.0166688	0.62993	normal	--	--	Molecular Function: methyltransferase activity (GO:0008168);; Biological Process: methylation (GO:0032259);;	--	--	[S]
gene17895	CDH3	40.413	5878	40.9377	7592	35.4615	8003	42.4322	7539	43.959	6338	44.8846	9336	26.8976	2824	21.4095	2418	23.5394	2593	41.3845	8955	33.2676	6096	36.7967	6469	0.453626	0.179711	normal	5.02345e-06	-0.667519	normal	0.905575	-0.0705398	normal	1.63511e-10	-0.861845	normal	0.316918	0.243256	normal	0.00026459	-0.595986	normal	[U]	Intracellular trafficking, secretion, and vesicular transport	Molecular Function: calcium ion binding (GO:0005509);; Cellular Component: plasma membrane (GO:0005886);; Cellular Component: cell-cell adherens junction (GO:0005913);; Biological Process: homophilic cell adhesion via plasma membrane adhesion molecules (GO:0007156);; Cellular Component: integral component of membrane (GO:0016021);;	K06796|0|oas:101111652|K06796 cadherin 3, type 1, P-cadherin | (RefSeq) CDH3; cadherin 3	Cell adhesion molecules (CAMs) (ko04514)	[S]
gene1601	RGS4	1.21286	176	1.24197	240	2.61616	625	0.885349	142	0.765896	95	0.788529	168	2.79412	317	3.52684	415	5.09682	581	1.56981	359	1.39339	260	1.41584	258	0.0411307	-0.832607	normal	0.0225962	0.992828	normal	0.901729	-0.15192	normal	9.53118e-14	2.2383	up	0.0015881	-0.843339	normal	6.79682e-06	1.2904	up	--	--	Biological Process: termination of G-protein coupled receptor signaling pathway (GO:0038032);;	K16449|1.0403e-134|phd:102316863|K16449 regulator of G-protein signaling | (RefSeq) RGS4; regulator of G-protein signaling 4	--	[T]
Ovis_aries_newGene_14517	--	0.172958	7	0	0	0.005761	1	0.145386	7	0	0	0	0	0	0	0	0	0	0	0	0	0.362589	18	0	0	0.980709	-0.0127894	normal	0.738244	-0.15433	normal	0.960278	0.031735	normal	0.696	-0.227955	normal	0.958193	-0.0361524	normal	0.740546	-0.137615	normal	--	--	--	--	--	--
gene24630	LIPM	31.9743	3076	34.0782	4210	35.3596	5258	36.6232	4158	29.3134	2827	28.0073	3833	49.0764	3479	52.7555	3834	50.4196	3633	34.0408	4874	47.7633	5893	37.4078	4357	0.840366	-0.0993605	normal	3.07828e-07	0.589254	normal	0.707942	0.216052	normal	0.000261068	0.684602	normal	0.507558	-0.314246	normal	0.189711	0.340899	normal	[I]	Lipid transport and metabolism	Biological Process: lipid catabolic process (GO:0016042);; Molecular Function: hydrolase activity, acting on ester bonds (GO:0016788);;	K19406|0|oas:101120285|K19406 lipase-like abhydrolase domain-containing protein 3 [EC:3.1.1.-] | (RefSeq) LIPM; lipase family member M	--	[I]
Ovis_aries_newGene_41056	--	0.183794	7	0.088802	5	0.322779	18	0.048352	3	0.204366	8	0	0	0.146982	4	0	0	0.16022	5	0.074626	4	0.135494	7	0.084322	4	0.839625	-0.156046	normal	0.776167	-0.241396	normal	0.889302	-0.20126	normal	0.96711	0.0495621	normal	0.988898	-0.0195552	normal	0.985371	0.0173833	normal	--	--	--	--	--	--
gene15706	LOC101116246	36.667	4403	42.8602	6493	35.0849	6453	34.5132	5096	34.1315	4210	33.0616	5799	39.0196	3363	35.3607	3166	33.9379	2937	31.0236	5522	31.5659	4697	33.7945	4945	0.829545	-0.107819	normal	0.752469	-0.0918678	normal	0.405812	-0.235665	normal	0.965076	0.0138268	normal	0.800051	0.124986	normal	0.548505	0.147147	normal	[P]	Inorganic ion transport and metabolism	Molecular Function: calcium-transporting ATPase activity (GO:0005388);; Molecular Function: ATP binding (GO:0005524);; Cellular Component: integral component of membrane (GO:0016021);; Molecular Function: metal ion binding (GO:0046872);;	K05850|0|oas:101116246|K05850 Ca2+ transporting ATPase, plasma membrane [EC:3.6.3.8] | (RefSeq) plasma membrane calcium-transporting ATPase 4-like	Calcium signaling pathway (ko04020);; cGMP-PKG signaling pathway (ko04022);; cAMP signaling pathway (ko04024);; Adrenergic signaling in cardiomyocytes (ko04261);; Salivary secretion (ko04970);; Pancreatic secretion (ko04972)	[P]
gene17620	TRAPPC2L	20.7553	2206	20.7309	2805	20.5372	3362	18.9631	2449	17.6241	1884	22.3387	3421	25.6852	1960	22.4099	1765	26.6671	2077	21.3883	3409	22.2077	2954	22.0103	2840	0.942731	-0.0404221	normal	0.138652	0.249242	normal	0.886935	0.0801776	normal	0.239745	0.285541	normal	0.895075	-0.124032	normal	0.451884	0.1639	normal	--	--	Cellular Component: endoplasmic reticulum (GO:0005783);; Cellular Component: Golgi apparatus (GO:0005794);; Biological Process: ER to Golgi vesicle-mediated transport (GO:0006888);; Cellular Component: perinuclear region of cytoplasm (GO:0048471);;	K20301|2.23078e-99|oas:101108596|K20301 trafficking protein particle complex subunit 2 | (RefSeq) TRAPPC2L; trafficking protein particle complex 2 like	--	[S]
Ovis_aries_newGene_41576	--	0	0	0	0	0.048338	3	0.635161	21	0.259102	8	0.103342	5	1.03486	21	3.69296	74	0.152395	4	0.194796	8	0.767715	26	0.864954	29	0.389778	0.370804	normal	0.0288307	1.1606	up	0.201419	0.463566	normal	0.192979	1.08058	normal	0.895075	-0.197771	normal	0.501706	0.534032	normal	--	--	Cellular Component: extracellular region (GO:0005576);; Biological Process: negative regulation of peptidase activity (GO:0010466);; Molecular Function: peptidase inhibitor activity (GO:0030414);;	--	--	[W]
gene23358	ZSCAN23	0.531168	139	0.583542	152	1.05087	227	0.814941	257	0.795029	131	0.867041	213	0.625442	84	1.05884	138	0.998809	206	0.541214	192	0.687391	255	0.531417	183	0.786263	0.244004	normal	0.482728	0.426651	normal	0.889302	0.194705	normal	0.823858	0.172349	normal	0.983574	0.038341	normal	0.771703	0.209091	normal	[R]	General function prediction only	Molecular Function: nucleic acid binding (GO:0003676);; Molecular Function: transcription factor activity, sequence-specific DNA binding (GO:0003700);; Cellular Component: nucleus (GO:0005634);; Biological Process: transcription, DNA-templated (GO:0006351);; Molecular Function: metal ion binding (GO:0046872);;	--	--	[R]
gene5952	ANKRD53	0.094213	16	0.231017	33	0.194417	28	0.631958	38	0.155851	20	0.263618	42	0.721179	48	0.149578	27	0.269662	22	0.275086	38	0.299974	39	0.279939	29	0.839625	0.243785	normal	0.225562	0.769437	normal	0.889302	0.215535	normal	0.550113	0.521861	normal	0.994414	0.0185024	normal	0.505208	0.498458	normal	[T]	Signal transduction mechanisms	--	--	--	[R]
Ovis_aries_newGene_41521	--	0.377414	30	0	0	0.520152	64	0	0	0	0	1.29632	148	0.922033	53	0.354055	21	0.540473	32	0.602577	105	0.269249	53	0	0	0.973456	0.0128439	normal	0.737703	0.328058	normal	0.972976	0.0253328	normal	0.947872	0.0693706	normal	0.998181	-0.00217578	normal	0.911605	0.113702	normal	--	--	Biological Process: negative regulation of transcription from RNA polymerase II promoter (GO:0000122);; Molecular Function: RNA polymerase II core promoter proximal region sequence-specific DNA binding (GO:0000978);; Molecular Function: transcriptional repressor activity, RNA polymerase II core promoter proximal region sequence-specific binding (GO:0001078);; Biological Process: outflow tract sep…	K10176|1.07607e-41|chx:102190545|K10176 T-box protein 2 | (RefSeq) TBX2; T-box 2	--	[K]
gene629	SLC44A5	0.050898	11	0.051971	14	0.108016	35	0.07448	20	0.013664	3	0.04498	14	0.040072	7	0.118272	19	0.012238	2	0.069562	22	0.137202	37	0.034302	9	0.853785	-0.169615	normal	0.928212	-0.100797	normal	0.97184	0.0608191	normal	0.913211	0.147563	normal	0.895075	-0.208203	normal	0.861437	-0.172688	normal	--	--	Cellular Component: integral component of membrane (GO:0016021);;	K15377|0|oas:101107837|K15377 solute carrier family 44 (choline transporter-like protein), member 2/4/5 | (RefSeq) SLC44A5; solute carrier family 44 member 5	Choline metabolism in cancer (ko05231)	[I]
Ovis_aries_newGene_52141	--	0.558973	49	0.22768	25	0.38632	52	0.341788	36	0.629396	55	0.226695	29	0.448491	28	0.445474	29	0.232197	15	0.563268	73	0.259198	28	0.385868	41	0.987608	0.0218842	normal	0.96929	-0.0423628	normal	0.992769	0.0190393	normal	0.946916	-0.0846123	normal	0.999368	-0.00127385	normal	0.945158	-0.0734616	normal	--	--	--	--	--	--
gene15843	LOC101115386	0.029079	1	0.128409	6	0.02692	2	0.065674	3	0.050486	2	0.161827	8	0	0	0.026804	1	0	0	0.11401	6	0.08415	4	0.143044	6	0.925357	0.0778973	normal	0.73401	-0.223398	normal	0.906598	0.107554	normal	0.574545	-0.483007	normal	0.979868	-0.0437267	normal	0.511154	-0.401075	normal	--	--	Cellular Component: nucleosome (GO:0000786);; Molecular Function: DNA binding (GO:0003677);; Cellular Component: nucleus (GO:0005634);; Biological Process: nucleosome assembly (GO:0006334);; Molecular Function: protein heterodimerization activity (GO:0046982);;	K11253|1.55068e-95|oas:101115386|K11253 histone H3 | (RefSeq) histone H3.3C-like	Alcoholism (ko05034);; Transcriptional misregulation in cancer (ko05202);; Systemic lupus erythematosus (ko05322)	[B]
Ovis_aries_newGene_12690	--	0.448519	25	0.212301	24	0.425866	41	0.458401	39	0.179912	17	0.045439	6	0.454015	29	1.36752	43	0.170093	12	0.209355	28	0.097538	11	0.257928	28	0.909719	-0.124179	normal	0.620137	0.438748	normal	0.889302	-0.201804	normal	0.534984	0.631588	normal	0.988638	0.0292596	normal	0.376676	0.651158	normal	--	--	--	--	--	--
gene2417	MME	3.03471	524	2.69242	594	2.30312	653	3.07978	620	2.24039	392	3.02923	747	1.33017	182	3.67497	461	6.43362	829	1.70264	446	2.53204	550	1.45373	336	0.965296	0.0355197	normal	0.625765	0.377506	normal	0.397196	-0.396973	normal	0.631212	0.380417	normal	0.406785	0.424618	normal	0.208752	0.724265	normal	[O]	Posttranslational modification, protein turnover, chaperones	Biological Process: kidney development (GO:0001822);; Molecular Function: metalloendopeptidase activity (GO:0004222);; Cellular Component: plasma membrane (GO:0005886);; Cellular Component: brush border (GO:0005903);; Biological Process: proteolysis (GO:0006508);; Cellular Component: synaptic vesicle (GO:0008021);; Molecular Function: zinc ion binding (GO:0008270);; Cellular Component: integral c…	K01389|0|oas:101112618|K01389 neprilysin [EC:3.4.24.11] | (RefSeq) MME; membrane metalloendopeptidase	Renin-angiotensin system (ko04614);; Hematopoietic cell lineage (ko04640);; Protein digestion and absorption (ko04974);; Alzheimer's disease (ko05010)	[E]
Ovis_aries_newGene_37121	--	0.15805	8	0.135335	9	0.224896	17	0.221946	13	0.293756	14	0.149245	11	0.420004	15	0.220023	8	0.199364	7	0.099769	7	0.291043	18	0.085396	5	0.917159	0.115545	normal	0.739708	0.329894	normal	0.979575	-0.0437481	normal	0.871425	0.197969	normal	0.925003	0.139327	normal	0.72883	0.350148	normal	--	--	--	--	--	--
gene28395	LOC101121920	0.044748	3	0	0	0	0	0	0	0	0	0	0	0.123826	5	0	0	0.045786	2	0.059669	5	0.043973	3	0	0	0.839625	-0.0595546	normal	0.814157	0.124775	normal	0.961813	0.0292039	normal	0.623648	0.329851	normal	0.895075	-0.0797036	normal	0.899066	0.0905778	normal	--	--	--	K06512|2.97797e-169|oas:101121920|K06512 leukocyte immunoglobulin-like receptor | (RefSeq) leukocyte immunoglobulin-like receptor subfamily A member 6	Osteoclast differentiation (ko04380)	--
gene12756	AIG1	14.378	1034	11.2331	1011	12.3941	1391	10.4319	936	10.3778	784	11.2378	1135	10.1173	501	8.65396	442	12.5855	674	9.65456	1003	12.6309	1087	11.5136	1009	0.687248	-0.181512	normal	0.426001	-0.29948	normal	0.83847	-0.181577	normal	0.754174	-0.124425	normal	0.998606	0.00214951	normal	0.816906	-0.111582	normal	--	--	Cellular Component: integral component of membrane (GO:0016021);;	--	--	[W]
gene5186	ZBTB43	5.76451	1686	6.10038	2254	5.26686	2368	5.12005	1817	5.54333	1628	5.07173	2136	7.01046	1471	6.9753	1510	6.18215	1323	5.9588	2602	5.41673	1976	4.64951	1659	0.839625	-0.0875166	normal	0.305553	0.218857	normal	0.889302	-0.0867092	normal	0.0738371	0.306455	normal	0.998181	-0.00467969	normal	0.151728	0.304348	normal	--	--	Molecular Function: nucleic acid binding (GO:0003676);; Cellular Component: nucleus (GO:0005634);; Molecular Function: metal ion binding (GO:0046872);;	K10514|0|oas:101105227|K10514 zinc finger and BTB domain-containing protein 43 | (RefSeq) ZBTB43; zinc finger and BTB domain containing 43	--	[R]
gene7272	LOC101102227	0.001452	1	0	0	0.019848	3	0.01675	2	0	0	0.030693	3	0.054943	3	0	0	0.038379	2	0.291725	15	0.103224	9	0.22111	18	0.971509	0.0199891	normal	0.840966	0.126206	normal	0.257386	0.458365	normal	0.892564	0.132118	normal	0.296649	-0.505123	normal	0.342016	-0.639636	normal	--	--	Molecular Function: carbohydrate binding (GO:0030246);;	K06516|1.7968e-121|oas:101102227|K06516 killer cell lectin-like receptor subfamily D member 1 | (RefSeq) natural killer cells antigen CD94-like	Antigen processing and presentation (ko04612);; Natural killer cell mediated cytotoxicity (ko04650)	[TV]
gene18028	HPN	6.9907	504	4.14993	453	4.74979	581	5.87889	603	4.8699	348	6.72913	793	9.38417	415	5.9518	269	8.58673	376	5.58336	541	6.83473	653	5.6577	575	0.839625	0.173123	normal	0.728692	0.19863	normal	0.911287	0.112943	normal	0.995029	0.00422182	normal	0.974227	0.0540297	normal	0.909824	0.0707619	normal	[O]	Posttranslational modification, protein turnover, chaperones	Molecular Function: serine-type endopeptidase activity (GO:0004252);; Molecular Function: scavenger receptor activity (GO:0005044);; Cellular Component: endoplasmic reticulum membrane (GO:0005789);; Cellular Component: integral component of plasma membrane (GO:0005887);; Cellular Component: cell-cell junction (GO:0005911);; Biological Process: proteolysis (GO:0006508);; Biological Process: regula…	K08665|0|oas:101117692|K08665 hepsin [EC:3.4.21.106] | (RefSeq) HPN; hepsin	Viral carcinogenesis (ko05203)	[E]
gene25163	C23H18orf21	6.76573	1038	6.37085	1203	6.5715	1561	5.58175	1020	8.15044	1216	6.59064	1510	9.8152	1114	8.8442	1053	9.50873	1061	7.35288	1666	8.04344	1692	6.84853	1327	0.911054	0.0662436	normal	9.80081e-05	0.535936	normal	0.537571	0.231212	normal	0.0301102	0.460356	normal	0.863696	-0.167352	normal	0.193059	0.285667	normal	--	--	--	--	--	--
gene14066	DOCK9	16.5621	5056	17.5114	6861	18.8725	8887	15.2054	5913	18.5565	5651	15.2109	6637	17.1947	4361	16.8575	3937	14.9191	3691	19.8331	9048	16.6447	6729	18.8581	7985	0.852913	-0.0731642	normal	0.993743	0.00308215	normal	0.803516	0.143001	normal	0.788487	0.0740779	normal	0.529967	-0.221988	normal	0.632245	-0.148811	normal	--	--	Molecular Function: guanyl-nucleotide exchange factor activity (GO:0005085);; Molecular Function: phospholipid binding (GO:0005543);; Biological Process: small GTPase mediated signal transduction (GO:0007264);;	--	--	[T]
gene4518	DNPEP	6.2607	1458	6.14818	1955	6.28419	2349	5.79259	1738	5.80971	1441	10.2715	2155	8.47668	895	7.32993	810	4.90752	845	6.56499	2344	6.27762	1903	6.74833	1876	0.961519	-0.0214908	normal	0.00925699	-0.380534	normal	0.949709	0.0344945	normal	0.0323584	-0.364675	normal	0.903606	-0.0625647	normal	0.00395224	-0.419329	normal	[E]	Amino acid transport and metabolism	Molecular Function: aminopeptidase activity (GO:0004177);; Cellular Component: cytoplasm (GO:0005737);; Biological Process: proteolysis (GO:0006508);; Molecular Function: metallopeptidase activity (GO:0008237);; Molecular Function: zinc ion binding (GO:0008270);;	K01267|0|oas:101117054|K01267 aspartyl aminopeptidase [EC:3.4.11.21] | (RefSeq) DNPEP; aspartyl aminopeptidase	--	[E]
Ovis_aries_newGene_42122	--	6.72604	445	5.46183	465	4.39756	453	6.96116	547	9.16396	616	5.98056	576	2.99759	144	2.79714	139	4.58083	225	7.96504	784	5.04637	414	6.81976	543	0.442038	0.365514	normal	0.120543	-0.609834	normal	0.889302	0.193057	normal	0.00148736	-1.04588	down	0.895075	0.154888	normal	0.0216512	-0.820499	normal	--	--	Cellular Component: integral component of membrane (GO:0016021);;	--	--	--
gene24831	CALHM2	11.4637	1463	12.8825	2154	10.6666	2251	10.5236	1716	9.93678	1411	11.2402	2255	11.4938	1148	10.3097	1015	11.1961	1122	10.2139	2155	11.2321	1900	12.1047	2018	0.933131	-0.0434001	normal	0.875603	-0.0515467	normal	0.998827	0.00176837	normal	0.974005	-0.0116068	normal	0.952972	-0.0515396	normal	0.859721	-0.0577421	normal	--	--	Biological Process: ion transport (GO:0006811);; Cellular Component: integral component of membrane (GO:0016021);;	K19739|0|oas:101112099|K19739 calcium homeostasis modulator protein 2 | (RefSeq) CALHM2; calcium homeostasis modulator 2	--	--
Ovis_aries_newGene_14466	--	0.200773	21	0.366882	49	0.154686	25	0.173883	22	0.028646	3	0.223714	34	0.467383	35	0	0	0.258504	20	0.16489	26	0.186411	25	0.15848	20	0.839625	-0.22481	normal	0.996352	-0.00597657	normal	0.889302	-0.215732	normal	0.812567	0.269732	normal	0.972242	-0.0690927	normal	0.877541	0.150383	normal	--	--	--	--	--	--
gene20561	NDUFS6	21.4158	902	9.15701	943	13.0589	1210	10.3003	937	18.3018	805	19.637	1205	19.3958	513	15.7863	605	28.8459	643	22.492	1212	10.2215	1004	10.9485	1006	0.976446	0.0172934	normal	0.954945	-0.0250491	normal	0.994125	0.00824323	normal	0.895328	-0.0478632	normal	0.998181	0.0030913	normal	0.923717	-0.0373828	normal	--	--	Cellular Component: mitochondrial inner membrane (GO:0005743);; Biological Process: fatty acid metabolic process (GO:0006631);; Biological Process: muscle contraction (GO:0006936);; Biological Process: multicellular organism aging (GO:0010259);; Biological Process: respiratory electron transport chain (GO:0022904);; Biological Process: multicellular organism growth (GO:0035264);; Biological Proce…	K03939|2.80476e-79|oas:101111395|K03939 NADH dehydrogenase (ubiquinone) Fe-S protein 6 | (RefSeq) NDUFS6; NADH:ubiquinone oxidoreductase subunit S6	Oxidative phosphorylation (ko00190);; Non-alcoholic fatty liver disease (NAFLD) (ko04932);; Alzheimer's disease (ko05010);; Parkinson's disease (ko05012);; Huntington's disease (ko05016)	[C]
gene5601	CTNNA2	0	0	0.013553	4	0.01682	6	0.021804	7	0.008782	3	0.018028	6	0.028096	5	0	0	0.036156	7	0.036988	13	0.014116	5	0	0	0.870093	0.118911	normal	0.79303	0.181103	normal	0.945951	0.0540356	normal	0.943526	0.0973507	normal	0.998051	0.00771024	normal	0.945691	0.0546523	normal	--	--	Molecular Function: structural molecule activity (GO:0005198);; Cellular Component: cytoplasm (GO:0005737);; Cellular Component: cell-cell adherens junction (GO:0005913);; Biological Process: cell adhesion (GO:0007155);; Biological Process: axonogenesis (GO:0007409);; Cellular Component: actin cytoskeleton (GO:0015629);; Cellular Component: basolateral plasma membrane (GO:0016323);; Biological Pr…	K05691|0|cjc:100390556|K05691 catenin alpha | (RefSeq) CTNNA2; catenin alpha 2	Hippo signaling pathway (ko04390);; Adherens junction (ko04520);; Tight junction (ko04530);; Leukocyte transendothelial migration (ko04670);; Bacterial invasion of epithelial cells (ko05100);; Pathways in cancer (ko05200);; Endometrial cancer (ko05213);; Arrhythmogenic right ventricular cardiomyopathy (ARVC) (ko05412)	[W]
gene5494	LBH	81.5333	4210	78.7664	5178	85.971	6839	100.982	6337	100.738	5233	93.3683	6948	152.184	5641	82.44	3155	111.075	4204	92.7423	7182	96.5406	6239	91.7079	5750	0.0806539	0.282006	normal	0.174167	0.441154	normal	0.318527	0.186052	normal	0.696	0.170071	normal	0.892094	0.0898372	normal	0.542391	0.257737	normal	--	--	Cellular Component: nucleolus (GO:0005730);; Cellular Component: cytoplasm (GO:0005737);; Biological Process: multicellular organism development (GO:0007275);; Biological Process: positive regulation of transcription, DNA-templated (GO:0045893);;	--	--	--
gene23056	PAQR8	6.35069	768	5.64252	982	6.4715	1294	8.328	1251	5.58161	577	6.60123	1238	6.48008	604	3.55448	362	3.46421	459	5.92338	1086	5.33256	1010	4.25069	543	0.932068	0.0748067	normal	0.499567	-0.27992	normal	0.838815	-0.220945	normal	0.475147	-0.365361	normal	0.826324	0.270771	normal	0.965381	-0.0310427	normal	--	--	Molecular Function: steroid binding (GO:0005496);; Cellular Component: plasma membrane (GO:0005886);; Biological Process: multicellular organism development (GO:0007275);; Cellular Component: integral component of membrane (GO:0016021);; Biological Process: cell differentiation (GO:0030154);; Biological Process: oogenesis (GO:0048477);;	--	--	[RT]
Ovis_aries_newGene_5822	--	0.554804	22	0.074099	4	0.144791	9	0	0	0.129439	5	0	0	1.19162	33	0	0	0	0	0.804761	47	0.07652	4	0.54484	26	0.677283	-0.228578	normal	0.915604	0.086292	normal	0.889302	0.157824	normal	0.668756	0.334225	normal	0.51963	-0.329794	normal	0.9495	-0.0523203	normal	--	--	Molecular Function: calcium ion binding (GO:0005509);;	K11583|1.80679e-23|chx:102177705|K11583 serine/threonine-protein phosphatase 2A regulatory subunit B'' | (RefSeq) PPP2R3B; protein phosphatase 2 regulatory subunit B''beta	mRNA surveillance pathway (ko03015);; Sphingolipid signaling pathway (ko04071);; PI3K-Akt signaling pathway (ko04151);; AMPK signaling pathway (ko04152);; Adrenergic signaling in cardiomyocytes (ko04261);; Dopaminergic synapse (ko04728)	--
gene28474	LOC101117738	0	0	0	0	0	0	0	0	0	0	0	0	0	0	0	0	0	0	0	0	0	0	0	0	--	--	--	--	--	--	--	--	--	--	--	--	--	--	--	--	--	--	--	--	Molecular Function: aspartic-type endopeptidase activity (GO:0004190);; Biological Process: proteolysis (GO:0006508);;	K06002|1.79575e-157|oas:101117738|K06002 pepsin A [EC:3.4.23.1] | (RefSeq) pregnancy-associated glycoprotein 1-like	Protein digestion and absorption (ko04974)	[O]
gene17332	LOC101112752	0	0	0	0	0	0	0	0	0	0	0	0	0	0	0	0	0	0	0	0	0	0	0	0	--	--	--	--	--	--	--	--	--	--	--	--	--	--	--	--	--	--	--	--	Molecular Function: serine-type endopeptidase inhibitor activity (GO:0004867);;	--	--	[O]
gene2932	SVEP1	7.4745	4534	6.81802	4936	8.81073	7685	5.25349	3582	7.17617	4431	7.19356	5866	9.40955	3473	11.0908	4628	8.70829	3613	7.83379	6712	6.30567	4480	4.07133	2988	0.734074	-0.188906	normal	0.446511	0.234034	normal	0.633208	-0.295592	normal	0.0937816	0.432583	normal	0.917118	0.117667	normal	0.0839775	0.547863	normal	[U]	Intracellular trafficking, secretion, and vesicular transport	Molecular Function: chromatin binding (GO:0003682);; Molecular Function: calcium ion binding (GO:0005509);;	K17495|0|oas:101113459|K17495 CUB and sushi domain-containing protein | (RefSeq) SVEP1; sushi, von Willebrand factor type A, EGF and pentraxin domain containing 1	--	[T]
gene15693	C4BPB	0.153537	4	0	0	0.011022	1	0.017435	1	0	0	0.039921	2	0.132651	3	0.014951	1	0.143962	3	0.08724	4	0	0	0	0	0.930653	-0.044934	normal	0.815668	0.168316	normal	0.973099	-0.0207744	normal	0.645811	0.439634	normal	0.994414	-0.00591518	normal	0.747155	0.197119	normal	--	--	--	K04003|3.34685e-83|oas:101114204|K04003 complement component 4 binding protein, beta | (RefSeq) C4BPB; complement component 4 binding protein beta	Complement and coagulation cascades (ko04610);; Pertussis (ko05133)	[TV]
Ovis_aries_newGene_18918	--	0.071273	2	0.410518	15	0.143494	6	0	0	0.363948	10	0.097321	4	0	0	0	0	0	0	0	0	0.213785	8	0.240759	8	0.940495	-0.0604766	normal	0.325702	-0.529626	normal	0.965836	-0.0465109	normal	0.594888	-0.37222	normal	0.998181	-0.00424282	normal	0.637116	-0.234074	normal	--	--	--	--	--	--
gene23569	TRIM38	2.89603	786	3.95789	1382	2.45426	921	3.3377	1019	3.27572	849	3.02706	1220	5.20983	1017	3.31715	620	3.60108	709	2.83011	951	3.95263	1233	2.68965	860	0.948368	0.0555257	normal	0.534433	0.326817	normal	0.963681	-0.0650791	normal	0.464536	0.285635	normal	0.895296	0.125329	normal	0.340786	0.404483	normal	--	--	Molecular Function: signal transducer activity (GO:0004871);; Cellular Component: intracellular (GO:0005622);; Molecular Function: zinc ion binding (GO:0008270);; Biological Process: regulation of interferon-beta production (GO:0032648);; Biological Process: positive regulation of I-kappaB kinase/NF-kappaB signaling (GO:0043123);; Biological Process: proteasome-mediated ubiquitin-dependent protei…	K12014|0|oas:101114398|K12014 tripartite motif-containing protein 38 [EC:2.3.2.27] | (RefSeq) TRIM38; tripartite motif containing 38	--	[O]
Ovis_aries_newGene_37546	--	0.47313	19	0.195031	10	0.411283	25	0.467277	23	0.235919	10	0.496857	28	0.214862	6	0.068563	2	0.176945	6	0.314187	19	0.348891	17	0.426974	21	0.944709	0.0857319	normal	0.531813	-0.53016	normal	0.996772	0.00769344	normal	0.383651	-0.801022	normal	0.969694	0.0817723	normal	0.483257	-0.564079	normal	--	--	--	--	--	--
Ovis_aries_newGene_19110	--	0	0	0.419648	6	0	0	0	0	0	0	0	0	0	0	0	0	0	0	0	0	0.130231	2	0	0	0.839625	-0.0632519	normal	0.742782	-0.129019	normal	0.954542	-0.0251988	normal	--	--	--	0.895549	-0.0501712	normal	0.775035	-0.0969574	normal	--	--	Cellular Component: voltage-gated sodium channel complex (GO:0001518);; Molecular Function: RNA-directed DNA polymerase activity (GO:0003964);; Molecular Function: protein kinase activity (GO:0004672);; Molecular Function: voltage-gated sodium channel activity (GO:0005248);; Molecular Function: phospholipid binding (GO:0005543);; Cellular Component: proteinaceous extracellular matrix (GO:0005578)…	K09228|1.69575e-29|bta:100138479|K09228 KRAB domain-containing zinc finger protein | (RefSeq) zinc finger protein 510	--	--
gene15970	FBXO2	2.60808	155	2.91748	220	3.59745	328	2.3122	167	2.54603	152	3.20052	273	2.1998	94	2.57828	114	2.1575	94	2.51713	224	2.23748	166	3.16469	228	0.872377	-0.12599	normal	0.391829	-0.36951	normal	0.889302	-0.163985	normal	0.659448	-0.24416	normal	0.983327	0.0385277	normal	0.748521	-0.185626	normal	--	--	Molecular Function: amyloid-beta binding (GO:0001540);; Molecular Function: protein binding (GO:0001948);; Cellular Component: endoplasmic reticulum (GO:0005783);; Cellular Component: cytosol (GO:0005829);; Biological Process: glycoprotein catabolic process (GO:0006516);; Cellular Component: SCF ubiquitin ligase complex (GO:0019005);; Molecular Function: carbohydrate binding (GO:0030246);; Biolog…	K10099|0|oas:101112079|K10099 F-box protein 2 | (RefSeq) FBXO2; F-box protein 2	Ubiquitin mediated proteolysis (ko04120);; Protein processing in endoplasmic reticulum (ko04141)	--
gene16012	SLC2A5	0.116141	13	0.164625	23	0.293249	48	0.425247	55	0.22247	24	0.752099	115	0.125281	10	0.196214	16	0.042473	4	0.445608	71	0.440965	59	0.526281	68	0.334231	0.57604	normal	0.740746	-0.320057	normal	0.178851	0.659779	normal	0.0760529	-1.27553	normal	0.998146	0.0107619	normal	0.0294854	-1.19247	down	[G]	Carbohydrate transport and metabolism	Molecular Function: fructose transmembrane transporter activity (GO:0005353);; Biological Process: fructose transport (GO:0015755);; Cellular Component: integral component of membrane (GO:0016021);; Cellular Component: apical plasma membrane (GO:0016324);; Biological Process: transmembrane transport (GO:0055085);; Biological Process: cellular response to fructose stimulus (GO:0071332);;	K08143|0|oas:443507|K08143 MFS transporter, SP family, solute carrier family 2 (facilitated glucose/fructose transporter), member 5 | (RefSeq) SLC2A5; solute carrier family 2 (facilitated glucose/fructose transporter), member 5	Carbohydrate digestion and absorption (ko04973)	[G]
gene15611	LOC106990697	0	0	0	0	0	0	0	0	0	0	0	0	0	0	0	0	0	0	0	0	0	0	0	0	--	--	--	--	--	--	--	--	--	--	--	--	--	--	--	--	--	--	--	--	Molecular Function: G-protein coupled receptor activity (GO:0004930);; Molecular Function: olfactory receptor activity (GO:0004984);; Cellular Component: plasma membrane (GO:0005886);; Biological Process: G-protein coupled receptor signaling pathway (GO:0007186);; Cellular Component: integral component of membrane (GO:0016021);; Biological Process: detection of chemical stimulus involved in senso…	K04257|0|oas:106990697|K04257 olfactory receptor | (RefSeq) olfactory receptor 10AG1-like	Olfactory transduction (ko04740)	--
gene12080	ARG2	2.08851	293	2.1016	419	2.54062	687	0.497909	44	1.06411	207	0.76811	131	1.5574	136	1.46286	141	1.59297	169	1.74903	379	1.50227	222	1.11454	174	0.0328643	-0.925176	normal	0.0140606	-0.756851	normal	0.0550863	-0.684547	normal	0.348189	0.683455	normal	0.699424	-0.401125	normal	0.929138	0.0630412	normal	[E]	Amino acid transport and metabolism	Biological Process: urea cycle (GO:0000050);; Biological Process: ureteric bud development (GO:0001657);; Molecular Function: arginase activity (GO:0004053);; Cellular Component: mitochondrion (GO:0005739);; Biological Process: arginine metabolic process (GO:0006525);; Biological Process: striated muscle contraction (GO:0006941);; Molecular Function: metal ion binding (GO:0046872);;	K01476|0|oas:780468|K01476 arginase [EC:3.5.3.1] | (RefSeq) ARG2; arginase 2	Arginine biosynthesis (ko00220);; Arginine and proline metabolism (ko00330);; Biosynthesis of amino acids (ko01230);; Amoebiasis (ko05146)	[E]
Ovis_aries_newGene_19795	--	0.265088	9	0.079927	4	0.120046	7	0.400122	16	0.030676	2	0.078469	4	0.090778	3	0.499678	13	0.210495	6	0.123443	7	0.051281	3	0.28033	12	0.973596	0.0328162	normal	0.739708	0.324695	normal	0.996176	0.00712079	normal	0.802153	0.286878	normal	0.989242	0.0225146	normal	0.752738	0.284212	normal	--	--	--	--	--	--
gene17738	OGFOD1	13.8226	1573	12.2738	1870	10.6747	2014	7.42908	1403	8.36513	1367	11.1523	2105	10.3879	1201	7.56452	964	9.18977	1104	10.8834	1953	7.41922	1512	7.78596	1528	0.839625	-0.0959876	normal	0.950357	0.0259122	normal	0.575597	-0.193818	normal	0.700417	0.122169	normal	0.895075	0.0915874	normal	0.370171	0.221221	normal	--	--	Molecular Function: iron ion binding (GO:0005506);; Cellular Component: nucleus (GO:0005634);; Cellular Component: cytoplasm (GO:0005737);; Molecular Function: oxidoreductase activity, acting on single donors with incorporation of molecular oxygen, incorporation of two atoms of oxygen (GO:0016702);; Molecular Function: oxidoreductase activity, acting on paired donors, with incorporation or reduct…	--	--	[B]
gene3914	LOC101102627	3.9243	169	3.7763	207	4.30516	285	3.28717	172	3.8176	165	4.23972	262	3.1663	98	2.44331	78	0.215798	7	3.44966	222	3.2466	175	3.52465	184	0.951195	-0.0490009	normal	0.445961	-0.599506	normal	0.81984	-0.204229	normal	0.427681	-0.699948	normal	0.895075	0.14884	normal	0.608033	-0.458981	normal	--	--	Cellular Component: nucleosome (GO:0000786);; Molecular Function: DNA binding (GO:0003677);; Cellular Component: nucleus (GO:0005634);; Biological Process: nucleosome assembly (GO:0006334);; Molecular Function: protein heterodimerization activity (GO:0046982);;	K11253|1.02042e-101|oas:101102627|K11253 histone H3 | (RefSeq) histone H3.3-like	Alcoholism (ko05034);; Transcriptional misregulation in cancer (ko05202);; Systemic lupus erythematosus (ko05322)	[B]
Ovis_aries_newGene_59480	--	0.167934	17	0.085128	11	0.173536	26	0.11526	14	0.229359	23	0.104225	15	0.14606	11	0.085013	7	0.08595	7	0.187854	28	0.124134	15	0.137823	17	0.979322	0.0343113	normal	0.866914	-0.177032	normal	0.988941	0.0295239	normal	0.812487	-0.265461	normal	0.999582	0.0010362	normal	0.810908	-0.225546	normal	--	--	Cellular Component: cytoplasm (GO:0005737);; Biological Process: snRNA processing (GO:0016180);; Cellular Component: integrator complex (GO:0032039);;	K06797|2.05827e-06|oas:101122716|K06797 cadherin 4, type 1, R-cadherin | (RefSeq) CDH4; cadherin 4	Cell adhesion molecules (CAMs) (ko04514)	--
gene16193	KLHL20	6.82673	1195	7.13911	1559	6.34967	1736	5.68284	1227	7.74393	1336	6.09475	1501	7.17559	875	8.05395	1031	7.72056	950	6.34724	1646	6.75348	1496	5.99685	1343	0.942692	-0.0420241	normal	0.659604	0.122484	normal	0.917856	-0.0572437	normal	0.596464	0.162047	normal	0.995374	0.00792206	normal	0.454212	0.176923	normal	[M]	Cell wall/membrane/envelope biogenesis	Molecular Function: actin binding (GO:0003779);; Molecular Function: ubiquitin-protein transferase activity (GO:0004842);; Cellular Component: Golgi apparatus (GO:0005794);; Cellular Component: cell surface (GO:0009986);; Biological Process: protein ubiquitination (GO:0016567);; Cellular Component: PML body (GO:0016605);; Molecular Function: interferon-gamma binding (GO:0019964);; Cellular Compon…	K10457|0|oas:101113256|K10457 kelch-like protein 20 | (RefSeq) KLHL20; kelch like family member 20	--	[TR]
Ovis_aries_newGene_64001	--	0.46112	16	0.431158	45	0.446283	55	0.358114	36	0.53559	43	0.613561	73	0.625529	37	0.396606	25	0.485882	30	0.099836	13	0.380776	40	0.476069	48	0.802475	0.286439	normal	0.688189	0.360323	normal	0.982216	-0.0419389	normal	0.993149	-0.00922634	normal	0.886562	0.270671	normal	0.70556	0.370555	normal	--	--	Biological Process: regulation of cytokine-mediated signaling pathway (GO:0001959);; Molecular Function: ion channel activity (GO:0005216);; Molecular Function: binding (GO:0005488);; Cellular Component: cytoplasm (GO:0005737);; Biological Process: regulation of macromolecule biosynthetic process (GO:0010556);; Cellular Component: membrane (GO:0016020);; Biological Process: regulation of cellular…	--	--	--
Ovis_aries_newGene_26617	--	0	0	0.598221	48	1.66423	159	2.92229	220	0	0	0	0	0	0	0.86672	40	0	0	2.05665	191	1.34754	105	0	0	0.979756	0.0104467	normal	0.89081	-0.0652016	normal	0.977753	0.0202221	normal	0.833986	-0.138491	normal	0.998051	-0.00324996	normal	0.843651	-0.0832938	normal	--	--	--	--	--	--
gene23939	LOC101118315	0.040953	8	0.046069	11	0.047843	13	0.038677	9	0.014567	3	0.042961	11	0.06739	9	0	0	0.015993	3	0.033817	9	0.027131	6	0.05088	11	0.9055	-0.125991	normal	0.850226	-0.174426	normal	0.946286	-0.0980536	normal	0.962148	-0.0649941	normal	0.98977	-0.0244351	normal	0.941517	-0.0728974	normal	[C]	Energy production and conversion	Molecular Function: L-lactate dehydrogenase activity (GO:0004459);; Cellular Component: cytoplasm (GO:0005737);; Biological Process: glycolytic process (GO:0006096);; Biological Process: ATP biosynthetic process (GO:0006754);; Biological Process: lactate biosynthetic process from pyruvate (GO:0019244);; Biological Process: lactate oxidation (GO:0019516);; Biological Process: flagellated sperm mot…	K00016|0|oas:101118315|K00016 L-lactate dehydrogenase [EC:1.1.1.27] | (RefSeq) LDHC; L-lactate dehydrogenase C chain	Glycolysis / Gluconeogenesis (ko00010);; Cysteine and methionine metabolism (ko00270);; Pyruvate metabolism (ko00620);; Propanoate metabolism (ko00640);; Glucagon signaling pathway (ko04922)	[C]
Ovis_aries_newGene_65405	--	0.348638	11	0.254198	10	0.226156	11	0	0	0	0	0	0	0.539499	12	0.422931	10	0.725013	17	0.131762	7	0	0	0.106506	4	0.159415	-0.526723	normal	0.458213	0.589092	normal	0.771751	-0.24197	normal	0.00192181	2.09604	up	0.878809	-0.102035	normal	0.14913	0.879828	normal	--	--	Cellular Component: cytoplasm (GO:0005737);; Cellular Component: focal adhesion (GO:0005925);; Biological Process: negative regulation of stress fiber assembly (GO:0051497);; Biological Process: negative regulation of protein localization to plasma membrane (GO:0090005);;	--	--	[R]
gene27995	LOC101112889	0	0	0	0	0	0	0	0	0	0	0	0	0	0	0	0	0	0	0	0	0	0	0	0	--	--	--	--	--	--	--	--	--	--	--	--	--	--	--	--	--	--	--	--	--	--	--	[S]
Ovis_aries_newGene_31834	--	0	0	0	0	0	0	0	0	0.398871	10	0.03098	2	0.111114	2	0	0	0	0	0	0	0.035672	2	0	0	0.768179	0.124535	normal	0.740203	0.126773	normal	0.889302	0.0423282	normal	0.750533	-0.234763	normal	0.895075	0.0994989	normal	0.943166	0.0327202	normal	--	--	--	--	--	--
gene2454	TSC22D2	11.4512	2754	12.1304	3728	11.3327	4204	11.8897	3482	13.0831	3163	11.9899	4160	10.5409	1820	11.7821	2097	11.5586	2042	12.049	4346	11.5014	3464	11.1381	3255	0.740755	0.106346	normal	0.812034	-0.0590461	normal	0.989209	-0.0097859	normal	0.357698	-0.172125	normal	0.796159	0.109626	normal	0.831878	-0.0530062	normal	--	--	Molecular Function: transcription factor activity, sequence-specific DNA binding (GO:0003700);; Biological Process: regulation of transcription, DNA-templated (GO:0006355);; Biological Process: response to osmotic stress (GO:0006970);;	--	--	[K]
gene28061	MOSPD1	10.0771	1386	9.04937	1584	9.7862	2073	15.747	2632	11.9533	1654	10.0594	1994	12.8111	1265	10.3706	1057	13.0547	1316	11.3538	2342	11.3236	1949	14.0843	2352	0.310532	0.373681	normal	0.160717	0.301318	normal	0.226093	0.323543	normal	0.80506	-0.110714	normal	0.969567	0.0556633	normal	0.924956	-0.0423619	normal	--	--	Biological Process: negative regulation of transcription from RNA polymerase II promoter (GO:0000122);; Molecular Function: structural molecule activity (GO:0005198);; Cellular Component: nucleus (GO:0005634);; Cellular Component: integral component of membrane (GO:0016021);; Biological Process: positive regulation of transcription from RNA polymerase II promoter (GO:0045944);; Cellular Component…	--	--	[U]
Ovis_aries_newGene_5112	--	0.173568	26	0.101064	19	0.157708	36	0.123009	23	0.108417	17	0.374161	80	0.114076	13	0.091911	11	0	0	0.062166	14	0.189247	35	0.027242	5	0.839625	0.229525	normal	0.724345	-0.347082	normal	0.889302	-0.175273	normal	0.469665	-0.714872	normal	0.760197	0.333515	normal	0.926876	-0.091303	normal	--	--	--	--	--	--
gene23654	JARID2	11.5187	2775	10.3285	3490	11.3113	3851	13.1169	3947	14.7593	3453	12.2969	4274	11.1444	1940	9.05495	1711	8.79647	1653	13.7655	4707	12.3347	3569	13.9369	3937	0.135709	0.284958	normal	0.546545	-0.153645	normal	0.475046	0.196767	normal	0.00883356	-0.450566	normal	0.895075	0.0802219	normal	0.0538282	-0.357814	normal	--	--	Biological Process: negative regulation of transcription from RNA polymerase II promoter (GO:0000122);; Biological Process: liver development (GO:0001889);; Molecular Function: DNA binding (GO:0003677);; Molecular Function: chromatin binding (GO:0003682);; Biological Process: negative regulation of cell proliferation (GO:0008285);; Biological Process: negative regulation of histone methylation (G…	K11478|0|oas:101113542|K11478 protein Jumonji | (RefSeq) JARID2; jumonji and AT-rich interaction domain containing 2	Signaling pathways regulating pluripotency of stem cells (ko04550)	[R]
gene22432	DNAH1	0.08854	80	0.072179	83	0.172733	165	0.605335	268	0.128256	117	0.232223	173	0.042789	28	0.102673	69	0.037004	25	0.552954	154	0.270117	141	0.141587	142	0.227346	0.611015	normal	0.581728	-0.4393	normal	0.770332	0.293792	normal	0.0322635	-1.22794	down	0.72121	0.352146	normal	0.185619	-0.755066	normal	--	--	--	K10408|0|oas:101112094|K10408 dynein heavy chain, axonemal | (RefSeq) DNAH1; dynein axonemal heavy chain 1	Huntington's disease (ko05016)	[Z]
gene19338	ZNF215	7.31517	1509	7.91357	2101	7.3806	2362	6.38668	1667	7.94273	1686	5.66348	1757	5.49887	845	8.1891	1163	6.741	983	7.37855	2373	8.11568	2013	5.77225	1285	0.839625	-0.104027	normal	0.492611	-0.205597	normal	0.889302	-0.126722	normal	0.781736	-0.103565	normal	0.98733	0.0230264	normal	0.897812	-0.0673643	normal	--	--	Molecular Function: RNA polymerase II transcription factor activity, sequence-specific DNA binding (GO:0000981);; Molecular Function: nucleic acid binding (GO:0003676);; Cellular Component: nucleus (GO:0005634);; Biological Process: regulation of transcription from RNA polymerase II promoter (GO:0006357);; Molecular Function: metal ion binding (GO:0046872);;	K09229|0|oas:101113007|K09229 KRAB and SCAN domains-containing zinc finger protein | (RefSeq) ZNF215; zinc finger protein 215	--	[R]
gene19980	SSRP1	49.5167	6626	66.916	8759	43.8059	9031	50.8189	8264	57.8452	7785	53.9323	10400	44.9091	4314	37.9941	3769	38.5987	3786	68.032	11209	69.985	8770	56.6657	9206	0.436352	0.18876	normal	0.182768	-0.262086	normal	0.538362	0.181542	normal	0.00145877	-0.462304	normal	0.999368	-0.000551765	normal	0.00222509	-0.452566	normal	--	--	Molecular Function: DNA binding (GO:0003677);; Molecular Function: chromatin binding (GO:0003682);; Cellular Component: nucleus (GO:0005634);; Cellular Component: cytoplasm (GO:0005737);;	K09272|0|oas:101104524|K09272 structure-specific recognition protein 1 | (RefSeq) SSRP1; structure specific recognition protein 1	--	[KLB]
gene26344	CHST12	7.31449	1133	6.38522	1216	6.85313	1383	7.81475	1216	5.91395	717	5.64733	1220	8.58364	899	5.09121	565	6.37049	578	6.66186	1568	5.14524	1049	7.33009	1160	0.826044	-0.166128	normal	0.854564	-0.0998032	normal	0.940427	-0.0646757	normal	0.909005	0.0698838	normal	0.908553	-0.108481	normal	0.949324	-0.0375016	normal	--	--	Cellular Component: integral component of membrane (GO:0016021);; Biological Process: carbohydrate biosynthetic process (GO:0016051);; Biological Process: chondroitin sulfate biosynthetic process (GO:0030206);; Biological Process: dermatan sulfate biosynthetic process (GO:0030208);; Molecular Function: chondroitin 4-sulfotransferase activity (GO:0047756);;	K04742|0|oas:101118845|K04742 chondroitin 4-sulfotransferase 12 [EC:2.8.2.5] | (RefSeq) CHST12; carbohydrate sulfotransferase 12	Glycosaminoglycan biosynthesis - chondroitin sulfate / dermatan sulfate (ko00532)	[MW]
Ovis_aries_newGene_28964	--	0.093433	2	0.125243	2	0.201345	4	0.307482	5	0.258204	3	0.347047	6	0.117126	1	0	0	0.080773	1	0.018411	1	0.112792	2	0.156459	3	0.839625	0.15428	normal	0.80444	-0.172935	normal	0.971058	-0.0405309	normal	0.592464	-0.518329	normal	0.895075	0.18383	normal	0.889736	-0.0980497	normal	--	--	Molecular Function: actin binding (GO:0003779);; Molecular Function: RNA-directed DNA polymerase activity (GO:0003964);; Molecular Function: phospholipid binding (GO:0005543);; Cellular Component: proteinaceous extracellular matrix (GO:0005578);; Cellular Component: plasma membrane (GO:0005886);; Biological Process: RNA-dependent DNA biosynthetic process (GO:0006278);; Cellular Component: anchore…	K08111|4.05448e-26|bom:102284894|K08111 glypican 5 | (RefSeq) GPC5, Glypican-5; glypican 5	--	--
Ovis_aries_newGene_52345	--	0.076678	12	0.064969	13	0.083243	19	0.168234	30	0	0	0.120072	26	0.015452	2	0.252377	28	2.35261	252	0.023553	6	0.02204	5	0	0	0.944595	0.0683666	normal	0.071482	1.04272	normal	0.547468	-0.349465	normal	0.471422	0.60107	normal	0.776736	0.217841	normal	0.0535063	1.01679	normal	--	--	Biological Process: detection of chemical stimulus involved in sensory perception of bitter taste (GO:0001580);; Molecular Function: RNA binding (GO:0003723);; Molecular Function: metalloendopeptidase activity (GO:0004222);; Molecular Function: G-protein coupled receptor activity (GO:0004930);; Molecular Function: ion channel activity (GO:0005216);; Molecular Function: ATP binding (GO:0005524);; …	K08474|1.13076e-32|bta:664647|K08474 taste receptor type 2 | (RefSeq) T2R65A; bitter taste receptor Bota-T2R65A	--	--
Ovis_aries_newGene_43772	--	0	0	0	0	0	0	0.08302	2	0.401238	5	0	0	0	0	0	0	0	0	0	0	0	0	0	0	0.833379	0.0902722	normal	--	--	--	--	--	--	0.696	-0.23007	normal	0.895075	0.0867606	normal	--	--	--	--	--	Molecular Function: nucleic acid binding (GO:0003676);; Molecular Function: RNA-directed DNA polymerase activity (GO:0003964);; Cellular Component: intracellular (GO:0005622);; Cellular Component: fascia adherens (GO:0005916);; Biological Process: RNA-dependent DNA biosynthetic process (GO:0006278);; Biological Process: regulation of transcription, DNA-templated (GO:0006355);; Molecular Function:…	K09228|1.29297e-36|bta:100138479|K09228 KRAB domain-containing zinc finger protein | (RefSeq) zinc finger protein 510	--	--
gene20251	FAM159B	0.085413	4	0.053873	3	0.035348	2	0.069765	4	0.065387	3	0.183399	10	0	0	0	0	0.230853	7	0.30094	17	0.064905	3	0.047956	3	0.842559	0.14947	normal	0.961046	0.0394601	normal	0.889302	0.15012	normal	0.918836	-0.116586	normal	0.977315	-0.0476306	normal	0.881762	-0.109673	normal	--	--	Cellular Component: integral component of membrane (GO:0016021);;	--	--	--
gene3576	PLIN2	146.305	11867	145.81	14983	151.493	18906	128.772	12120	69.7427	5943	124.202	14692	223.698	13331	215.109	13218	188.5	11644	137.714	16761	208.745	21294	205.357	20167	0.394578	-0.367962	normal	3.14079e-05	0.51932	normal	0.540742	0.286416	normal	0.00113882	0.903658	normal	0.101205	-0.617397	normal	0.656606	0.189799	normal	--	--	Cellular Component: nucleus (GO:0005634);; Cellular Component: lipid droplet (GO:0005811);; Cellular Component: plasma membrane (GO:0005886);; Biological Process: long-chain fatty acid transport (GO:0015909);; Biological Process: lipid storage (GO:0019915);;	K17284|0|oas:100125354|K17284 perilipin-2 | (RefSeq) PLIN2, ADFP; perilipin 2	PPAR signaling pathway (ko03320)	--
gene20216	AK6	9.20053	564	7.94937	664	8.08206	739	9.95591	735	6.53377	359	10.0862	869	11.908	475	11.3116	483	14.6763	574	11.36	1011	11.3121	782	10.8925	827	0.972815	0.0318247	normal	0.0860851	0.39267	normal	0.190167	0.320093	normal	0.449316	0.341816	normal	0.791475	-0.258479	normal	0.873464	0.0592419	normal	[F]	Nucleotide transport and metabolism	Cellular Component: PCAF complex (GO:0000125);; Molecular Function: p53 binding (GO:0002039);; Molecular Function: transcription coactivator activity (GO:0003713);; Molecular Function: adenylate kinase activity (GO:0004017);; Molecular Function: histone acetyltransferase activity (GO:0004402);; Molecular Function: ATP binding (GO:0005524);; Cellular Component: transcription factor TFIID complex (…	K18532|8.50977e-124|oas:102238525|K18532 adenylate kinase [EC:2.7.4.3] | (RefSeq) AK6; adenylate kinase 6	Purine metabolism (ko00230);; Ribosome biogenesis in eukaryotes (ko03008)	[F]
gene18231	EGLN2	6.13598	3759	15.1775	3884	6.85944	4875	13.6838	2997	7.91076	2798	5.6781	5624	11.8083	1839	8.81743	1643	13.1398	2049	16.7895	4452	5.85354	4956	7.11663	3741	0.903071	-0.086312	normal	0.0529495	-0.400364	normal	0.996014	0.00606845	normal	0.348685	-0.310518	normal	0.932286	-0.0955889	normal	0.090024	-0.405821	normal	[JO]	Translation, ribosomal structure and biogenesis;; Posttranslational modification, protein turnover, chaperones	Biological Process: response to hypoxia (GO:0001666);; Molecular Function: iron ion binding (GO:0005506);; Cellular Component: nucleus (GO:0005634);; Biological Process: peptidyl-proline hydroxylation to 4-hydroxy-L-proline (GO:0018401);; Molecular Function: oxygen sensor activity (GO:0019826);; Molecular Function: L-ascorbic acid binding (GO:0031418);; Molecular Function: peptidyl-proline 4-diox…	K09592|0|oas:101120517|K09592 hypoxia-inducible factor prolyl hydroxylase [EC:1.14.11.29] | (RefSeq) EGLN2; egl-9 family hypoxia inducible factor 2	HIF-1 signaling pathway (ko04066);; Pathways in cancer (ko05200);; Renal cell carcinoma (ko05211)	[T]
Ovis_aries_newGene_8018	--	11.3221	822	15.9993	1472	8.14609	909	22.1082	1940	19.6618	1426	20.789	2163	10.6495	578	9.38306	508	9.50528	509	15.8708	1726	16.7167	1512	20.6108	1810	0.0225981	0.71192	normal	0.691723	-0.226136	normal	0.293871	0.467536	normal	4.37398e-10	-1.07748	down	0.63676	0.232827	normal	0.000108631	-0.80316	normal	--	--	Molecular Function: GTPase activity (GO:0003924);; Molecular Function: structural constituent of cytoskeleton (GO:0005200);; Molecular Function: GTP binding (GO:0005525);; Cellular Component: cytoplasm (GO:0005737);; Cellular Component: microtubule (GO:0005874);; Biological Process: microtubule-based process (GO:0007017);;	K07375|0|cjo:107309619|K07375 tubulin beta | (RefSeq) tubulin beta-1 chain	Phagosome (ko04145);; Gap junction (ko04540)	[Z]
Ovis_aries_newGene_50339	--	3.87097	208	4.67241	320	3.68857	306	7.8991	491	5.55136	300	7.00377	542	4.63148	179	2.84152	114	4.76086	188	4.91521	396	4.34398	292	6.19915	405	0.026744	0.64895	normal	0.987095	-0.0125272	normal	0.680464	0.28271	normal	0.0575055	-0.715031	normal	0.57323	0.340035	normal	0.566335	-0.316783	normal	--	--	--	--	--	--
gene22113	ARPP21	0.033458	8	0.044025	13	0.044782	16	0.054504	16	0.034375	8	0.055015	18	0.036566	6	0.679004	116	0.354206	59	0.048505	18	0.041702	13	0.007304	3	0.929558	0.104544	normal	0.0169857	1.34824	up	0.975961	-0.0512428	normal	0.0206435	1.63517	up	0.931131	0.133593	normal	0.0263104	1.24235	up	--	--	--	--	--	[A]
Ovis_aries_newGene_62350	--	0.629656	82	0.600582	109	0.163006	60	1.3699	362	1.39176	212	0.067187	36	2.17426	267	0.014654	4	0.007483	2	0.458948	162	0.26633	122	0.952274	161	0.38233	0.534506	normal	0.773439	0.249188	normal	0.511995	0.452154	normal	0.899733	-0.147449	normal	0.878435	0.274834	normal	0.976321	0.0265052	normal	--	--	Molecular Function: nucleic acid binding (GO:0003676);; Molecular Function: actin binding (GO:0003779);; Molecular Function: phospholipid binding (GO:0005543);; Cellular Component: proteinaceous extracellular matrix (GO:0005578);; Cellular Component: mitochondrion (GO:0005739);; Cellular Component: plasma membrane (GO:0005886);; Cellular Component: adherens junction (GO:0005912);; Biological Proc…	K09228|2.37922e-43|bta:100138479|K09228 KRAB domain-containing zinc finger protein | (RefSeq) zinc finger protein 510	--	--
gene3218	RHOBTB2	5.36905	567	5.9026	734	5.65666	871	3.46793	475	4.86421	365	4.16784	590	2.77325	229	3.13048	257	4.30891	318	4.81668	751	4.20609	602	3.83888	535	0.0111351	-0.492007	normal	0.00627244	-0.622001	normal	0.368267	-0.248596	normal	0.756245	-0.128069	normal	0.538438	-0.247388	normal	0.204878	-0.371038	normal	--	--	Molecular Function: nucleotide binding (GO:0000166);;	K07868|0|oas:443007|K07868 Rho-related BTB domain-containing protein 1/2 | (RefSeq) RHOBTB2, NOVOCAN; Rho related BTB domain containing 2	Ubiquitin mediated proteolysis (ko04120)	[R]
gene9935	POU4F3	0	0	0.027872	2	0	0	0	0	0.157813	9	0	0	0	0	0.051551	2	0	0	0	0	0.031709	3	0	0	0.876373	0.0542349	normal	0.943177	0.0336472	normal	0.986212	0.0100337	normal	0.853878	-0.122681	normal	0.940639	0.0421777	normal	0.98575	0.00778979	normal	--	--	Molecular Function: transcription factor activity, sequence-specific DNA binding (GO:0003700);; Cellular Component: nucleus (GO:0005634);; Biological Process: regulation of transcription from RNA polymerase II promoter (GO:0006357);; Biological Process: sensory perception of sound (GO:0007605);; Biological Process: vestibulocochlear nerve development (GO:0021562);; Biological Process: retinal gan…	K09366|0|phd:102340194|K09366 POU domain transcription factor, class 4 | (RefSeq) POU4F3; POU class 4 homeobox 3	--	[K]
Ovis_aries_newGene_43945	--	0.650794	59	0.104358	13	1.12831	113	0.153985	22	0.13477	15	0.270202	27	0.129193	11	0	0	0.116215	10	0.637864	107	0.554042	54	0.540672	51	0.394649	-0.524045	normal	0.242146	-0.771738	normal	0.980317	0.0471224	normal	0.700102	-0.419616	normal	0.0370077	-0.910099	normal	0.0820529	-1.04501	normal	--	--	--	--	--	--
gene22731	KLF15	1.35682	283	1.0444	277	1.59648	512	1.53565	388	1.58196	331	1.66176	498	1.05412	158	1.46498	226	0.801336	123	2.37429	741	1.87902	489	2.08628	527	0.676102	0.248263	normal	0.712664	-0.243993	normal	0.0709483	0.560661	normal	0.178263	-0.533306	normal	0.261268	-0.354875	normal	0.010943	-0.849702	normal	[R]	General function prediction only	Molecular Function: DNA binding (GO:0003677);; Molecular Function: transcription factor activity, sequence-specific DNA binding (GO:0003700);; Cellular Component: nucleolus (GO:0005730);; Biological Process: glial cell differentiation (GO:0010001);; Biological Process: glucose transport (GO:0015758);; Biological Process: positive regulation of transcription from RNA polymerase II promoter (GO:004…	K09210|1.07622e-150|ssc:100174957|K09210 krueppel-like factor 15 | (RefSeq) KLF15; Kruppel like factor 15	--	[R]
gene11100	ATP5I	70.1562	850	60.9368	954	71.2108	1344	67.9664	1008	45.3825	552	64.9112	1144	53.0242	463	67.2898	606	70.4483	630	59.5932	1085	75.9408	1156	69.4914	1039	0.840366	-0.131598	normal	0.793367	-0.0999888	normal	0.988004	0.0177702	normal	0.95094	0.0374647	normal	0.895075	-0.152218	normal	0.765656	-0.121571	normal	--	--	--	--	--	--
gene18426	SLC8A2	0.169612	24	0.308072	55	0.228131	49	0.34256	58	0.262985	37	0.308089	62	0.098948	10	0.194527	20	0.232543	24	0.265888	56	0.312337	55	0.219333	37	0.838088	0.249376	normal	0.74299	-0.29459	normal	0.952626	0.0978157	normal	0.383306	-0.665109	normal	0.926232	0.144916	normal	0.616491	-0.423217	normal	[R]	General function prediction only	Molecular Function: calcium:sodium antiporter activity (GO:0005432);; Biological Process: calcium ion transport (GO:0006816);; Biological Process: cell communication (GO:0007154);; Cellular Component: integral component of membrane (GO:0016021);; Biological Process: transmembrane transport (GO:0055085);;	K05849|0|oas:101102171|K05849 solute carrier family 8 (sodium/calcium exchanger) | (RefSeq) SLC8A2; solute carrier family 8 member A2	Calcium signaling pathway (ko04020);; cGMP-PKG signaling pathway (ko04022);; Olfactory transduction (ko04740);; Protein digestion and absorption (ko04974)	[PT]
Ovis_aries_newGene_31155	--	0	0	0.068537	3	0.106711	6	0	0	0	0	0.295687	15	0	0	0.098691	3	0	0	0.081585	5	0.145917	7	0	0	0.946724	0.0356534	normal	0.938201	-0.047836	normal	0.973371	0.0300747	normal	0.872891	-0.114068	normal	0.989488	0.0123272	normal	0.878081	-0.0875944	normal	--	--	--	--	--	--
gene11584	LOC101121605	0	0	0	0	0	0	0	0	0	0	0	0	0	0	0	0	0	0	0	0	0	0	0	0	--	--	--	--	--	--	--	--	--	--	--	--	--	--	--	--	--	--	--	--	Molecular Function: G-protein coupled receptor activity (GO:0004930);; Molecular Function: olfactory receptor activity (GO:0004984);; Cellular Component: plasma membrane (GO:0005886);; Biological Process: G-protein coupled receptor signaling pathway (GO:0007186);; Cellular Component: integral component of membrane (GO:0016021);; Biological Process: detection of chemical stimulus involved in senso…	K04257|0|oas:101121605|K04257 olfactory receptor | (RefSeq) olfactory receptor 4F3/4F16/4F29-like	Olfactory transduction (ko04740)	--
gene5968	SPR	11.5179	854	12.8562	1213	15.0669	1720	13.0723	1177	13.7772	1027	18.1738	1941	15.5731	829	8.13207	447	15.9999	869	12.6022	1401	15.0047	1392	13.3764	1204	0.739077	0.198195	normal	0.992506	-0.00742691	normal	0.958104	0.0509996	normal	0.694031	-0.21719	normal	0.895075	0.142336	normal	0.926137	-0.0621058	normal	[IQR]	Lipid transport and metabolism;; Secondary metabolites biosynthesis, transport and catabolism;; General function prediction only	Molecular Function: sepiapterin reductase activity (GO:0004757);; Cellular Component: nucleus (GO:0005634);; Cellular Component: cytoplasm (GO:0005737);; Biological Process: tetrahydrobiopterin biosynthetic process (GO:0006729);; Biological Process: nitric oxide biosynthetic process (GO:0006809);; Biological Process: oxidation-reduction process (GO:0055114);;	K00072|3.55711e-168|oas:101111439|K00072 sepiapterin reductase [EC:1.1.1.153] | (RefSeq) SPR; sepiapterin reductase (7,8-dihydrobiopterin:NADP+ oxidoreductase)	Folate biosynthesis (ko00790)	[Q]
gene64	RAMP1	5.46604	267	2.46622	365	3.84105	275	9.12595	509	2.88164	311	10.5099	465	1.57872	145	1.71652	118	4.06484	181	3.69202	664	8.57431	331	1.88274	306	0.305899	0.45776	normal	0.687916	-0.251221	normal	0.789638	0.28691	normal	0.0216079	-0.793635	normal	0.923613	0.126848	normal	0.17911	-0.588807	normal	--	--	Biological Process: angiogenesis (GO:0001525);; Molecular Function: calcitonin receptor activity (GO:0004948);; Cellular Component: plasma membrane (GO:0005886);; Biological Process: calcium ion transport (GO:0006816);; Biological Process: intracellular protein transport (GO:0006886);; Biological Process: regulation of G-protein coupled receptor protein signaling pathway (GO:0008277);; Molecular …	K08447|4.58339e-109|oas:101110380|K08447 receptor activity modifying protein 1 | (RefSeq) RAMP1; receptor activity modifying protein 1	Vascular smooth muscle contraction (ko04270)	--
gene8303	CALU	43.371	7319	35.458	7750	36.2448	9478	28.0625	5764	33.4945	5640	28.0759	6867	50.6894	6097	64.4881	7888	59.8046	7271	39.3073	9988	41.7137	8912	33.3418	6950	0.116198	-0.328186	normal	0.0037002	0.539846	normal	0.998064	-0.00306645	normal	1.3355e-08	0.882697	normal	0.133035	-0.330848	normal	0.00316493	0.539995	normal	--	--	Molecular Function: calcium ion binding (GO:0005509);; Cellular Component: extracellular region (GO:0005576);; Cellular Component: sarcoplasmic reticulum lumen (GO:0033018);; Cellular Component: melanosome (GO:0042470);;	--	--	[TU]
gene28657	LOC105605824	0	0	0	0	0	0	0	0	0	0	0	0	0	0	0.917273	44	0.232059	11	0	0	0	0	0	0	--	--	--	0.252325	0.598897	normal	--	--	--	0.147957	1.03066	normal	--	--	--	0.256436	0.581511	normal	--	--	--	--	--	--
gene21849	LOC105603225	0.331387	11	0.233681	6	0.289752	14	0.702504	23	0	0	1.83661	62	0.193182	4	0.164557	4	1.03367	21	0.984868	38	0.118868	4	0.223382	7	0.795515	0.218843	normal	0.780324	0.259214	normal	0.938852	0.0938077	normal	0.816489	-0.261754	normal	0.905079	0.123664	normal	0.953351	0.0609898	normal	--	--	--	--	--	--
Ovis_aries_newGene_62095	--	0.265417	10	0.532676	25	1.50964	83	0.392868	18	0.170451	7	0.375155	20	0.557958	15	0.489041	13	0.17332	5	0.998037	54	0.543923	25	0.289608	13	0.607145	-0.392262	normal	0.650093	-0.429547	normal	0.948291	-0.0966163	normal	0.893777	0.170524	normal	0.823802	-0.31465	normal	0.754269	-0.293006	normal	--	--	--	--	--	--
Ovis_aries_newGene_75	--	0.202076	8	0.085017	5	0.07759	5	0.085777	5	0.262817	11	0.071856	4	0.036365	2	0	0	0	0	0.241139	14	0.018495	1	0.119288	6	0.959506	0.0533406	normal	0.582318	-0.373276	normal	0.999127	0.00189835	normal	0.501005	-0.593569	normal	0.982201	0.0386266	normal	0.651008	-0.299212	normal	--	--	--	--	--	--
gene2800	SATB1	8.13266	2810	8.52714	3601	16.181	4817	6.70463	2828	6.74254	2292	9.39482	3289	19.3507	2445	11.0151	2116	11.753	2366	8.84788	4455	8.57575	3401	8.02136	3331	0.0594291	-0.307148	normal	0.737703	0.0965662	normal	0.917232	-0.0533835	normal	0.0121103	0.40607	normal	0.143306	-0.260829	normal	0.524958	0.146584	normal	--	--	Biological Process: negative regulation of transcription from RNA polymerase II promoter (GO:0000122);; Molecular Function: chromatin binding (GO:0003682);; Molecular Function: transcription factor activity, sequence-specific DNA binding (GO:0003700);; Cellular Component: nuclear heterochromatin (GO:0005720);; Biological Process: chromatin remodeling (GO:0006338);; Biological Process: epidermis d…	--	--	[K]
gene13268	RAB2A	56.7095	6292	53.2358	7644	55.8636	9530	54.2774	7482	54.9658	6278	58.3496	9140	58.3955	4760	61.2709	5083	66.6278	5520	52.6107	8693	57.3415	8149	62.2727	7594	0.877359	0.0486864	normal	0.317022	0.168164	normal	0.99244	0.00751445	normal	0.59281	0.114859	normal	0.962127	0.0340111	normal	0.467957	0.155663	normal	[R]	General function prediction only	Cellular Component: Golgi membrane (GO:0000139);; Molecular Function: GTPase activity (GO:0003924);; Molecular Function: GTP binding (GO:0005525);; Cellular Component: endoplasmic reticulum membrane (GO:0005789);; Biological Process: obsolete GTP catabolic process (GO:0006184);; Biological Process: small GTPase mediated signal transduction (GO:0007264);; Biological Process: protein transport (GO:…	K07877|2.88965e-148|oas:101110853|K07877 Ras-related protein Rab-2A | (RefSeq) RAB2A; RAB2A, member RAS oncogene family	AMPK signaling pathway (ko04152)	[U]
gene7305	LOC105608615	0.266669	40	0.158464	20	0.402704	57	0.348748	33	0.166896	25	0.090654	20	0.143694	16	0.184179	16	0.082808	9	0.11786	27	0.238415	44	0.196478	35	0.839625	-0.217813	normal	0.608907	-0.452636	normal	0.964664	-0.0769355	normal	0.86054	-0.198014	normal	0.932286	-0.144756	normal	0.713107	-0.35589	normal	--	--	Molecular Function: scavenger receptor activity (GO:0005044);; Cellular Component: membrane (GO:0016020);;	--	--	--
Ovis_aries_newGene_18322	--	1.49839	114	0.843345	122	1.64212	188	1.07734	109	1.10728	91	1.57	174	1.78039	102	2.24362	133	1.5934	89	1.22958	157	1.36243	135	1.3191	122	0.925377	-0.0878539	normal	0.479948	0.359172	normal	0.958307	-0.068873	normal	0.349755	0.465509	normal	0.988638	-0.025183	normal	0.328286	0.43151	normal	--	--	--	--	--	--
gene24645	SLC16A12	0.536982	107	0.749466	172	0.41152	132	0.765205	217	0.411597	90	0.88141	221	0.708144	108	1.33707	193	1.06177	132	0.771521	202	0.869964	226	1.17702	246	0.766196	0.286022	normal	0.101711	0.718014	normal	0.318527	0.49376	normal	0.582044	0.377877	normal	0.895075	-0.189821	normal	0.824996	0.147465	normal	[G]	Carbohydrate transport and metabolism	Cellular Component: integral component of membrane (GO:0016021);; Biological Process: transmembrane transport (GO:0055085);;	K11810|0|oas:101102689|K11810 MFS transporter, MCP family, solute carrier family 16 (monocarboxylic acid transporters), member 12 | (RefSeq) SLC16A12; solute carrier family 16 member 12	--	[G]
Ovis_aries_newGene_7023	--	0	0	0.308025	56	0	0	0.46056	80	0	0	0.186382	38	0.629583	64	0	0	0.316067	33	0	0	0	0	0.387541	67	0.946272	0.0256519	normal	0.875601	0.0730233	normal	0.991107	0.00639443	normal	0.913211	0.136166	normal	0.978829	0.0170999	normal	0.904338	0.0559944	normal	--	--	Molecular Function: ion channel activity (GO:0005216);; Biological Process: ion transport (GO:0006811);; Biological Process: transmembrane transport (GO:0055085);;	--	--	--
gene26738	GHITM	68.9183	8566	61.141	9675	66.9692	12822	62.8861	9498	55.6047	6951	61.3821	10997	66.5448	5935	75.7999	6981	73.9452	6732	59.0074	11000	76.0969	11837	69.0461	10420	0.839625	-0.0953039	normal	0.635389	0.117277	normal	0.950632	0.0498021	normal	0.328473	0.210496	normal	0.855128	-0.149322	normal	0.861319	0.0602818	normal	[R]	General function prediction only	Cellular Component: mitochondrion (GO:0005739);; Cellular Component: integral component of membrane (GO:0016021);;	--	--	[T]
gene5491	ALK	0.843363	115	0.665703	191	0.370747	119	0.652327	175	0.564299	125	0.833663	171	1.94923	179	0.682112	113	0.31617	50	0.44932	148	1.18621	188	0.387351	104	0.85593	0.158447	normal	0.725707	0.320917	normal	0.99244	-0.0197622	normal	0.825123	0.191576	normal	0.895075	0.17844	normal	0.697509	0.342189	normal	[T]	Signal transduction mechanisms	Biological Process: activation of MAPK activity (GO:0000187);; Molecular Function: transmembrane receptor protein tyrosine kinase activity (GO:0004714);; Molecular Function: ATP binding (GO:0005524);; Biological Process: transmembrane receptor protein tyrosine kinase signaling pathway (GO:0007169);; Cellular Component: integral component of membrane (GO:0016021);; Biological Process: neuron devel…	K05119|0|oas:101114094|K05119 anaplastic lymphoma kinase [EC:2.7.10.1] | (RefSeq) ALK; anaplastic lymphoma receptor tyrosine kinase	Non-small cell lung cancer (ko05223)	[T]
gene19007	ATM	5.08806	2686	5.67523	3321	4.4147	3827	4.13352	2985	6.43331	2994	4.24103	3202	3.72828	1405	5.07032	2029	3.60373	1395	4.08115	3465	3.983	3140	3.78273	2050	0.995848	0.00318813	normal	0.487185	-0.23898	normal	0.661713	-0.232081	normal	0.47631	-0.250482	normal	0.744415	0.228413	normal	0.993556	0.00382107	normal	--	--	Biological Process: telomere maintenance (GO:0000723);; Cellular Component: chromosome, telomeric region (GO:0000781);; Biological Process: somitogenesis (GO:0001756);; Biological Process: pre-B cell allelic exclusion (GO:0002331);; Molecular Function: DNA-dependent protein kinase activity (GO:0004677);; Molecular Function: ATP binding (GO:0005524);; Cellular Component: spindle (GO:0005819);; Bio…	K04728|0|oas:101105847|K04728 ataxia telangiectasia mutated family protein [EC:2.7.11.1] | (RefSeq) ATM; ATM serine/threonine kinase	Platinum drug resistance (ko01524);; NF-kappa B signaling pathway (ko04064);; FoxO signaling pathway (ko04068);; Cell cycle (ko04110);; p53 signaling pathway (ko04115);; Apoptosis (ko04210);; HTLV-I infection (ko05166);; Transcriptional misregulation in cancer (ko05202);; MicroRNAs in cancer (ko05206)	[TBLD]
gene24768	NDUFB8	101.83	2850	89.6493	3195	99.6305	4296	86.866	2955	73.7558	2077	87.5434	3531	91.1415	1832	115.427	2394	118.193	2425	89.2835	3748	106.754	3740	97.5344	3315	0.621749	-0.186522	normal	0.686558	0.139035	normal	0.989497	0.0130882	normal	0.203444	0.327418	normal	0.676439	-0.204025	normal	0.740899	0.121167	normal	--	--	Cellular Component: mitochondrial respiratory chain complex I (GO:0005747);; Biological Process: mitochondrial electron transport, NADH to ubiquinone (GO:0006120);; Molecular Function: NADH dehydrogenase (ubiquinone) activity (GO:0008137);; Cellular Component: integral component of membrane (GO:0016021);;	K03964|1.50635e-135|phd:102340062|K03964 NADH dehydrogenase (ubiquinone) 1 beta subcomplex subunit 8 | (RefSeq) NDUFB8; NADH:ubiquinone oxidoreductase subunit B8	Oxidative phosphorylation (ko00190);; Non-alcoholic fatty liver disease (NAFLD) (ko04932);; Alzheimer's disease (ko05010);; Parkinson's disease (ko05012);; Huntington's disease (ko05016)	[C]
gene6483	LOC101122776	0	0	0	0	0	0	0	0	0	0	0	0	0	0	0	0	0	0	0	0	0	0	0	0	--	--	--	--	--	--	--	--	--	--	--	--	--	--	--	--	--	--	--	--	--	K04257|0|oas:101122776|K04257 olfactory receptor | (RefSeq) olfactory receptor 8S1-like	Olfactory transduction (ko04740)	--
gene2183	HRG	0	0	0	0	0	0	0	0	0	0	0	0	0	0	0	0	0	0	0	0	0	0	0	0	--	--	--	--	--	--	--	--	--	--	--	--	--	--	--	--	--	--	--	--	Biological Process: positive regulation of immune response to tumor cell (GO:0002839);; Molecular Function: serine-type endopeptidase inhibitor activity (GO:0004867);; Molecular Function: cysteine-type endopeptidase inhibitor activity (GO:0004869);; Cellular Component: extracellular region (GO:0005576);; Molecular Function: heparin binding (GO:0008201);; Molecular Function: zinc ion binding (GO:0…	--	--	--
Ovis_aries_newGene_65237	--	0	0	0.035934	3	0.052043	4	0.036774	2	0.33631	16	0.114341	8	0	0	0	0	0.123189	5	0	0	0	0	0.017306	1	0.654812	0.268051	normal	0.958601	0.0335648	normal	0.889302	-0.0625702	normal	0.686666	-0.404092	normal	0.475859	0.331623	normal	0.783421	0.104228	normal	--	--	--	--	--	--
gene23704	SNRNP48	8.26071	911	8.9912	2027	10.4956	2068	7.76478	1270	8.6791	1200	10.4872	1991	12.0166	1127	9.92196	886	10.3746	1178	9.41001	2427	8.69774	1840	9.33463	1832	0.951195	-0.0514895	normal	0.754784	0.155931	normal	0.81421	0.220268	normal	0.520371	0.217524	normal	0.286043	-0.304251	normal	0.792247	-0.0905858	normal	--	--	Cellular Component: U12-type spliceosomal complex (GO:0005689);; Cellular Component: cytoplasm (GO:0005737);;	K13156|0|oas:101118908|K13156 U11/U12 small nuclear ribonucleoprotein 48 kDa protein | (RefSeq) SNRNP48; small nuclear ribonucleoprotein U11/U12 subunit 48	--	--
Ovis_aries_newGene_48309	--	0.363319	34	0.540844	49	0.526969	74	0.225073	8	0.286465	13	0.573771	48	0.750413	26	0.958788	55	1.3731	38	0.729911	34	0.13355	16	1.08871	51	0.485033	-0.478185	normal	0.715731	0.314808	normal	0.846827	-0.285935	normal	0.151163	1.07589	normal	0.900789	-0.170608	normal	0.353155	0.65602	normal	--	--	Molecular Function: receptor binding (GO:0005102);; Biological Process: single-organism cellular process (GO:0044763);; Biological Process: positive regulation of cellular process (GO:0048522);; Biological Process: system development (GO:0048731);; Biological Process: cellular response to stimulus (GO:0051716);;	K04358|1.24706e-09|oas:780460|K04358 fibroblast growth factor | (RefSeq) FGF18; fibroblast growth factor 18	MAPK signaling pathway (ko04010);; Ras signaling pathway (ko04014);; Rap1 signaling pathway (ko04015);; PI3K-Akt signaling pathway (ko04151);; Regulation of actin cytoskeleton (ko04810);; Pathways in cancer (ko05200);; Melanoma (ko05218)	--
gene13261	NSMAF	12.4473	2228	13.9356	3095	12.2207	3216	14.0195	3046	15.0875	2721	11.6907	3313	11.1955	1314	13.1431	1530	6.85779	898	14.1894	3770	9.80412	2276	13.0753	2746	0.586712	0.175307	normal	0.256084	-0.385403	normal	0.978689	-0.0294875	normal	0.0399509	-0.577356	normal	0.757205	0.193266	normal	0.364487	-0.354886	normal	[R]	General function prediction only	--	K18953|0|oas:101110070|K18953 factor associated with neutral sphingomyelinase activation | (RefSeq) NSMAF; neutral sphingomyelinase activation associated factor	Sphingolipid signaling pathway (ko04071)	[TU]
gene19407	LOC101121451	0	0	0	0	0	0	0	0	0	0	0	0	0	0	0	0	0	0	0	0	0	0	0	0	--	--	--	--	--	--	--	--	--	--	--	--	--	--	--	--	--	--	--	--	Molecular Function: G-protein coupled receptor activity (GO:0004930);; Molecular Function: olfactory receptor activity (GO:0004984);; Cellular Component: plasma membrane (GO:0005886);; Cellular Component: integral component of membrane (GO:0016021);;	K04257|0|oas:101121451|K04257 olfactory receptor | (RefSeq) olfactory receptor 52N2	Olfactory transduction (ko04740)	--
gene16543	GATA3	17.5856	5066	21.532	6684	18.6037	7746	19.351	6467	20.9813	6103	19.9843	7167	17.7277	3469	18.2038	3827	17.2391	3285	19.0628	7310	16.7078	6110	18.8214	6787	0.763076	0.116168	normal	0.69763	-0.0967757	normal	0.998786	0.00185165	normal	0.274435	-0.220196	normal	0.895075	0.105826	normal	0.740546	-0.102711	normal	--	--	Biological Process: negative regulation of transcription from RNA polymerase II promoter (GO:0000122);; Cellular Component: nuclear chromatin (GO:0000790);; Molecular Function: RNA polymerase II core promoter sequence-specific DNA binding (GO:0000979);; Molecular Function: core promoter proximal region sequence-specific DNA binding (GO:0000987);; Molecular Function: transcriptional activator acti…	K17895|0|chx:102172821|K17895 GATA-binding protein 3 | (RefSeq) GATA3; GATA binding protein 3	--	[K]
gene13791	SUPT20H	10.5434	2502	13.0723	4046	12.4545	4281	11.7232	3430	10.9132	2505	11.9854	3921	19.8567	2963	15.2559	2756	13.634	2576	13.6293	4646	12.2685	3649	12.2566	3700	0.946268	-0.0399605	normal	0.037508	0.398808	normal	0.889302	0.0945575	normal	0.0141875	0.440426	normal	0.78254	-0.143168	normal	0.0613982	0.299775	normal	--	--	Cellular Component: SAGA complex (GO:0000124);; Molecular Function: transcription cofactor activity (GO:0003712);;	K21245|0|oas:101104410|K21245 transcription factor SPT20 homolog | (RefSeq) SUPT20H, FAM48A; SPT20 homolog, SAGA complex component	--	--
gene23938	TSG101	29.2045	2231	29.9154	2909	27.6815	3257	33.5727	3117	30.9667	2380	30.5194	3360	33.5637	1841	34.2837	1941	33.5193	1877	31.0351	3556	32.2245	3081	31.3931	2912	0.626857	0.156502	normal	0.170406	0.206576	normal	0.719999	0.122901	normal	0.887013	0.0410157	normal	0.973062	0.0282104	normal	0.737285	0.0776375	normal	--	--	Cellular Component: ESCRT I complex (GO:0000813);; Biological Process: regulation of cell growth (GO:0001558);; Molecular Function: transcription corepressor activity (GO:0003714);; Cellular Component: nucleolus (GO:0005730);; Cellular Component: early endosome (GO:0005769);; Cellular Component: late endosome (GO:0005770);; Cellular Component: plasma membrane (GO:0005886);; Biological Process: ce…	K12183|0|oas:101118061|K12183 ESCRT-I complex subunit TSG101 | (RefSeq) TSG101; tumor susceptibility 101	Endocytosis (ko04144)	[OU]
gene16934	C13H20orf141	0	0	0	0	0	0	0.325857	18	0.036123	2	0	0	0	0	0	0	0.056809	2	0.019414	2	0.080861	5	0	0	0.711797	0.156069	normal	0.740203	0.126452	normal	0.889302	0.0641429	normal	0.685094	-0.340972	normal	0.895075	0.10816	normal	0.910497	-0.061127	normal	--	--	--	--	--	--
gene1348	RUSC1-AS1	0.111759	6	0.532901	32	0.65727	48	0.501265	29	0.933929	44	0.720506	49	0.631903	22	0.405324	14	0.845753	29	0.898557	63	0.489878	29	0.389768	23	0.789081	0.293275	normal	0.777724	0.266446	normal	0.91327	0.139306	normal	0.862572	-0.178752	normal	0.931189	0.147412	normal	0.970888	0.0388636	normal	--	--	--	--	--	--
gene10414	CXXC4	0.189439	63	0.092471	40	0.211251	98	0.099295	41	0.162267	55	0.151868	73	0.100863	25	0.097577	25	0.143119	35	0.129616	65	0.229951	80	0.083364	34	0.932615	-0.0993815	normal	0.696563	-0.338887	normal	0.941141	-0.114467	normal	0.754379	-0.252068	normal	0.988151	0.0332636	normal	0.850911	-0.169082	normal	--	--	Molecular Function: DNA binding (GO:0003677);; Biological Process: zygotic specification of dorsal/ventral axis (GO:0007352);; Molecular Function: zinc ion binding (GO:0008270);; Cellular Component: cytoplasmic vesicle (GO:0016023);; Molecular Function: PDZ domain binding (GO:0030165);; Biological Process: negative regulation of Wnt signaling pathway (GO:0030178);;	K03344|6.96684e-116|ssc:100521810|K03344 Dvl-binding protein IDAX | (RefSeq) CXXC4; CXXC finger protein 4	Wnt signaling pathway (ko04310)	--
gene16157	TMEM51	6.97549	680	5.66202	709	6.08626	921	5.51917	659	5.46822	537	6.00746	843	8.17919	581	6.41496	471	7.21509	520	7.41191	1069	5.56725	688	7.85139	937	0.839625	-0.104245	normal	0.530116	0.207763	normal	0.889302	0.133558	normal	0.221536	0.315969	normal	0.678872	-0.244116	normal	0.913661	0.0562059	normal	--	--	--	--	--	--
gene8892	LOC101102980	0.025732	5	0.014171	3	0	0	0	0	0.012768	3	0.004352	1	0	0	0	0	0.001993	1	0	0	0	0	0	0	0.916654	-0.0573199	normal	0.75991	-0.151934	normal	0.888866	-0.0810523	normal	0.879184	-0.104947	normal	0.895075	0.0587344	normal	--	--	--	--	--	Molecular Function: G-protein coupled receptor activity (GO:0004930);; Molecular Function: olfactory receptor activity (GO:0004984);; Cellular Component: plasma membrane (GO:0005886);; Cellular Component: integral component of membrane (GO:0016021);;	K04257|0|oas:101102980|K04257 olfactory receptor | (RefSeq) olfactory receptor 1I1-like	Olfactory transduction (ko04740)	--
gene24229	RAB3IL1	7.37883	845	3.98153	526	8.81953	1484	5.12297	608	4.9282	585	6.43566	943	10.9892	844	8.48499	683	7.7907	611	5.1254	852	5.79952	851	7.2658	954	0.776321	-0.254725	normal	0.570701	0.334794	normal	0.949709	-0.0908395	normal	0.00600359	0.683734	normal	0.857135	-0.186575	normal	0.124442	0.471723	normal	--	--	Biological Process: protein transport (GO:0015031);; Molecular Function: Rab guanyl-nucleotide exchange factor activity (GO:0017112);;	K16779|0|chx:102179169|K16779 Rab-3A-interacting protein | (RefSeq) RAB3IL1; RAB3A interacting protein like 1	--	[U]
gene9073	LOC101112395	0	0	0	0	0	0	0	0	0	0	0	0	0	0	0	0	0	0	0.016374	3	0	0	0	0	--	--	--	--	--	--	0.889302	0.0446199	normal	--	--	--	0.895075	-0.0529845	normal	0.765285	-0.104273	normal	--	--	Molecular Function: G-protein coupled receptor activity (GO:0004930);; Molecular Function: olfactory receptor activity (GO:0004984);; Cellular Component: plasma membrane (GO:0005886);; Cellular Component: integral component of membrane (GO:0016021);;	K04257|0|oas:101112395|K04257 olfactory receptor | (RefSeq) olfactory receptor 18-like	Olfactory transduction (ko04740)	--
gene17554	SLC38A8	0.263819	55	0.325207	75	0.460943	129	0.24718	71	0.384943	69	0.452654	126	0.273469	49	0.38382	51	0.208565	39	0.353219	99	0.291147	91	0.148537	45	0.921849	0.103288	normal	0.944148	-0.0610969	normal	0.945951	-0.105692	normal	0.782024	-0.197267	normal	0.895075	0.205884	normal	0.933511	0.0765666	normal	--	--	Cellular Component: integral component of membrane (GO:0016021);;	K14994|0|oas:101123487|K14994 solute carrier family 38 (sodium-coupled neutral amino acid transporter), member 7/8 | (RefSeq) SLC38A8; solute carrier family 38 member 8	--	[E]
gene27805	LOC101109338	0	0	0	0	0	0	0	0	0	0	0	0	0	0	0	0	0	0	0	0	0	0	0	0	--	--	--	--	--	--	--	--	--	--	--	--	--	--	--	--	--	--	[T]	Signal transduction mechanisms	Biological Process: sodium ion transport (GO:0006814);; Biological Process: regulation of pH (GO:0006885);; Biological Process: protein localization (GO:0008104);; Molecular Function: sodium:proton antiporter activity (GO:0015385);; Cellular Component: integral component of membrane (GO:0016021);; Biological Process: transmembrane transport (GO:0055085);;	K14722|0|oas:101109338|K14722 solute carrier family 9 (sodium/hydrogen exchanger), member 2 | (RefSeq) sodium/hydrogen exchanger 2-like	--	[P]
gene10930	WDFY3	16.9829	6896	17.5927	8787	14.3799	8557	14.9393	7382	17.8755	7340	10.1612	5851	15.8211	4590	16.8805	5166	14.6851	4437	16.3967	9735	15.0935	7928	13.0319	6843	0.884957	-0.10793	normal	0.980762	-0.00953394	normal	0.927869	-0.0630722	normal	0.810346	0.106265	normal	0.969288	-0.0557074	normal	0.846871	0.0529607	normal	[R]	General function prediction only	--	--	--	[TU]
gene20945	GPN3	9.04037	734	20.6433	1829	9.87842	1268	17.152	1215	16.3049	1568	15.0035	1212	12.4163	767	18.5287	1327	19.3442	1361	16.3326	2326	16.3852	1947	16.0566	1900	0.846576	0.159128	normal	0.214116	0.560062	normal	0.200152	0.514557	normal	0.37936	0.404348	normal	0.423641	-0.383476	normal	0.991979	-0.00513948	normal	[R]	General function prediction only	Molecular Function: GTP binding (GO:0005525);;	K06883|3.89825e-115|oas:101104273|K06883 uncharacterized protein | (RefSeq) GPN3; GPN-loop GTPase 3	--	[K]
gene9534	LOC101110674	0	0	0	0	0	0	0	0	0	0	0	0	0	0	0	0	0	0	0	0	0	0	0	0	--	--	--	--	--	--	--	--	--	--	--	--	--	--	--	--	--	--	--	--	Molecular Function: G-protein coupled receptor activity (GO:0004930);; Molecular Function: olfactory receptor activity (GO:0004984);; Cellular Component: plasma membrane (GO:0005886);; Cellular Component: integral component of membrane (GO:0016021);;	K04257|0|oas:101110674|K04257 olfactory receptor | (RefSeq) olfactory receptor 2M3-like	Olfactory transduction (ko04740)	--
gene20128	C16H5orf58	0.122113	17	0.057131	10	0.041091	9	0.106294	18	0.083306	12	0.020301	4	0.489996	47	0.051557	6	0.241445	24	0.050812	11	0.091171	16	0.151103	25	0.996856	-0.00455881	normal	0.243577	0.802004	normal	0.926195	0.119579	normal	0.251244	0.980651	normal	0.939037	-0.12302	normal	0.414309	0.621321	normal	--	--	--	--	--	--
gene27840	LOC101114497	0.615065	58	0.466675	56	0.515375	74	0.449178	51	0.460339	44	0.241007	33	0.6143	42	0.741173	52	0.349898	24	0.732942	103	0.399972	47	0.584576	67	0.803867	-0.277222	normal	0.940322	0.0730085	normal	0.967225	0.0706404	normal	0.640035	0.422152	normal	0.815651	-0.327377	normal	0.987683	-0.0147	normal	--	--	Molecular Function: phospholipid binding (GO:0005543);; Biological Process: macrophage differentiation (GO:0030225);;	--	--	--
Ovis_aries_newGene_63735	--	1.30771	191	0.397504	74	0.797903	180	0.366187	65	0.124178	19	1.69397	347	2.37981	244	1.84249	191	0.082712	9	0.075973	17	0.276219	51	0.079508	15	0.956612	-0.0651471	normal	0.739708	0.345186	normal	0.0139967	-0.91631	normal	0.669763	0.491052	normal	0.227864	0.613075	normal	0.0194715	1.29876	up	--	--	--	--	--	--
Ovis_aries_newGene_24340	--	0.244998	43	0.57788	100	0.633534	164	0.463383	56	1.43928	148	1.4892	185	0.66154	50	1.00664	102	1.09803	110	0.944467	165	0.373905	67	0.90795	101	0.812927	0.278496	normal	0.517716	0.472661	normal	0.974276	0.0608959	normal	0.927987	0.0984332	normal	0.895075	0.219356	normal	0.603689	0.394274	normal	--	--	--	--	--	--
gene3081	LOC101112381	0	0	0	0	0	0	0	0	0	0	0	0	0	0	0	0	0	0	0	0	0	0	0.013577	5	--	--	--	--	--	--	0.889302	0.0494981	normal	--	--	--	0.895075	-0.0590502	normal	0.748521	-0.121416	normal	--	--	--	--	--	--
Ovis_aries_newGene_40922	--	0.531301	46	0	0	0.444184	60	0.799946	83	0.628402	55	1.19818	148	0	0	1.41647	87	0	0	0.34223	45	0	0	0.566874	59	0.670899	0.318116	normal	0.96419	0.0232566	normal	0.99447	-0.00925407	normal	0.86517	-0.15808	normal	0.716724	0.326341	normal	0.955105	0.0267418	normal	--	--	Molecular Function: RNA-directed DNA polymerase activity (GO:0003964);; Molecular Function: receptor binding (GO:0005102);; Cellular Component: peroxisome (GO:0005777);; Biological Process: RNA-dependent DNA biosynthetic process (GO:0006278);; Biological Process: putrescine biosynthetic process (GO:0009446);; Biological Process: putrescine catabolic process (GO:0009447);; Cellular Component: memb…	K12347|3.45177e-14|oas:101116391|K12347 natural resistance-associated macrophage protein | (RefSeq) natural resistance-associated macrophage protein 2-like	Lysosome (ko04142);; Mineral absorption (ko04978)	--
gene26178	ZNHIT1	43.3313	1663	38.4056	1876	40.9384	2420	37.6267	1755	35.9198	1387	39.568	2188	46.9771	1294	40.0127	1138	45.2853	1274	32.8108	1888	43.9007	2108	43.5377	2028	0.839625	-0.0819253	normal	0.742782	0.0912196	normal	0.983694	-0.0243707	normal	0.49482	0.171453	normal	0.955829	-0.0606518	normal	0.767099	0.110504	normal	--	--	Biological Process: negative regulation of transcription from RNA polymerase II promoter (GO:0000122);; Molecular Function: chromatin binding (GO:0003682);; Cellular Component: nucleus (GO:0005634);; Biological Process: regulation of histone deacetylation (GO:0031063);; Biological Process: regulation of T cell proliferation (GO:0042129);; Molecular Function: histone deacetylase binding (GO:004282…	K11663|4.12298e-84|tup:102476511|K11663 zinc finger HIT domain-containing protein 1 | (RefSeq) ZNHIT1; zinc finger HIT-type containing 1	--	[R]
gene13127	TG	0.001806	1	0.017627	10	0.010722	7	0.017585	10	0.004732	3	0.016264	10	0.031751	10	0.023951	8	0.030602	10	0.009151	6	0.005552	3	0.011761	7	0.921111	0.0926571	normal	0.44769	0.59354	normal	0.987575	-0.0238028	normal	0.589161	0.578436	normal	0.918217	0.135196	normal	0.301624	0.726089	normal	[I]	Lipid transport and metabolism	Molecular Function: carboxylic ester hydrolase activity (GO:0004091);; Molecular Function: receptor activity (GO:0004872);; Molecular Function: hormone activity (GO:0005179);; Cellular Component: extracellular space (GO:0005615);; Cellular Component: integral component of plasma membrane (GO:0005887);; Biological Process: thyroid hormone generation (GO:0006590);; Biological Process: synapse assem…	K10809|0|oas:101122868|K10809 thyroglobulin | (RefSeq) TG; thyroglobulin	Thyroid hormone synthesis (ko04918);; Autoimmune thyroid disease (ko05320)	--
gene21815	PPP4R3A	24.9138	5532	27.3156	7925	24.9896	8751	21.607	6265	23.4453	5315	22.6661	7884	25.5736	4480	25.4895	4559	24.5079	4582	25.9108	8559	24.526	7076	25.4761	7124	0.791086	-0.0997279	normal	0.729109	0.0802631	normal	0.981894	-0.0156033	normal	0.228962	0.177898	normal	0.864403	-0.091101	normal	0.629995	0.0920443	normal	--	--	Cellular Component: nucleus (GO:0005634);; Cellular Component: cytoplasm (GO:0005737);; Biological Process: protein dephosphorylation (GO:0006470);; Cellular Component: protein phosphatase 4 complex (GO:0030289);; Biological Process: positive regulation of gluconeogenesis (GO:0045722);;	K17491|0|bom:102284492|K17491 protein phosphatase 4 regulatory subunit 3 | (RefSeq) PPP4R3A, SMEK1; protein phosphatase 4 regulatory subunit 3A	Glucagon signaling pathway (ko04922)	[G]
gene6914	SYCP3	0.059848	6	0	0	0.027107	5	0.01718	3	0.020411	2	0	0	0.079956	6	0.885595	51	0.996032	67	0.03772	6	0.065052	8	0.499637	57	0.907883	-0.0675167	normal	0.0239069	1.24522	up	0.607984	0.276289	normal	0.000796356	2.25028	up	0.376772	-0.417669	normal	0.499492	0.527472	normal	--	--	Molecular Function: DNA binding (GO:0003677);; Cellular Component: nucleus (GO:0005634);; Cellular Component: chromosome (GO:0005694);; Biological Process: meiotic cell cycle (GO:0007126);; Biological Process: spermatogenesis, exchange of chromosomal proteins (GO:0035093);; Biological Process: cell division (GO:0051301);;	K19528|2.85712e-168|oas:101108560|K19528 synaptonemal complex protein 3 | (RefSeq) SYCP3; synaptonemal complex protein 3	Homologous recombination (ko03440)	--
gene10726	LOC101111099	5.31541	1783	1.53605	659	5.57064	2902	6.04862	2487	7.83306	2644	4.29814	2077	1.14474	280	4.95312	1238	4.68155	1152	6.17957	3153	6.02354	2529	4.82147	1965	0.643482	0.375254	normal	0.916563	-0.116172	normal	0.84085	0.283593	normal	0.265952	-0.679108	normal	0.940639	0.0941045	normal	0.413856	-0.522088	normal	--	--	--	K09222|0|oas:101111099|K09222 RE1-silencing transcription factor | (RefSeq) RE1-silencing transcription factor-like	Signaling pathways regulating pluripotency of stem cells (ko04550);; Huntington's disease (ko05016)	[R]
gene5890	LOC101119456	2.77412	242	2.63949	293	3.28833	441	4.73249	501	3.00593	264	3.74506	470	3.06761	192	3.05042	197	3.71189	237	3.04539	398	3.3001	360	5.33527	564	0.460903	0.366901	normal	0.740746	0.149767	normal	0.654898	0.329755	normal	0.599509	-0.266932	normal	0.999228	0.00213178	normal	0.702024	-0.242151	normal	--	--	Cellular Component: nucleus (GO:0005634);; Biological Process: nucleosome assembly (GO:0006334);;	K11290|1.91489e-175|oas:101119456|K11290 template-activating factor I | (RefSeq) protein SET	--	[L]
gene25915	SLC5A11	0.736418	287	0.181947	89	0.302885	145	0.164181	44	0.821721	306	0.571564	95	0.947474	232	0.86314	249	1.27432	339	0.190956	106	1.13881	492	0.164334	79	0.964341	-0.055475	normal	0.0885095	0.940045	normal	0.963681	0.0735366	normal	0.11541	1.08203	normal	0.943019	-0.121213	normal	0.34465	0.665747	normal	[R]	General function prediction only	Biological Process: sodium ion transport (GO:0006814);; Biological Process: apoptotic process (GO:0006915);; Biological Process: carbohydrate transport (GO:0008643);; Molecular Function: symporter activity (GO:0015293);; Cellular Component: integral component of membrane (GO:0016021);; Biological Process: transmembrane transport (GO:0055085);;	K14391|0|oas:101107154|K14391 solute carrier family 5 (sodium/myo-inositol cotransporter), member 11 | (RefSeq) SLC5A11; solute carrier family 5 member 11	--	[P]
Ovis_aries_newGene_50070	--	72.968	1413	81.1661	2001	71.5688	2135	88.5048	2083	83.3071	1622	94.1554	2627	48.7024	677	46.4251	666	58.9698	837	84.7904	2462	70.7516	1714	83.7074	1968	0.288484	0.25542	normal	0.00353196	-0.548907	normal	0.894158	0.0799691	normal	9.39934e-06	-0.821099	normal	0.777225	0.165795	normal	0.00167817	-0.631318	normal	--	--	Molecular Function: RNA polymerase II regulatory region sequence-specific DNA binding (GO:0000977);; Cellular Component: stress fiber (GO:0001725);; Molecular Function: nucleoside binding (GO:0001882);; Molecular Function: calcium ion binding (GO:0005509);; Cellular Component: extracellular space (GO:0005615);; Cellular Component: nucleus (GO:0005634);; Cellular Component: brush border (GO:000590…	K05699|2.62333e-50|cfa:484526|K05699 actinin alpha 1/4 | (RefSeq) ACTN4; actinin alpha 4	Focal adhesion (ko04510);; Adherens junction (ko04520);; Tight junction (ko04530);; Leukocyte transendothelial migration (ko04670);; Regulation of actin cytoskeleton (ko04810);; Amoebiasis (ko05146);; Viral carcinogenesis (ko05203);; Systemic lupus erythematosus (ko05322);; Arrhythmogenic right ventricular cardiomyopathy (ARVC) (ko05412)	[Z]
gene800	PLPPR5	0.259323	21	0.436741	17	0.198139	27	0.106054	12	0.135075	12	0.080255	10	0.065607	5	0.093799	6	0.064366	5	0.030879	4	0.122067	14	0.164862	17	0.703193	-0.355021	normal	0.346445	-0.690422	normal	0.853544	-0.255361	normal	0.831361	-0.251304	normal	0.994414	0.0167565	normal	0.890497	-0.142881	normal	--	--	--	K19581|0|chx:102180096|K19581 lipid phosphate phosphatase-related protein type 1/2/5 | (RefSeq) PLPPR5; phospholipid phosphatase related 5	--	[I]
gene13367	LOC101118537	1.64958	117	0.556024	50	0.487181	53	0.302604	26	0.411705	30	0.249712	26	0.25416	13	0.81723	43	0.53005	28	0.083031	9	0.269567	24	0.172089	15	0.221363	-0.660244	normal	0.631302	-0.437951	normal	0.0525265	-0.773464	normal	0.596577	0.506888	normal	0.75743	0.363513	normal	0.186013	0.861929	normal	--	--	Molecular Function: calcium ion binding (GO:0005509);; Molecular Function: calcium-dependent phospholipid binding (GO:0005544);; Cellular Component: intracellular (GO:0005622);; Biological Process: blood coagulation (GO:0007596);; Cellular Component: external side of plasma membrane (GO:0009897);; Biological Process: response to organic substance (GO:0010033);; Biological Process: negative regula…	K16646|6.30036e-69|oas:101118537|K16646 annexin A5 | (RefSeq) annexin A5-like	--	[U]
gene5896	CDC42EP3	24.6151	2802	26.0977	3795	24.4857	4320	30.9934	4301	33.9392	3920	29.2479	4823	18.254	1501	16.9927	1444	19.6623	1655	24.38	4192	23.9597	3444	25.6177	3537	0.0214334	0.345284	normal	0.000656673	-0.455474	normal	0.975961	-0.0196082	normal	4.44826e-09	-0.813605	normal	0.0202537	0.35733	normal	0.00217735	-0.438967	normal	--	--	Cellular Component: actin cytoskeleton (GO:0015629);;	--	--	--
gene20423	BRIX1	16.7395	1091	15.6193	1296	16.3653	1643	14.4851	1147	20.3263	1333	17.8181	1673	20.0715	939	20.3224	982	20.1422	962	16.2835	1592	18.4745	1507	16.614	1315	0.834894	0.127063	normal	0.0495012	0.29378	normal	0.889302	0.0742228	normal	0.611248	0.155524	normal	0.965086	0.0473964	normal	0.282278	0.212267	normal	--	--	Cellular Component: nucleolus (GO:0005730);; Biological Process: ribosome biogenesis (GO:0042254);;	K14820|0|oas:101112163|K14820 ribosome biogenesis protein BRX1 | (RefSeq) BRIX1; BRX1, biogenesis of ribosomes	--	[J]
gene26774	LOC105605095	0	0	0	0	0	0	0	0	0	0	0	0	0	0	0	0	0	0	0	0	0	0	0	0	--	--	--	--	--	--	--	--	--	--	--	--	--	--	--	--	--	--	--	--	--	--	--	--
gene18247	BCKDHA	43.2762	2902	45.5254	3886	41.4243	4279	49.3437	4021	38.0103	2564	50.1562	4847	51.3096	2470	48.3725	2404	52.7574	2593	49.249	4953	57.9474	4863	56.217	4577	0.840366	0.104347	normal	0.175204	0.208999	normal	0.10339	0.313476	normal	0.790485	0.0917396	normal	0.758329	-0.204868	normal	0.666588	-0.119039	normal	[C]	Energy production and conversion	Molecular Function: 3-methyl-2-oxobutanoate dehydrogenase (2-methylpropanoyl-transferring) activity (GO:0003863);; Cellular Component: mitochondrial matrix (GO:0005759);; Biological Process: metabolic process (GO:0008152);; Molecular Function: metal ion binding (GO:0046872);;	K00166|0|oas:100145857|K00166 2-oxoisovalerate dehydrogenase E1 component alpha subunit [EC:1.2.4.4] | (RefSeq) BCKDHA; branched chain keto acid dehydrogenase E1, alpha polypeptide	Valine, leucine and isoleucine degradation (ko00280);; Propanoate metabolism (ko00640)	[C]
Ovis_aries_newGene_56424	--	0	0	0.44788	35	0	0	0	0	0.867535	53	0.363776	32	0	0	0	0	0	0	0	0	0	0	0	0	0.928893	0.0340091	normal	0.701594	-0.181062	normal	0.881249	-0.0862748	normal	0.170573	-0.983927	normal	0.464135	0.318756	normal	--	--	--	[R]	General function prediction only	Molecular Function: GTPase activity (GO:0003924);; Molecular Function: GTP binding (GO:0005525);; Cellular Component: endoplasmic reticulum membrane (GO:0005789);; Cellular Component: trans-Golgi network (GO:0005802);; Cellular Component: focal adhesion (GO:0005925);; Biological Process: small GTPase mediated signal transduction (GO:0007264);; Cellular Component: cytoplasmic side of plasma membra…	K07890|9.97732e-98|oas:100302077|K07890 Ras-related protein Rab-21 | (RefSeq) RAB21; RAB21, member RAS oncogene family	--	[R]
gene6326	CALCOCO1	30.2334	5451	36.1721	8291	34.6348	9665	40.6745	9053	38.654	6981	42.9252	11063	36.3761	4835	34.5414	4767	34.8795	4564	38.84	10569	31.9455	7316	38.697	8514	0.167837	0.292451	normal	0.776167	0.072294	normal	0.88696	0.11964	normal	0.178896	-0.234664	normal	0.758329	0.162841	normal	0.847889	-0.0573718	normal	--	--	Cellular Component: nuclear chromatin (GO:0000790);; Molecular Function: chromatin binding (GO:0003682);; Cellular Component: cytoplasm (GO:0005737);; Molecular Function: beta-catenin binding (GO:0008013);; Molecular Function: protein C-terminus binding (GO:0008022);; Biological Process: Wnt signaling pathway (GO:0016055);; Molecular Function: ligand-dependent nuclear receptor transcription coact…	--	--	--
gene16606	MLLT10	6.87829	2303	7.89134	3317	7.7823	3845	8.29453	3150	7.87008	2642	7.19727	3464	9.96261	2149	10.1396	2090	9.9054	2026	8.2713	4073	8.12733	3409	8.83332	3260	0.853914	0.0687215	normal	0.267126	0.193699	normal	0.71056	0.13031	normal	0.596057	0.119655	normal	0.895075	-0.0685044	normal	0.783629	0.0569941	normal	--	--	Molecular Function: zinc ion binding (GO:0008270);;	--	--	[R]
Ovis_aries_newGene_6819	--	9.72701	128	8.82117	148	9.80589	199	11.8156	189	9.08507	120	10.5584	200	10.2031	97	9.20725	90	6.25819	61	10.9358	216	9.42333	155	11.7025	187	0.839625	0.154368	normal	0.836982	-0.133496	normal	0.889302	0.149352	normal	0.618228	-0.309655	normal	0.999368	-0.00137092	normal	0.632245	-0.292224	normal	--	--	Molecular Function: protein tyrosine phosphatase activity (GO:0004725);; Cellular Component: nucleoplasm (GO:0005654);; Cellular Component: early endosome (GO:0005769);; Biological Process: negative regulation of epithelial cell migration (GO:0010633);; Molecular Function: protein kinase binding (GO:0019901);; Biological Process: peptidyl-tyrosine dephosphorylation (GO:0035335);; Cellular Compone…	K18040|4.18671e-33|chx:102182549|K18040 tyrosine-protein phosphatase non-receptor type 23 [EC:3.1.3.48] | (RefSeq) PTPN23; protein tyrosine phosphatase, non-receptor type 23	--	[R]
Ovis_aries_newGene_14771	--	1.77182	418	1.12392	181	1.85295	617	3.09411	741	3.49343	1168	1.38005	461	0.883634	122	0.529794	124	1.06884	95	3.1506	1067	1.17398	298	2.19394	532	0.215872	0.657102	normal	0.0983559	-0.835406	normal	0.849231	0.284076	normal	9.20288e-06	-1.91212	down	0.78094	0.349986	normal	0.00218901	-1.28095	down	--	--	Molecular Function: RNA-directed DNA polymerase activity (GO:0003964);; Cellular Component: proteinaceous extracellular matrix (GO:0005578);; Cellular Component: plasma membrane (GO:0005886);; Biological Process: RNA-dependent DNA biosynthetic process (GO:0006278);; Biological Process: polyamine biosynthetic process (GO:0006596);; Biological Process: polyamine catabolic process (GO:0006598);; Bio…	K14740|1.12551e-14|bom:106701043|K14740 metallothionein 3 | (RefSeq) MT3; metallothionein 3	--	--
gene13712	KIAA0226L	1.66731	212	1.03326	174	1.01719	201	0.962995	152	1.08898	143	1.00909	187	1.96018	180	1.49782	140	2.27973	211	1.24574	240	1.33381	212	0.982611	156	0.839625	-0.192345	normal	0.25587	0.516988	normal	0.978548	-0.0457215	normal	0.0184884	0.779255	normal	0.895075	-0.159787	normal	0.101801	0.586485	normal	--	--	--	--	--	[T]
Ovis_aries_newGene_50621	--	0.067951	3	0.136807	6	0.216414	10	0	0	0.270194	9	0	0	0.189295	5	0	0	0.214379	5	0.026565	2	0.024068	1	0.279804	11	0.932615	-0.0560338	normal	0.986545	-0.018598	normal	0.971058	-0.0456225	normal	0.926334	0.0915957	normal	0.983574	-0.0223025	normal	0.956866	0.0462434	normal	--	--	--	--	--	--
Ovis_aries_newGene_62479	--	0.236565	6	0	0	0.092899	4	0	0	0.268429	7	0.382464	13	0.163696	3	0.368968	7	0.284704	5	0.088296	4	0.05834	2	0	0	0.906863	0.0745339	normal	0.73921	0.296523	normal	0.939227	-0.0536643	normal	0.933456	0.113544	normal	0.895075	0.136028	normal	0.459288	0.500323	normal	--	--	Biological Process: obsolete protein import into nucleus, docking (GO:0000059);; Biological Process: protein import into nucleus, translocation (GO:0000060);; Cellular Component: nucleoplasm (GO:0005654);; Cellular Component: Golgi apparatus (GO:0005794);; Cellular Component: fascia adherens (GO:0005916);; Biological Process: regulation of transcription, DNA-templated (GO:0006355);; Biological Pr…	K09228|3.27341e-20|oas:100527962|K09228 KRAB domain-containing zinc finger protein | (RefSeq) ZNF33B; zinc finger protein 33B	--	--
gene5089	LAMC3	32.0245	7680	26.0096	7997	29.9378	11242	21.4298	7704	27.1918	7625	31.0991	12604	35.0453	5692	23.9588	4062	37.1724	6599	33.1248	11672	20.7326	7296	27.3183	8212	0.839625	0.111405	normal	0.912702	0.0557414	normal	0.948601	-0.0561023	normal	0.899825	-0.0619711	normal	0.866832	0.159653	normal	0.813979	0.108286	normal	--	--	--	K06247|0|oas:101122429|K06247 laminin, gamma 3 | (RefSeq) LAMC3; laminin subunit gamma 3	PI3K-Akt signaling pathway (ko04151);; Focal adhesion (ko04510);; ECM-receptor interaction (ko04512);; Toxoplasmosis (ko05145);; Amoebiasis (ko05146);; Pathways in cancer (ko05200);; Small cell lung cancer (ko05222)	[W]
gene24990	LHPP	10.1406	751	9.85028	928	9.99977	1140	11.7001	1053	11.2771	840	12.2327	1305	7.77281	413	6.70497	368	7.27028	395	10.9024	1243	10.0674	933	10.9923	988	0.2646	0.252122	normal	0.00651699	-0.466437	normal	0.889302	0.101904	normal	4.8134e-05	-0.731476	normal	0.819237	0.142276	normal	0.00130578	-0.571999	normal	[F]	Nucleotide transport and metabolism	Molecular Function: magnesium ion binding (GO:0000287);; Molecular Function: inorganic diphosphatase activity (GO:0004427);; Cellular Component: nucleus (GO:0005634);; Cellular Component: cytosol (GO:0005829);; Biological Process: protein dephosphorylation (GO:0006470);; Molecular Function: phosphohistidine phosphatase activity (GO:0008969);; Molecular Function: protein homodimerization activity …	K11725|1.18016e-141|oas:101104360|K11725 phospholysine phosphohistidine inorganic pyrophosphate phosphatase [EC:3.6.1.1 3.1.3.-] | (RefSeq) LHPP; phospholysine phosphohistidine inorganic pyrophosphate phosphatase	Oxidative phosphorylation (ko00190)	[R]
gene25339	LOC101109580	0.006917	1	0.040156	2	0.015633	1	0.078402	3	0.039956	2	0.027676	2	0.061264	2	0	0	0.024148	1	0.034461	2	0.088105	4	0.041886	2	0.894836	0.092802	normal	0.955684	0.0436475	normal	0.916107	0.0838662	normal	0.915667	-0.119065	normal	0.998181	-0.00690951	normal	0.910051	-0.0894398	normal	[J]	Translation, ribosomal structure and biogenesis	Molecular Function: structural constituent of ribosome (GO:0003735);; Cellular Component: ribosome (GO:0005840);; Biological Process: translation (GO:0006412);;	K02957|2.05343e-114|oas:101109580|K02957 small subunit ribosomal protein S15Ae | (RefSeq) 40S ribosomal protein S15a-like	Ribosome (ko03010)	[J]
gene23778	FAT3	0.039204	38	0.052713	64	0.04863	72	0.01719	20	0.014709	15	0.027832	39	0.020308	14	0.019976	15	0.028347	20	0.03804	55	0.010932	14	0.005141	6	0.180144	-0.68697	normal	0.170406	-0.775023	normal	0.533375	-0.429882	normal	0.934991	0.102796	normal	0.978853	0.0528797	normal	0.885544	0.152647	normal	[U]	Intracellular trafficking, secretion, and vesicular transport	Molecular Function: calcium ion binding (GO:0005509);; Cellular Component: plasma membrane (GO:0005886);; Biological Process: homophilic cell adhesion via plasma membrane adhesion molecules (GO:0007156);; Cellular Component: integral component of membrane (GO:0016021);;	K16506|0|oas:101107744|K16506 protocadherin Fat 1/2/3 | (RefSeq) FAT3; FAT atypical cadherin 3	--	[T]
gene13688	LACC1	6.18357	1835	5.64123	2108	6.57562	3026	3.69012	1232	5.33962	1557	4.12413	1718	7.17828	1534	8.78692	1701	4.80699	865	4.15434	1797	4.75972	1592	3.5917	1213	0.0628995	-0.473135	normal	0.969373	0.0252924	normal	0.000637784	-0.605214	normal	0.197856	0.507402	normal	0.895549	0.116618	normal	0.0850702	0.612142	normal	[P]	Inorganic ion transport and metabolism	--	K05810|0|oas:101109625|K05810 laccase domain-containing protein | (RefSeq) LACC1; laccase domain containing 1	--	--
gene23197	TUBB	157.46	20132	162.072	26382	149.477	29443	173.04	26890	172.896	22237	161.233	29710	125.309	11502	106.502	10091	118.53	11108	182.578	35012	186.062	29775	180.944	28091	0.588872	0.139023	normal	0.000862388	-0.430171	normal	0.0854338	0.224815	normal	2.2268e-05	-0.577447	normal	0.864403	-0.0916494	normal	7.48239e-09	-0.660916	normal	--	--	Molecular Function: GTPase activity (GO:0003924);; Molecular Function: structural constituent of cytoskeleton (GO:0005200);; Molecular Function: GTP binding (GO:0005525);; Cellular Component: nuclear envelope lumen (GO:0005641);; Cellular Component: cytoplasm (GO:0005737);; Cellular Component: microtubule (GO:0005874);; Cellular Component: plasma membrane (GO:0005886);; Biological Process: obsole…	K07375|0|xma:102222694|K07375 tubulin beta | (RefSeq) uncharacterized LOC102222694	Phagosome (ko04145);; Gap junction (ko04540)	[Z]
gene11653	LOC105608915	0	0	0	0	0.021223	2	0	0	0	0	0	0	0	0	0	0	0	0	0	0	0.026476	3	0.013555	2	0.842559	-0.0509136	normal	0.780897	-0.0960612	normal	0.936485	0.0383234	normal	--	--	--	0.895075	-0.0598812	normal	0.748521	-0.120816	normal	--	--	--	--	--	--
gene712	SH3GLB1	21.5815	6712	21.0464	8328	21.5473	10326	16.7985	6351	19.0767	5972	15.8553	7112	21.8459	4879	23.7449	5476	22.9194	5229	19.0869	8901	20.847	8118	19.2943	7291	0.109846	-0.273177	normal	0.709359	0.0797255	normal	0.764621	-0.110674	normal	0.0185036	0.354355	normal	0.619712	-0.168706	normal	0.255071	0.18764	normal	--	--	Cellular Component: cytoplasm (GO:0005737);;	K11248|0|lve:103090328|K11248 endophilin-B1 | (RefSeq) SH3GLB1; SH3 domain containing GRB2 like endophilin B1	Endocytosis (ko04144)	[T]
gene8941	LOC101114269	0	0	0	0	0	0	0	0	0	0	0	0	0	0	0	0	0	0	0	0	0	0	0	0	--	--	--	--	--	--	--	--	--	--	--	--	--	--	--	--	--	--	--	--	Molecular Function: G-protein coupled receptor activity (GO:0004930);; Molecular Function: olfactory receptor activity (GO:0004984);; Cellular Component: plasma membrane (GO:0005886);; Biological Process: G-protein coupled receptor signaling pathway (GO:0007186);; Cellular Component: integral component of membrane (GO:0016021);; Biological Process: detection of chemical stimulus involved in senso…	K04257|0|oas:101114269|K04257 olfactory receptor | (RefSeq) olfactory receptor 7A10-like	Olfactory transduction (ko04740)	--
Ovis_aries_newGene_11425	--	0.40111	53	0.844032	142	0.52615	107	0.6915	111	0.564314	75	0.392349	75	0.214225	21	1.0534	103	0.331281	33	0.620468	123	0.844282	140	0.251993	41	0.968861	-0.0466079	normal	0.938201	-0.0874113	normal	0.99244	-0.0202618	normal	0.962601	-0.0588471	normal	0.994087	-0.0199118	normal	0.957795	-0.0578843	normal	[X]	--	Cellular Component: membrane (GO:0016020);;	--	--	[R]
Ovis_aries_newGene_55833	--	20.7014	371	20.2938	463	22.2822	614	16.3127	355	24.731	446	17.5674	453	19.617	252	23.3205	309	19.7854	259	22.7856	612	20.8543	469	22.4008	487	0.914522	-0.0792709	normal	0.951361	-0.028488	normal	0.939061	0.0591385	normal	0.925864	0.0528126	normal	0.895075	-0.141668	normal	0.80684	-0.0938788	normal	--	--	--	--	--	--
gene18338	TOMM40	20.5536	1632	18.0098	1830	18.0993	2216	21.3473	2063	20.6328	1655	20.5471	2360	13.0622	746	14.3363	832	14.0682	834	19.7777	2402	20.5322	2041	20.4548	1980	0.60019	0.167635	normal	0.00514706	-0.454011	normal	0.875149	0.106757	normal	2.07788e-05	-0.635489	normal	0.925799	0.054954	normal	2.18561e-05	-0.569093	normal	--	--	Cellular Component: mitochondrial outer membrane translocase complex (GO:0005742);; Biological Process: protein targeting to mitochondrion (GO:0006626);; Cellular Component: integral component of mitochondrial membrane (GO:0032592);; Biological Process: transmembrane transport (GO:0055085);;	K11518|0|oas:101111570|K11518 mitochondrial import receptor subunit TOM40 | (RefSeq) TOMM40; translocase of outer mitochondrial membrane 40	Amyotrophic lateral sclerosis (ALS) (ko05014)	[U]
gene12812	IYD	0	0	0	0	0.005665	2	0	0	0	0	0.02766	5	0	0	0	0	0	0	0	0	0	0	0	0	0.935329	0.0290305	normal	0.780897	-0.0960612	normal	0.889302	-0.0412432	normal	0.705251	-0.21032	normal	0.895075	0.0587374	normal	--	--	--	[C]	Energy production and conversion	Molecular Function: iodide peroxidase activity (GO:0004447);; Cellular Component: integral component of membrane (GO:0016021);; Biological Process: oxidation-reduction process (GO:0055114);;	K17231|0|oas:101123564|K17231 iodotyrosine deiodinase [EC:1.21.1.1] | (RefSeq) IYD; iodotyrosine deiodinase	Thyroid hormone synthesis (ko04918)	[C]
gene20800	CTSO	5.54974	1459	5.06057	2437	4.22701	2741	5.47104	1564	3.791	1341	4.95816	2156	4.31784	1089	5.70464	1573	4.16771	1019	3.30716	1774	7.51476	2303	4.09777	1606	0.367401	-0.275438	normal	0.935903	-0.0446496	normal	0.828386	-0.209566	normal	0.536127	0.232943	normal	0.970514	-0.0506156	normal	0.740997	0.177195	normal	[O]	Posttranslational modification, protein turnover, chaperones	Biological Process: proteolysis (GO:0006508);; Molecular Function: cysteine-type peptidase activity (GO:0008234);;	K01374|0|oas:101112852|K01374 cathepsin O [EC:3.4.22.42] | (RefSeq) CTSO; cathepsin O	Lysosome (ko04142);; Apoptosis (ko04210)	[O]
gene804	AGL	3.6778	1272	4.01689	1806	3.88439	2068	2.85527	1147	3.41218	1225	3.40847	1324	4.1006	1035	5.41609	1354	4.96992	1327	3.44371	1881	3.389	1544	2.62991	1117	0.173494	-0.341276	normal	0.182591	0.308375	normal	0.656388	-0.221668	normal	0.00218027	0.660316	normal	0.895549	-0.115121	normal	0.0290663	0.531568	normal	[G]	Carbohydrate transport and metabolism	Molecular Function: 4-alpha-glucanotransferase activity (GO:0004134);; Molecular Function: amylo-alpha-1,6-glucosidase activity (GO:0004135);; Cellular Component: nucleus (GO:0005634);; Cellular Component: cytoplasm (GO:0005737);; Biological Process: glycogen biosynthetic process (GO:0005978);; Cellular Component: inclusion body (GO:0016234);; Molecular Function: polysaccharide binding (GO:003024…	K01196|0|oas:101111501|K01196 glycogen debranching enzyme [EC:2.4.1.25 3.2.1.33] | (RefSeq) AGL; amylo-alpha-1, 6-glucosidase, 4-alpha-glucanotransferase	Starch and sucrose metabolism (ko00500)	[G]
Ovis_aries_newGene_48511	--	0.189697	16	0.378354	39	0.619141	76	0.049286	5	0.042342	4	0.284907	33	0.284423	17	0	0	0	0	0.030249	4	0.451549	45	0.235407	23	0.461905	-0.456479	normal	0.552733	-0.431941	normal	0.889302	-0.178106	normal	0.927244	-0.110884	normal	0.895075	-0.168388	normal	0.758787	-0.217557	normal	--	--	Biological Process: detection of chemical stimulus involved in sensory perception of bitter taste (GO:0001580);; Molecular Function: G-protein coupled receptor activity (GO:0004930);; Molecular Function: voltage-gated ion channel activity (GO:0005244);; Molecular Function: 1-phosphatidylinositol binding (GO:0005545);; Molecular Function: phosphatidylinositol-3,4,5-trisphosphate binding (GO:000554…	K08474|1.36773e-27|bom:102286375|K08474 taste receptor type 2 | (RefSeq) taste receptor type 2 member 42	Taste transduction (ko04742)	--
gene12486	MICAL1	29.8675	5624	32.8115	7761	30.0449	8792	32.7803	7438	29.7453	5555	30.9649	8283	30.7593	4326	29.4828	4252	31.5407	4389	31.4679	8792	25.967	6171	30.2888	6935	0.951896	0.0275529	normal	0.964128	0.0111198	normal	0.889302	-0.0739902	normal	0.943997	-0.0219354	normal	0.895075	0.0941001	normal	0.752738	0.0822705	normal	--	--	Biological Process: negative regulation of protein phosphorylation (GO:0001933);; Molecular Function: actin binding (GO:0003779);; Cellular Component: cytoplasm (GO:0005737);; Cellular Component: cytoskeleton (GO:0005856);; Molecular Function: zinc ion binding (GO:0008270);; Molecular Function: oxidoreductase activity, acting on paired donors, with incorporation or reduction of molecular oxygen, …	K19947|0|oas:101113940|K19947 protein-methionine sulfoxide oxidase MICAL [EC:1.14.13.-] | (RefSeq) MICAL1; microtubule associated monooxygenase, calponin and LIM domain containing 1	--	[TZ]
Ovis_aries_newGene_25817	--	0.430531	173	0.31369	161	0.509084	315	0.364346	178	0.314171	127	0.411671	238	0.497921	144	0.324313	97	0.328324	97	0.422794	255	0.468928	236	0.518484	253	0.871263	-0.136725	normal	0.867734	-0.119032	normal	0.895398	0.134883	normal	0.97339	0.0258123	normal	0.682939	-0.29369	normal	0.623509	-0.279056	normal	--	--	Molecular Function: nucleic acid binding (GO:0003676);; Molecular Function: actin binding (GO:0003779);; Molecular Function: RNA-directed DNA polymerase activity (GO:0003964);; Cellular Component: mitochondrion (GO:0005739);; Biological Process: RNA-dependent DNA biosynthetic process (GO:0006278);; Biological Process: cell adhesion (GO:0007155);; Biological Process: regulation of heart contractio…	K09228|1.0369e-32|bta:100138479|K09228 KRAB domain-containing zinc finger protein | (RefSeq) zinc finger protein 510	--	--
Ovis_aries_newGene_13688	--	0.086765	5	0.179487	10	0.110104	8	0.635444	38	0.120139	7	0.143242	8	0.087435	3	0.330198	8	0.053968	2	0.403724	23	0.186663	11	0.064216	3	0.676102	0.326343	normal	0.991492	-0.0136998	normal	0.916107	0.119605	normal	0.544851	-0.633652	normal	0.895075	0.165876	normal	0.830878	-0.196057	normal	--	--	Molecular Function: receptor binding (GO:0005102);; Cellular Component: cytoplasm (GO:0005737);; Biological Process: signal transduction (GO:0007165);; Biological Process: nucleoside triphosphate catabolic process (GO:0009143);; Molecular Function: hydrolase activity (GO:0016787);; Biological Process: animal organ development (GO:0048513);; Biological Process: positive regulation of cellular proc…	K15196|4.7612e-11|bta:618161|K15196 transcription factor IIIB 90 kDa subunit | (RefSeq) BRF1; BRF1, RNA polymerase III transcription initiation factor subunit	--	--
Ovis_aries_newGene_5781	--	6.56102	358	7.49251	521	5.84763	492	9.85416	654	9.95631	547	9.43792	742	5.9965	235	6.68212	270	6.49668	260	9.47992	776	8.45223	577	10.2159	677	0.0150401	0.541026	normal	0.888197	-0.0651153	normal	0.0956193	0.450033	normal	0.00144	-0.643811	normal	0.932727	0.0719924	normal	0.0158017	-0.549573	normal	--	--	Molecular Function: tRNA binding (GO:0000049);; Molecular Function: cysteine-tRNA ligase activity (GO:0004817);; Molecular Function: ATP binding (GO:0005524);; Cellular Component: cytosol (GO:0005829);; Biological Process: cysteinyl-tRNA aminoacylation (GO:0006423);; Molecular Function: protein homodimerization activity (GO:0042803);;	K01883|3.85873e-46|chx:102174367|K01883 cysteinyl-tRNA synthetase [EC:6.1.1.16] | (RefSeq) CARS; cysteinyl-tRNA synthetase	Aminoacyl-tRNA biosynthesis (ko00970)	[K]
Ovis_aries_newGene_52730	--	0	0	0	0	0.250554	9	0	0	0	0	0	0	0	0	0	0	0	0	0	0	0	0	0	0	0.839625	-0.0645597	normal	0.740746	-0.132953	normal	0.889302	-0.0513784	normal	--	--	--	--	--	--	--	--	--	--	--	--	--	--	--
gene22254	SSUH2	0.316392	58	0.244762	57	0.421004	118	0.300462	67	0.318165	58	0.372564	97	0.123708	17	0.260722	35	0.454633	61	0.215169	59	0.326311	74	0.305377	64	0.985203	0.0239004	normal	0.870815	-0.160797	normal	0.899348	-0.158075	normal	0.817421	-0.218311	normal	0.895075	0.198006	normal	0.995453	0.00554999	normal	--	--	--	--	--	[O]
gene5973	NOTO	0	0	0.024897	4	0	0	0.004759	1	0.032319	5	0	0	0	0	0.021935	3	0	0	0	0	0.051949	9	0	0	0.947812	0.0302303	normal	0.972561	0.0168044	normal	0.962684	0.0227867	normal	0.95238	-0.0525199	normal	0.988638	-0.0124886	normal	0.938801	-0.0365753	normal	--	--	Molecular Function: transcription regulatory region sequence-specific DNA binding (GO:0000976);; Molecular Function: transcription factor activity, sequence-specific DNA binding (GO:0003700);; Cellular Component: nucleus (GO:0005634);; Biological Process: determination of left/right symmetry (GO:0007368);; Biological Process: embryonic pattern specification (GO:0009880);; Biological Process: dors…	--	--	[K]
gene12437	FAM26E	14.6589	2464	13.0678	2822	13.7194	3538	17.5338	3501	6.53268	1498	14.9208	3529	7.98778	998	12.1311	1461	14.468	1776	14.991	3702	15.6608	3194	16.1215	3143	0.995848	0.0054461	normal	0.511697	-0.267103	normal	0.773813	0.122366	normal	0.628242	-0.277128	normal	0.935074	-0.105766	normal	0.247513	-0.388783	normal	--	--	--	--	--	--
gene13081	LY6K	0.029068	14	0.022409	13	0.008655	6	0.037884	21	0.075746	35	0.078891	52	0.070404	23	0.055385	19	0.060175	20	0.04154	29	0.044441	26	0.031199	18	0.211828	0.655786	normal	0.157026	0.912268	normal	0.752347	0.326692	normal	0.950869	-0.073571	normal	0.779892	0.355517	normal	0.605745	0.425453	normal	--	--	--	--	--	--
Ovis_aries_newGene_59809	--	0.008373	1	0.097635	3	0.128019	5	0.105692	3	0.420468	10	0.015086	1	0.108778	2	0.13823	3	0	0	0.093359	4	0.191456	6	0.003804	1	0.858867	0.121934	normal	0.996913	0.00444863	normal	0.978006	0.0345568	normal	0.816983	-0.237289	normal	0.952293	0.0790776	normal	0.953344	-0.0492438	normal	--	--	--	--	--	--
gene5950	VAX2	0.663946	30	0.589056	39	0.615277	58	1.22935	80	0.873395	59	0.640869	46	0.479352	16	0.384039	19	0.635364	26	0.342324	30	0.335439	28	0.214458	17	0.576041	0.423699	normal	0.830861	-0.188394	normal	0.571288	-0.434345	normal	0.277373	-0.76177	normal	0.0889346	0.816492	normal	0.687991	0.36772	normal	--	--	Biological Process: negative regulation of transcription from RNA polymerase II promoter (GO:0000122);; Molecular Function: transcription regulatory region sequence-specific DNA binding (GO:0000976);; Molecular Function: transcription factor activity, sequence-specific DNA binding (GO:0003700);; Cellular Component: nucleus (GO:0005634);; Cellular Component: cytoplasm (GO:0005737);; Biological Pro…	K09318|1.26856e-128|oas:101107945|K09318 homeobox protein ventral anterior | (RefSeq) VAX2; ventral anterior homeobox 2	--	[K]
gene22083	TGFBR2	26.6729	2746	26.3509	3519	32.3329	4868	29.704	3083	33.894	3190	22.7772	3481	29.419	1806	35.1617	2229	25.3552	1584	35.8904	5781	37.144	3954	28.8926	3474	0.905555	-0.0640512	normal	0.603832	-0.180434	normal	0.783112	0.173509	normal	0.728594	-0.121271	normal	0.601172	-0.241894	normal	0.202013	-0.36098	normal	[T]	Signal transduction mechanisms	Biological Process: branching involved in blood vessel morphogenesis (GO:0001569);; Biological Process: vasculogenesis (GO:0001570);; Biological Process: in utero embryonic development (GO:0001701);; Biological Process: positive regulation of mesenchymal cell proliferation (GO:0002053);; Biological Process: lens development in camera-type eye (GO:0002088);; Biological Process: positive regulation…	K04388|0|oas:494191|K04388 TGF-beta receptor type-2 [EC:2.7.11.30] | (RefSeq) TGFBR2; transforming growth factor beta receptor 2	MAPK signaling pathway (ko04010);; Cytokine-cytokine receptor interaction (ko04060);; FoxO signaling pathway (ko04068);; Endocytosis (ko04144);; TGF-beta signaling pathway (ko04350);; Osteoclast differentiation (ko04380);; Hippo signaling pathway (ko04390);; Adherens junction (ko04520);; AGE-RAGE signaling pathway in diabetic complications (ko04933);; Chagas disease (American trypanosomiasis) (ko…	[T]
gene26381	ACTA1	3.79045	303	3.89908	395	7.20583	876	2.43106	238	1.65354	138	1.7597	207	4.85134	293	57.1646	3284	7.6726	451	3.29037	398	2.84376	277	2.09424	211	0.00528289	-0.961936	normal	0.192551	0.854432	normal	0.151269	-0.609964	normal	0.00956871	1.81445	up	0.61937	-0.353708	normal	0.047704	1.13563	up	[Z]	Cytoskeleton	Cellular Component: stress fiber (GO:0001725);; Molecular Function: protein binding (GO:0005515);; Molecular Function: ATP binding (GO:0005524);; Cellular Component: striated muscle thin filament (GO:0005865);; Cellular Component: actin filament (GO:0005884);; Biological Process: response to virus (GO:0009615);; Biological Process: skeletal muscle thin filament assembly (GO:0030240);; Biological …	K10354|0|ssc:100154254|K10354 actin, alpha skeletal muscle | (RefSeq) ACTA1, ACTA; actin, alpha 1, skeletal muscle	--	[Z]
gene23050	IL17A	0	0	0	0	0	0	0	0	0	0	0	0	0	0	0	0	0	0	0.022624	2	0.08295	6	0	0	--	--	--	--	--	--	0.889302	0.0705062	normal	--	--	--	0.895075	-0.0814308	normal	0.740997	-0.134128	normal	--	--	Molecular Function: cytokine activity (GO:0005125);; Cellular Component: extracellular space (GO:0005615);; Cellular Component: external side of plasma membrane (GO:0009897);; Biological Process: positive regulation of interleukin-23 production (GO:0032747);; Biological Process: positive regulation of osteoclast differentiation (GO:0045672);; Biological Process: positive regulation of transcripti…	K05489|4.68539e-95|oas:101103931|K05489 interleukin 17A | (RefSeq) IL17A; interleukin 17A	Cytokine-cytokine receptor interaction (ko04060);; Inflammatory bowel disease (IBD) (ko05321);; Rheumatoid arthritis (ko05323)	--
gene7809	SCIN	27.3465	4072	28.1603	5339	37.8828	8691	15.0301	2721	8.8041	1319	14.0973	3026	11.9121	1274	26.9535	2975	28.1271	3070	12.307	2749	11.9149	2221	16.5906	3000	4.86978e-05	-1.06592	down	0.395328	-0.429923	normal	6.5115e-07	-1.03635	down	0.125955	0.69434	normal	0.968341	-0.0643003	normal	0.177608	0.599785	normal	--	--	Molecular Function: phosphatidylserine binding (GO:0001786);; Molecular Function: calcium ion binding (GO:0005509);; Molecular Function: phosphatidylinositol-4,5-bisphosphate binding (GO:0005546);; Cellular Component: cell cortex (GO:0005938);; Biological Process: negative regulation of cell proliferation (GO:0008285);; Biological Process: calcium ion regulated exocytosis (GO:0017156);; Biologica…	K05768|0|oas:101123369|K05768 gelsolin | (RefSeq) SCIN; scinderin	Fc gamma R-mediated phagocytosis (ko04666);; Regulation of actin cytoskeleton (ko04810);; Viral carcinogenesis (ko05203)	[Z]
gene4049	FAP	19.6371	3700	14.3012	3560	21.6627	6396	7.88492	2490	19.3448	3750	14.5103	4358	26.1106	3964	32.5356	5576	32.1089	4640	20.6786	6321	22.1974	5614	15.233	4664	0.767318	-0.218216	normal	0.000698413	0.804647	normal	0.733317	0.213195	normal	3.48633e-05	1.05584	up	0.228938	-0.438389	normal	0.00284178	0.587726	normal	[E]	Amino acid transport and metabolism	Molecular Function: protease binding (GO:0002020);; Molecular Function: serine-type endopeptidase activity (GO:0004252);; Cellular Component: extracellular space (GO:0005615);; Biological Process: proteolysis (GO:0006508);; Biological Process: negative regulation of extracellular matrix disassembly (GO:0010716);; Cellular Component: membrane (GO:0016020);; Cellular Component: lamellipodium (GO:00…	K08674|0|oas:101106492|K08674 fibroblast activation protein, alpha [EC:3.4.21.-] | (RefSeq) FAP; fibroblast activation protein alpha	--	[O]
gene23349	GPX5	0.05962	5	0	0	0.135317	15	0.072791	6	0.036554	3	0	0	0	0	0	0	0	0	0	0	0.069838	6	0	0	0.915165	-0.0670872	normal	0.603026	-0.263949	normal	0.906663	-0.0619577	normal	0.682274	-0.273143	normal	0.971701	0.030568	normal	0.747215	-0.123892	normal	[VI]	Defense mechanisms;; Lipid transport and metabolism	Molecular Function: glutathione peroxidase activity (GO:0004602);; Cellular Component: extracellular region (GO:0005576);; Biological Process: response to oxidative stress (GO:0006979);; Biological Process: oxidation-reduction process (GO:0055114);;	K00432|9.30011e-158|oas:100913163|K00432 glutathione peroxidase [EC:1.11.1.9] | (RefSeq) GPX5; glutathione peroxidase 5	Glutathione metabolism (ko00480);; Arachidonic acid metabolism (ko00590);; Thyroid hormone synthesis (ko04918)	[O]
gene14668	MPDU1	21.8571	1497	21.9403	1928	18.634	2004	21.4826	1830	22.0399	1564	22.7751	2375	23.8241	1195	19.3226	1035	23.6777	1194	20.8052	2208	21.1596	1870	19.7211	1781	0.689051	0.150189	normal	0.740746	0.102705	normal	0.955346	0.0399101	normal	0.856067	-0.0548721	normal	0.862175	0.105364	normal	0.836979	0.0587607	normal	--	--	Cellular Component: mitochondrion (GO:0005739);; Cellular Component: endoplasmic reticulum (GO:0005783);; Biological Process: oligosaccharide biosynthetic process (GO:0009312);;	K09660|3.73149e-151|oas:101102251|K09660 mannose-P-dolichol utilization defect 1 | (RefSeq) MPDU1; mannose-P-dolichol utilization defect 1	--	[R]
gene24434	LRFN4	0.148725	6	0.096799	5	0.129491	7	0.131753	6	0.075903	3	0.360741	18	0	0	0	0	0	0	0.444178	23	0.034149	2	0.16184	7	0.893664	0.128229	normal	0.322465	-0.537659	normal	0.911287	0.11477	normal	0.208944	-0.919772	normal	0.98977	-0.0219081	normal	0.284277	-0.563643	normal	--	--	--	K16357|3.10067e-124|oas:106991843|K16357 leucine-rich repeat and fibronectin type-III domain-containing protein 4 | (RefSeq) LRFN4; leucine rich repeat and fibronectin type III domain containing 4	--	[R]
gene20551	SLC9A3	0.189688	23	0.350152	54	0.285909	53	0.142918	21	0.14704	18	0.241009	42	0.070374	7	0.175847	16	0.185628	17	0.419471	75	0.236248	36	0.394591	58	0.749556	-0.324638	normal	0.460382	-0.568708	normal	0.889302	0.185167	normal	0.857731	-0.203554	normal	0.478026	-0.520394	normal	0.204878	-0.800036	normal	[P]	Inorganic ion transport and metabolism	Biological Process: sodium ion transport (GO:0006814);; Biological Process: regulation of pH (GO:0006885);; Molecular Function: sodium:proton antiporter activity (GO:0015385);; Cellular Component: integral component of membrane (GO:0016021);; Cellular Component: apical plasma membrane (GO:0016324);; Biological Process: transmembrane transport (GO:0055085);;	K12040|0|oas:494437|K12040 solute carrier family 9 (sodium/hydrogen exchanger), member 3 | (RefSeq) SLC9A3, NHE3; solute carrier family 9 member A3	Proximal tubule bicarbonate reclamation (ko04964);; Protein digestion and absorption (ko04974);; Bile secretion (ko04976);; Mineral absorption (ko04978)	[P]
gene13010	LRRC14	8.87478	878	10.6334	1227	9.8372	1374	11.5947	1352	9.19205	841	11.3667	1572	7.36766	493	7.77294	611	8.5495	571	13.0092	1871	9.71771	1112	11.8732	1318	0.774838	0.171666	normal	0.261196	-0.261986	normal	0.687581	0.216163	normal	0.10603	-0.448113	normal	0.970772	-0.0502874	normal	0.0559501	-0.486915	normal	--	--	--	--	--	--
gene10845	C6H4orf26	0	0	0	0	0	0	0	0	0	0	0	0	0	0	0	0	0	0	0	0	0	0	0	0	--	--	--	--	--	--	--	--	--	--	--	--	--	--	--	--	--	--	--	--	--	--	--	--
gene5399	FAM228B	1.72947	249	1.54632	338	1.01298	342	1.49417	356	2.21692	411	1.13298	404	2.23926	204	1.49381	263	1.55118	227	0.923825	371	1.18042	377	0.752075	291	0.329536	0.383887	normal	0.317979	0.332632	normal	0.925962	0.0875855	normal	0.86727	-0.086498	normal	0.666429	0.286965	normal	0.580496	0.233739	normal	--	--	--	--	--	--
gene21022	RITA1	5.52242	520	6.00589	688	3.75055	650	6.35676	725	4.97084	488	6.35119	868	5.22646	352	3.18348	227	3.23809	313	5.65219	784	6.15435	753	4.83687	520	0.746027	0.196899	normal	0.545981	-0.27193	normal	0.958307	0.0599099	normal	0.157694	-0.491175	normal	0.895075	0.127359	normal	0.423185	-0.334769	normal	--	--	Cellular Component: nucleus (GO:0005634);; Cellular Component: cytoplasm (GO:0005737);; Cellular Component: centrosome (GO:0005813);; Molecular Function: tubulin binding (GO:0015631);; Biological Process: neurogenesis (GO:0022008);; Biological Process: negative regulation of Notch signaling pathway (GO:0045746);; Biological Process: nuclear export (GO:0051168);;	--	--	--
gene7860	SP4	4.08897	1184	3.9749	1359	4.76695	1925	3.99819	1324	4.70777	1371	3.21211	1340	3.99664	771	4.11138	882	5.80488	864	3.73982	1584	3.91117	1417	3.68589	1296	0.974815	-0.0222598	normal	0.912429	-0.0379327	normal	0.889302	-0.098598	normal	0.968692	-0.0181633	normal	0.951643	0.0662196	normal	0.834514	0.0594961	normal	[R]	General function prediction only	Molecular Function: nucleic acid binding (GO:0003676);; Biological Process: regulation of transcription from RNA polymerase II promoter (GO:0006357);; Molecular Function: metal ion binding (GO:0046872);;	K09194|0|oas:101120237|K09194 transcription factor Sp4 | (RefSeq) SP4; Sp4 transcription factor	--	[R]
Ovis_aries_newGene_24133	--	0	0	0	0	0.235533	8	0	0	0	0	0.026844	1	0	0	0	0	0	0	0	0	0	0	0	0	0.879271	-0.0487547	normal	0.742307	-0.130974	normal	0.889302	-0.0509143	normal	--	--	--	--	--	--	--	--	--	--	--	Molecular Function: nucleic acid binding (GO:0003676);; Molecular Function: RNA-directed DNA polymerase activity (GO:0003964);; Cellular Component: intracellular (GO:0005622);; Cellular Component: fascia adherens (GO:0005916);; Biological Process: RNA-dependent DNA biosynthetic process (GO:0006278);; Biological Process: regulation of transcription, DNA-templated (GO:0006355);; Molecular Function:…	K09228|1.45348e-43|bta:100138479|K09228 KRAB domain-containing zinc finger protein | (RefSeq) zinc finger protein 510	--	--
gene10713	PAICS	4.92798	1094	3.84348	1087	4.41446	1510	4.21086	1136	4.96026	1108	3.81427	1221	5.27882	802	4.9827	820	4.55867	742	4.77699	1591	4.21901	1172	4.46636	1204	0.995182	0.00462971	normal	0.730974	0.125749	normal	0.976666	0.0291967	normal	0.69735	0.118326	normal	0.976209	-0.0313864	normal	0.748521	0.0918651	normal	[F]	Nucleotide transport and metabolism	--	K01587|0|oas:101117419|K01587 phosphoribosylaminoimidazole carboxylase / phosphoribosylaminoimidazole-succinocarboxamide synthase [EC:4.1.1.21 6.3.2.6] | (RefSeq) PAICS; phosphoribosylaminoimidazole carboxylase and phosphoribosylaminoimidazolesuccinocarboxamide synthase	Purine metabolism (ko00230)	[F]
gene3289	HEMGN	0.029843	5	0	0	0	0	0	0	0.074215	11	0.025883	6	0	0	0	0	0	0	0.019897	5	0.011922	3	0.012289	3	0.87193	0.0761668	normal	0.742782	-0.129753	normal	0.958104	0.0416263	normal	0.551371	-0.424631	normal	0.926232	0.098171	normal	0.536714	-0.32119	normal	--	--	Cellular Component: nucleoplasm (GO:0005654);; Biological Process: multicellular organism development (GO:0007275);; Biological Process: cell differentiation (GO:0030154);;	--	--	--
gene5977	FBXO41	0.062174	24	0.234445	28	0.196072	64	0.526389	70	0.092584	36	0.080027	45	0.038021	11	0.05326	16	0.112266	32	0.158853	49	0.057678	28	0.066115	31	0.791086	0.295252	normal	0.938653	-0.0864879	normal	0.973123	-0.0634062	normal	0.590706	-0.510246	normal	0.744588	0.374294	normal	0.990021	-0.0134644	normal	--	--	--	K10316|0|oas:101104391|K10316 F-box protein 41 | (RefSeq) FBXO41; F-box protein 41	--	[R]
gene20562	MRPL36	8.36927	361	9.57694	525	8.95545	594	9.52722	499	7.79942	338	9.86713	613	4.22129	131	5.87452	188	6.33901	201	8.58298	555	6.97988	377	8.90952	466	0.949017	0.045281	normal	0.0204039	-0.670687	normal	0.889302	-0.121049	normal	0.0224921	-0.734944	normal	0.895075	0.156855	normal	0.117412	-0.541412	normal	[J]	Translation, ribosomal structure and biogenesis	Molecular Function: structural constituent of ribosome (GO:0003735);; Cellular Component: mitochondrion (GO:0005739);; Cellular Component: ribosome (GO:0005840);; Biological Process: translation (GO:0006412);;	K02919|4.01241e-19|oas:101103507|K02919 large subunit ribosomal protein L36 | (RefSeq) MRPL36; mitochondrial ribosomal protein L36	Ribosome (ko03010)	[J]
gene22789	HSD17B8	4.13189	223	3.09136	204	9.69697	838	8.19028	497	5.65261	324	7.05118	517	9.17574	331	13.7254	529	8.51422	329	8.61358	729	7.28563	470	5.12733	321	0.860756	0.171784	normal	0.306883	0.615458	normal	0.904079	0.157111	normal	0.197521	0.493205	normal	0.994087	-0.0155437	normal	0.339277	0.451455	normal	[IQR]	Lipid transport and metabolism;; Secondary metabolites biosynthesis, transport and catabolism;; General function prediction only	Molecular Function: 3-hydroxyacyl-CoA dehydrogenase activity (GO:0003857);; Molecular Function: estradiol 17-beta-dehydrogenase activity (GO:0004303);; Cellular Component: mitochondrial envelope (GO:0005740);; Cellular Component: mitochondrial matrix (GO:0005759);; Cellular Component: plasma membrane (GO:0005886);; Biological Process: androgen metabolic process (GO:0008209);; Biological Process: …	K13370|6.20764e-94|oas:101116612|K13370 17beta-estradiol 17-dehydrogenase / 3alpha(17beta)-hydroxysteroid dehydrogenase (NAD+) [EC:1.1.1.62 1.1.1.239] | (RefSeq) HSD17B8; hydroxysteroid 17-beta dehydrogenase 8	Steroid hormone biosynthesis (ko00140)	[I]
gene24433	PC	4.97229	913	5.86659	1458	4.54376	1377	3.64362	880	3.69581	722	4.96842	1268	3.52775	414	3.31899	488	2.53918	346	3.24603	998	2.86154	660	3.42493	790	0.42205	-0.289569	normal	0.00177275	-0.759935	normal	0.00633606	-0.608792	normal	0.0879414	-0.476689	normal	0.391962	0.324296	normal	0.777202	-0.123169	normal	[C]	Energy production and conversion	Molecular Function: DNA binding (GO:0003677);; Molecular Function: biotin carboxylase activity (GO:0004075);; Molecular Function: pyruvate carboxylase activity (GO:0004736);; Molecular Function: ATP binding (GO:0005524);; Cellular Component: mitochondrial inner membrane (GO:0005743);; Cellular Component: mitochondrial matrix (GO:0005759);; Biological Process: gluconeogenesis (GO:0006094);; Biolog…	K01958|0|oas:101107484|K01958 pyruvate carboxylase [EC:6.4.1.1] | (RefSeq) PC; pyruvate carboxylase	Citrate cycle (TCA cycle) (ko00020);; Pyruvate metabolism (ko00620);; Carbon metabolism (ko01200);; Biosynthesis of amino acids (ko01230)	[C]
gene15683	IL19	0	0	0	0	0	0	0	0	0	0	0	0	0	0	0.089751	4	0	0	0.018153	2	0	0	0	0	--	--	--	0.739708	0.138415	normal	0.889302	0.0408127	normal	0.693796	0.235527	normal	0.895549	-0.0483183	normal	0.846354	0.0790952	normal	--	--	Biological Process: apoptotic process (GO:0006917);; Biological Process: interleukin-6 biosynthetic process (GO:0042226);; Biological Process: reactive oxygen species metabolic process (GO:0072593);;	K05444|9.20656e-131|oas:101112663|K05444 interleukin 19/20/24 | (RefSeq) IL19; interleukin 19	Jak-STAT signaling pathway (ko04630)	--
Ovis_aries_newGene_56598	--	0.158253	6	0.173236	9	0.214746	13	0.045215	3	0.301477	12	0.190914	11	0.076804	3	0.328128	9	0.109328	3	0.217515	12	0	0	0	0	0.994688	0.00878907	normal	0.974859	-0.0357179	normal	0.889302	-0.10653	normal	0.967428	-0.0594621	normal	0.895075	0.11916	normal	0.773757	0.187067	normal	--	--	--	--	--	--
gene2177	ST6GAL1	12.0544	1022	10.7028	1156	10.5658	1374	11.4477	1177	11.2325	940	9.52481	1172	18.8142	1113	16.9591	1050	16.2195	992	10.3362	1329	9.55763	997	9.94196	1007	0.970038	-0.0227111	normal	0.000255274	0.585462	normal	0.752347	-0.156469	normal	0.000951899	0.607757	normal	0.891553	0.12675	normal	3.02792e-07	0.743889	normal	--	--	Molecular Function: beta-galactoside alpha-2,6-sialyltransferase activity (GO:0003835);; Biological Process: protein glycosylation (GO:0006486);; Cellular Component: integral component of Golgi membrane (GO:0030173);;	K00778|0|oas:100913159|K00778 beta-galactoside alpha-2,6-sialyltransferase (sialyltransferase 1) [EC:2.4.99.1] | (RefSeq) ST6GAL1; ST6 beta-galactoside alpha-2,6-sialyltransferase 1	N-Glycan biosynthesis (ko00510);; Other types of O-glycan biosynthesis (ko00514)	[G]
Ovis_aries_newGene_52214	--	0.905538	24	1.10434	37	0.820038	33	0.70013	23	0.479107	13	0.746832	29	0.758223	15	0	0	0.456614	9	0.746966	30	0.540974	18	0.820524	26	0.839625	-0.254158	normal	0.624464	-0.436056	normal	0.889302	-0.210655	normal	0.770745	-0.324412	normal	0.988151	-0.0340367	normal	0.765285	-0.261553	normal	--	--	--	--	--	--
gene9376	IRF1	8.41873	557	10.4224	878	9.4291	961	6.24238	502	7.12955	475	8.00773	764	25.0386	1190	10.4747	514	13.1893	640	18.6574	1851	11.0682	917	15.2853	1228	0.24862	-0.344548	normal	0.113509	0.668343	normal	0.0641398	0.567876	normal	0.0057128	1.04627	up	0.000466431	-0.905588	normal	0.923717	0.0773993	normal	--	--	Cellular Component: nuclear chromatin (GO:0000790);; Molecular Function: RNA polymerase II core promoter proximal region sequence-specific DNA binding (GO:0000978);; Molecular Function: transcription factor activity, sequence-specific DNA binding (GO:0003700);; Cellular Component: cytoplasm (GO:0005737);; Biological Process: apoptotic process (GO:0006917);; Biological Process: cell cycle arrest (…	K09444|0|oas:443136|K09444 interferon regulatory factor 1 | (RefSeq) IRF1; interferon regulatory factor 1	Prolactin signaling pathway (ko04917);; Pertussis (ko05133);; Hepatitis C (ko05160)	--
Ovis_aries_newGene_33251	--	0.226418	19	0.086199	10	0.124637	16	0.131864	14	0.169304	15	0.138109	17	0	0	0.12809	8	0.049908	4	0.077138	10	0.05839	7	0.128678	13	0.982448	0.0293644	normal	0.688298	-0.36704	normal	0.889302	-0.202986	normal	0.615017	-0.552605	normal	0.874402	0.274652	normal	0.881921	-0.13915	normal	--	--	Biological Process: nucleotide-excision repair, DNA damage recognition (GO:0000715);; Molecular Function: damaged DNA binding (GO:0003684);; Molecular Function: single-stranded DNA binding (GO:0003697);; Molecular Function: receptor binding (GO:0005102);; Cellular Component: nucleolus (GO:0005730);; Cellular Component: plasma membrane (GO:0005886);; Biological Process: putrescine biosynthetic pro…	--	--	--
gene10046	CNOT8	10.8086	1536	11.7575	2164	8.84043	2283	8.43022	1899	10.9138	1399	7.78583	2090	12.243	1260	8.03619	1163	9.60513	1289	8.14238	2288	8.15397	1867	11.8209	2049	0.898336	-0.063939	normal	0.742307	0.0900469	normal	0.998786	-0.00220672	normal	0.576536	0.152051	normal	0.927824	-0.0682088	normal	0.758344	0.087506	normal	--	--	Biological Process: deadenylation-dependent decapping of nuclear-transcribed mRNA (GO:0000290);; Cellular Component: P-body (GO:0000932);; Molecular Function: transcription factor activity, sequence-specific DNA binding (GO:0003700);; Molecular Function: RNA binding (GO:0003723);; Molecular Function: poly(A)-specific ribonuclease activity (GO:0004535);; Molecular Function: protein binding (GO:000…	K12581|0|umr:103664556|K12581 CCR4-NOT transcription complex subunit 7/8 | (RefSeq) CNOT8; CCR4-NOT transcription complex subunit 8	RNA degradation (ko03018)	[A]
gene22036	GPR132	0.774247	74	0.282164	35	0.441342	65	0.55393	65	0.084733	9	0.065493	10	1.08445	75	0.493675	35	0.650792	46	0.76275	110	0.438034	53	0.741315	87	0.750725	-0.300081	normal	0.652275	0.393216	normal	0.889302	0.201516	normal	0.252653	0.954578	normal	0.572424	-0.440921	normal	0.890549	0.126748	normal	--	--	Biological Process: G1/S transition of mitotic cell cycle (GO:0000082);; Molecular Function: G-protein coupled receptor activity (GO:0004930);; Cellular Component: integral component of membrane (GO:0016021);;	K08426|0|oas:101105692|K08426 G protein-coupled receptor 132 | (RefSeq) GPR132; G protein-coupled receptor 132	--	--
gene28040	HTATSF1	8.24157	1432	7.47351	1654	24.8264	6633	20.8975	4406	10.902	1904	23.1315	5784	23.1019	2878	21.9922	2828	25.5825	3254	22.5945	5877	22.9034	4972	21.9383	4619	0.839625	0.21364	normal	0.242317	0.635993	normal	0.50574	0.457326	normal	0.582167	0.284755	normal	0.887187	-0.214229	normal	0.851416	0.047115	normal	--	--	Molecular Function: nucleotide binding (GO:0000166);; Molecular Function: nucleic acid binding (GO:0003676);; Cellular Component: nucleus (GO:0005634);;	K13093|0|oas:101104556|K13093 HIV Tat-specific factor 1 | (RefSeq) HTATSF1; HIV-1 Tat specific factor 1	--	[K]
gene25047	MTG1	9.99819	788	7.60957	802	7.85126	1051	9.31755	921	10.0966	846	9.35877	1179	5.87258	333	6.04107	363	6.60156	382	7.87634	968	8.41767	875	9.62267	901	0.527109	0.218361	normal	0.018733	-0.504651	normal	0.995544	-0.00632465	normal	9.69715e-06	-0.747193	normal	0.520909	0.220263	normal	0.0119815	-0.503673	normal	[J]	Translation, ribosomal structure and biogenesis	Molecular Function: GTPase activity (GO:0003924);; Molecular Function: GTP binding (GO:0005525);; Cellular Component: mitochondrial inner membrane (GO:0005743);; Cellular Component: mitochondrial ribosome (GO:0005761);; Biological Process: obsolete GTP catabolic process (GO:0006184);; Biological Process: ribosome biogenesis (GO:0042254);; Biological Process: regulation of respiratory system proce…	K19828|0|oas:101118653|K19828 mitochondrial GTPase 1 | (RefSeq) MTG1; mitochondrial ribosome associated GTPase 1	--	[R]
gene4195	TMEM163	0.224492	27	0.873045	64	0.284182	70	0.575865	52	0.306773	49	0.277406	64	0.552225	29	0.241318	29	1.05063	69	0.666116	78	0.441004	58	0.446976	76	0.921743	0.10994	normal	0.72328	0.333813	normal	0.889302	0.236067	normal	0.777077	0.248126	normal	0.902841	-0.161977	normal	0.950161	0.0622492	normal	--	--	Molecular Function: zinc ion binding (GO:0008270);; Cellular Component: cell junction (GO:0030054);; Cellular Component: integral component of synaptic vesicle membrane (GO:0030285);; Cellular Component: early endosome membrane (GO:0031901);;	--	--	--
gene171	CSF3R	0.426027	62	0.265612	61	0.370357	100	0.552554	81	0.237538	38	0.473437	120	1.06188	56	0.729773	94	0.987999	51	0.562274	110	0.676474	150	0.337029	76	0.937246	0.0928945	normal	0.379124	0.518808	normal	0.706855	0.352139	normal	0.62013	0.407627	normal	0.895075	-0.24916	normal	0.942632	0.0679506	normal	--	--	Molecular Function: cytokine receptor activity (GO:0004896);; Cellular Component: membrane (GO:0016020);; Biological Process: cytokine-mediated signaling pathway (GO:0019221);; Biological Process: neutrophil chemotaxis (GO:0030593);;	K05061|0|oas:101118070|K05061 granulocyte colony-stimulating factor receptor | (RefSeq) CSF3R; colony stimulating factor 3 receptor	Cytokine-cytokine receptor interaction (ko04060);; PI3K-Akt signaling pathway (ko04151);; Jak-STAT signaling pathway (ko04630);; Hematopoietic cell lineage (ko04640);; Pathways in cancer (ko05200)	--
gene2841	RAB14	33.2865	8410	30.6097	10935	26.773	13211	31.4599	9143	25.0887	8500	24.0309	11662	22.584	5456	25.8455	6050	25.4732	6287	25.7727	12648	30.7933	10268	39.5001	10373	0.839625	-0.0585462	normal	0.7019	-0.0851789	normal	0.96702	-0.0207223	normal	0.901771	-0.0309157	normal	0.929307	-0.0443777	normal	0.760387	-0.0685186	normal	[R]	General function prediction only	Molecular Function: protein binding (GO:0001948);; Molecular Function: GTPase activity (GO:0003924);; Molecular Function: GTP binding (GO:0005525);; Cellular Component: lysosome (GO:0005764);; Cellular Component: early endosome (GO:0005769);; Cellular Component: late endosome (GO:0005770);; Cellular Component: rough endoplasmic reticulum (GO:0005791);; Cellular Component: Golgi stack (GO:0005795)…	K07881|5.36755e-161|apla:101793367|K07881 Ras-related protein Rab-14 | (RefSeq) RAB14; RAB14, member RAS oncogene family	--	[U]
gene22652	LOC105606825	0	0	0	0	0.012317	3	0	0	0	0	0.005969	1	0	0	0	0	0	0	0	0	0	0	0	0	0.937246	-0.0273313	normal	0.764522	-0.108331	normal	0.889302	-0.0449711	normal	--	--	--	--	--	--	--	--	--	--	--	Molecular Function: methyltransferase activity (GO:0008168);; Biological Process: methylation (GO:0032259);;	K11393|0|oas:105606825|K11393 methyltransferase [EC:2.1.1.-] | (RefSeq) methyltransferase-like protein 16	--	[S]
gene28889	LOC101118515	0.697297	120	0.338335	74	0.593577	157	0.291931	61	0.568747	96	0.616831	150	2.99408	368	2.24123	284	2.04522	257	1.12004	281	1.14976	242	0.686651	143	0.938497	-0.0913204	normal	3.5203e-08	1.84725	up	0.296101	0.549586	normal	1.84284e-09	2.0817	up	0.153411	-0.683147	normal	0.00020657	1.16495	up	--	--	--	K06725|0|oas:101118515|K06725 leukocyte-associated Ig-like receptor | (RefSeq) LAIR1; leukocyte-associated immunoglobulin-like receptor 1	--	--
gene18601	ETFB	79.301	3673	79.7392	4686	85.6392	6101	94.8477	5316	69.7132	3276	94.3632	6287	100.114	3327	77.3695	2645	97.3061	3328	85.6159	6012	107.894	6215	108.202	6042	0.839625	0.109383	normal	0.600172	0.151236	normal	0.277006	0.285459	normal	0.950818	0.0307748	normal	0.866626	-0.17395	normal	0.701691	-0.147464	normal	[C]	Energy production and conversion	Cellular Component: mitochondrial matrix (GO:0005759);; Molecular Function: electron carrier activity (GO:0009055);; Biological Process: electron transport chain (GO:0022900);;	K03521|4.26188e-171|oas:101110082|K03521 electron transfer flavoprotein beta subunit | (RefSeq) ETFB; electron transfer flavoprotein beta subunit	--	[C]
gene1406	LRRC71	0.461918	62	0.504915	76	0.624762	135	0.377813	75	0.528465	63	0.784711	135	1.05672	85	0.596001	58	0.431905	52	1.10951	217	0.582304	105	0.305361	69	0.955426	0.0632379	normal	0.72069	0.276497	normal	0.876167	0.259536	normal	0.773665	0.212001	normal	0.895075	-0.224515	normal	0.929744	-0.0843688	normal	--	--	--	--	--	[S]
gene9885	LOC101102310	0.229669	44	0.322853	78	0.273174	80	0.265571	62	0.294333	57	0	0	0.176396	24	0.183223	26	0.18505	26	0.169028	49	0.10837	26	0.221048	51	0.909343	-0.106845	normal	0.424419	-0.493765	normal	0.59833	-0.417385	normal	0.976441	-0.0419749	normal	0.983574	0.034452	normal	0.944092	0.0719311	normal	[S]	Function unknown	Molecular Function: calcium ion binding (GO:0005509);; Cellular Component: plasma membrane (GO:0005886);; Biological Process: homophilic cell adhesion via plasma membrane adhesion molecules (GO:0007156);; Cellular Component: integral component of membrane (GO:0016021);;	K16494|0|oas:101102310|K16494 protocadherin beta | (RefSeq) PCDHB14; protocadherin beta-14	--	[S]
Ovis_aries_newGene_52689	--	0.637575	37	0.654283	53	0.381442	40	0.603968	52	0.623375	43	0.370228	37	0.37464	20	0.416591	20	0.429505	20	0.448793	44	0.697134	51	0.449829	33	0.952952	0.0708417	normal	0.745509	-0.267701	normal	0.976181	-0.0568194	normal	0.668463	-0.389831	normal	0.946207	0.125241	normal	0.820344	-0.192699	normal	--	--	Molecular Function: SNARE binding (GO:0000149);; Molecular Function: SNAP receptor activity (GO:0005484);; Cellular Component: cell-cell junction (GO:0005911);; Biological Process: intracellular protein transport (GO:0006886);; Cellular Component: synaptic vesicle (GO:0008021);; Biological Process: positive regulation of cell proliferation (GO:0008284);; Cellular Component: integral component of …	K08486|1.42466e-08|phd:102316687|K08486 syntaxin 1B/2/3 | (RefSeq) STX3; syntaxin 3	SNARE interactions in vesicular transport (ko04130);; Synaptic vesicle cycle (ko04721)	[U]
gene16469	IPO9	25.9099	4901	29.6479	7839	27.8545	8740	27.7672	5968	26.5385	4970	32.0674	7735	29.0399	3373	17.385	3345	21.8258	3450	29.9309	8480	27.0667	6131	28.1556	6706	0.839625	-0.101817	normal	0.137724	-0.274836	normal	0.941835	-0.0532445	normal	0.302266	-0.177089	normal	0.935281	-0.0548656	normal	0.187774	-0.224942	normal	--	--	Cellular Component: nucleus (GO:0005634);; Cellular Component: cytoplasm (GO:0005737);; Biological Process: protein import into nucleus (GO:0006606);; Molecular Function: Ran GTPase binding (GO:0008536);; Molecular Function: protein transporter activity (GO:0008565);; Molecular Function: histone binding (GO:0042393);;	K20224|0|oas:101113164|K20224 importin-9 | (RefSeq) IPO9; importin 9	--	[UY]
gene8577	LOC105615133	0.375951	22	0.471616	34	0.266668	26	0.374529	30	0.302296	15	0.322623	30	4.92236	186	0.981181	46	1.22845	44	0.935077	90	1.0509	83	0.694625	53	0.975905	-0.0382779	normal	0.00416605	1.51861	up	0.0446448	0.812253	normal	0.00226	1.86317	up	0.0434824	-0.883069	normal	0.290605	0.71566	normal	--	--	Molecular Function: GTP binding (GO:0005525);; Cellular Component: nucleus (GO:0005634);; Cellular Component: cytoplasm (GO:0005737);;	--	--	--
gene12233	LOC101115626	0.025962	6	0.042697	11	0.035835	11	0.057114	14	0.053927	11	0.038261	11	0.032648	5	0.094034	14	0.079213	12	0.0523	16	0.054981	14	0.047896	12	0.860024	0.172131	normal	0.605168	0.468387	normal	0.889302	0.17983	normal	0.805834	0.276175	normal	0.992013	-0.0231824	normal	0.831442	0.207717	normal	[R]	General function prediction only	Cellular Component: chromatin (GO:0000785);; Molecular Function: chromatin binding (GO:0003682);; Molecular Function: transcription coactivator activity (GO:0003713);; Molecular Function: GTPase activity (GO:0003924);; Molecular Function: GTP binding (GO:0005525);; Cellular Component: nuclear pore (GO:0005643);; Cellular Component: nucleoplasm (GO:0005654);; Cellular Component: cytosol (GO:000582…	K07936|3.3997e-136|fca:101080666|K07936 GTP-binding nuclear protein Ran | (RefSeq) RAN; RAN, member RAS oncogene family	Ribosome biogenesis in eukaryotes (ko03008);; RNA transport (ko03013);; HTLV-I infection (ko05166);; Epstein-Barr virus infection (ko05169)	[U]
gene19599	LOC101102334	0	0	0	0	0	0	0	0	0	0	0	0	0	0	0.109148	13	0	0	0	0	0.007469	2	0	0	--	--	--	0.733224	0.155385	normal	0.889302	0.0423282	normal	0.679056	0.269318	normal	0.895549	-0.0501712	normal	0.740997	0.152123	normal	--	--	--	K19977|0|oas:101102334|K19977 ADP-ribosyltransferase 5 [EC:2.4.2.31] | (RefSeq) ecto-ADP-ribosyltransferase 5-like	--	--
gene10315	C6H4orf3	106.886	5309	90.5372	5688	111.256	8419	117.437	6607	121.4	5700	116.712	7765	129.716	4143	137.463	4822	164.04	5824	107.436	7272	113.384	7170	113.429	6828	0.728379	0.136933	normal	0.11451	0.378151	normal	0.892262	0.0840746	normal	0.330228	0.240488	normal	0.955829	0.0441419	normal	0.287556	0.287022	normal	--	--	--	--	--	--
gene28403	LOC101101875	0	0	0	0	0	0	0	0	0	0	0	0	0	0	0	0	0	0	0	0	0	0	0	0	--	--	--	--	--	--	--	--	--	--	--	--	--	--	--	--	--	--	--	--	Molecular Function: nucleic acid binding (GO:0003676);; Cellular Component: nucleus (GO:0005634);; Biological Process: regulation of transcription, DNA-templated (GO:0006355);; Molecular Function: metal ion binding (GO:0046872);;	K20796|0|oas:101101875|K20796 histone-lysine N-methyltransferase PRDM7/9 [EC:2.1.1.43] | (RefSeq) probable histone-lysine N-methyltransferase PRDM7	--	[K]
gene8984	NANOS3	0.069376	16	0.108736	31	0.081144	28	0.052928	14	0.055215	13	0.086418	28	0.01293	3	0.037579	7	0.175488	28	0.052402	18	0.10366	29	0.049616	14	0.855903	-0.182813	normal	0.940118	-0.0867682	normal	0.921943	-0.135962	normal	0.94314	0.103082	normal	0.99123	-0.0249442	normal	0.959872	0.0543646	normal	--	--	Cellular Component: P-body (GO:0000932);; Molecular Function: RNA binding (GO:0003723);; Cellular Component: nucleus (GO:0005634);; Biological Process: regulation of translation (GO:0006417);; Biological Process: germ cell development (GO:0007281);; Biological Process: spermatogenesis (GO:0007283);; Molecular Function: zinc ion binding (GO:0008270);; Cellular Component: cytoplasmic stress granule…	K18761|3.62614e-97|oas:101120409|K18761 protein nanos 3 | (RefSeq) NANOS3; nanos C2HC-type zinc finger 3	--	[R]
gene5508	TIA1	15.6198	5862	14.1395	7212	14.4851	8977	14.1507	5811	15.5363	6314	13.8353	7206	13.1505	4255	14.0836	4475	21.134	5399	14.3292	7868	14.4935	7199	11.1217	5915	0.840366	-0.0825848	normal	0.605168	0.137122	normal	0.789771	-0.123165	normal	0.400352	0.218459	normal	0.974227	0.0328734	normal	0.24602	0.257544	normal	[J]	Translation, ribosomal structure and biogenesis	Molecular Function: nucleotide binding (GO:0000166);; Cellular Component: nucleus (GO:0005634);; Cellular Component: cytoplasmic stress granule (GO:0010494);; Molecular Function: AU-rich element binding (GO:0017091);; Biological Process: negative regulation of translation (GO:0017148);; Biological Process: negative regulation of cytokine biosynthetic process (GO:0042036);; Biological Process: reg…	K13201|0|oas:101105642|K13201 nucleolysin TIA-1/TIAR | (RefSeq) TIA1; TIA1 cytotoxic granule associated RNA binding protein	--	[AJ]
gene12394	PKIB	13.4593	1249	15.4667	1836	13.4402	1904	12.8562	1432	12.6098	1126	8.41586	1053	21.0654	1356	16.67	1158	21.5257	1343	9.04383	1197	11.4267	1310	12.7953	1347	0.532588	-0.301694	normal	0.034073	0.400814	normal	0.268556	-0.365881	normal	0.00820934	0.722519	normal	0.976209	0.0477927	normal	0.000431775	0.776438	normal	--	--	Molecular Function: cAMP-dependent protein kinase inhibitor activity (GO:0004862);;	--	--	--
gene16671	PTER	4.87714	451	4.12094	484	4.21109	596	4.22884	449	3.73198	347	3.49278	463	4.29055	285	4.63744	317	5.26717	334	3.86916	535	3.45823	397	3.32286	377	0.73738	-0.185052	normal	0.895925	0.0562573	normal	0.476268	-0.276896	normal	0.44081	0.248238	normal	0.920556	0.0877788	normal	0.176663	0.344626	normal	[R]	General function prediction only	Molecular Function: zinc ion binding (GO:0008270);; Biological Process: catabolic process (GO:0009056);; Molecular Function: hydrolase activity, acting on ester bonds (GO:0016788);;	K07048|0|oas:101109988|K07048 phosphotriesterase-related protein | (RefSeq) PTER; phosphotriesterase related	--	--
Ovis_aries_newGene_48445	--	0.100614	11	0.246374	35	0.185612	32	0.242489	33	0.03637	4	0.169124	27	0.05165	5	0.124258	10	0.181865	15	0.101825	17	0.04987	7	0.296169	40	0.957429	-0.0628044	normal	0.751801	-0.297951	normal	0.964851	-0.0687119	normal	0.873093	-0.201506	normal	0.997373	0.0106155	normal	0.901197	-0.133022	normal	--	--	Molecular Function: G-protein coupled receptor activity (GO:0004930);; Molecular Function: binding (GO:0005488);; Cellular Component: mitochondrion (GO:0005739);; Biological Process: signal transduction (GO:0007165);; Molecular Function: transferase activity, transferring phosphorus-containing groups (GO:0016772);; Cellular Component: intrinsic component of membrane (GO:0031224);; Biological Proc…	K08111|8.2512e-11|bom:102284894|K08111 glypican 5 | (RefSeq) GPC5, Glypican-5; glypican 5	--	--
gene19349	LOC101108857	0	0	0	0	0	0	0	0	0	0	0	0	0	0	0	0	0	0	0	0	0	0	0	0	--	--	--	--	--	--	--	--	--	--	--	--	--	--	--	--	--	--	--	--	Molecular Function: G-protein coupled receptor activity (GO:0004930);; Molecular Function: olfactory receptor activity (GO:0004984);; Cellular Component: plasma membrane (GO:0005886);; Biological Process: G-protein coupled receptor signaling pathway (GO:0007186);; Cellular Component: integral component of membrane (GO:0016021);; Biological Process: detection of chemical stimulus involved in senso…	K04257|0|oas:101108857|K04257 olfactory receptor | (RefSeq) olfactory receptor 2AG1-like	Olfactory transduction (ko04740)	--
Ovis_aries_newGene_51106	--	0.322312	13	0.048141	3	0.527597	19	0.271613	14	0.179564	8	0.200348	11	0	0	0.670662	15	0.229328	5	0.101717	7	0.04413	3	0.192165	9	0.998553	0.00214481	normal	0.994138	-0.00893598	normal	0.889302	-0.176357	normal	0.988823	-0.0203693	normal	0.878435	0.249018	normal	0.792283	0.207164	normal	--	--	--	--	--	--
Ovis_aries_newGene_54115	--	0	0	0.143824	3	0.159212	4	0.046446	1	0	0	0	0	0	0	0.571521	6	0	0	0.246437	6	0	0	0	0	0.840366	-0.0734381	normal	0.927514	0.0560872	normal	0.989497	-0.0100791	normal	0.744203	0.191642	normal	0.940639	-0.0384515	normal	0.92343	0.0457246	normal	--	--	--	--	--	--
Ovis_aries_newGene_34739	--	0.090566	75	0.275931	290	0.17286	220	0.141062	142	0.133574	111	0.136286	162	0.12292	73	0.307203	188	0.184459	112	0.157607	195	0.132392	137	0.11492	115	0.839625	-0.23798	normal	0.892865	0.130136	normal	0.886916	-0.247384	normal	0.458285	0.470156	normal	0.983059	0.0379227	normal	0.443379	0.47416	normal	--	--	Molecular Function: RNA-directed DNA polymerase activity (GO:0003964);; Molecular Function: ion channel activity (GO:0005216);; Biological Process: RNA-dependent DNA biosynthetic process (GO:0006278);; Cellular Component: membrane (GO:0016020);; Biological Process: ion transmembrane transport (GO:0034220);;	--	--	--
gene12225	TMED8	5.52169	2066	4.59586	2309	4.1019	2537	3.2437	1577	3.96588	1594	2.99628	1775	5.00761	1333	4.96077	1151	4.49543	851	4.85541	3030	3.59586	1829	2.44685	1245	0.137462	-0.372377	normal	0.476943	-0.272146	normal	0.814616	-0.241149	normal	0.812831	0.102571	normal	0.948782	-0.0921349	normal	0.995158	0.00381416	normal	--	--	Biological Process: transport (GO:0006810);; Cellular Component: integral component of membrane (GO:0016021);;	--	--	[U]
gene17538	PLCG2	4.44415	818	4.31494	1107	4.79941	1273	5.96218	1190	5.95991	1094	4.39437	1111	4.90329	705	4.0768	540	4.08685	495	5.74979	1691	5.19766	1163	5.39528	1210	0.720758	0.186405	normal	0.83984	-0.0870143	normal	0.304826	0.265568	normal	0.45075	-0.286013	normal	0.938627	-0.0784392	normal	0.246183	-0.356665	normal	--	--	Biological Process: follicular B cell differentiation (GO:0002316);; Molecular Function: phosphatidylinositol phospholipase C activity (GO:0004435);; Molecular Function: signal transducer activity (GO:0004871);; Molecular Function: phospholipid binding (GO:0005543);; Cellular Component: cytosol (GO:0005829);; Cellular Component: plasma membrane (GO:0005886);; Biological Process: phosphatidylinosi…	K05859|0|oas:101122126|K05859 phosphatidylinositol phospholipase C, gamma-2 [EC:3.1.4.11] | (RefSeq) PLCG2; phospholipase C gamma 2	Inositol phosphate metabolism (ko00562);; EGFR tyrosine kinase inhibitor resistance (ko01521);; ErbB signaling pathway (ko04012);; Ras signaling pathway (ko04014);; Calcium signaling pathway (ko04020);; NF-kappa B signaling pathway (ko04064);; HIF-1 signaling pathway (ko04066);; Phosphatidylinositol signaling system (ko04070);; Phospholipase D signaling pathway (ko04072);; Axon guidance (ko04360)…	[I]
Ovis_aries_newGene_13740	--	0.172946	5	0	0	0	0	0.1765	6	0.21352	6	0	0	0.335393	7	0.370604	7	0.395783	8	0	0	1.36978	44	0.427069	14	0.915185	0.0525134	normal	0.497934	0.444045	normal	0.841075	0.133576	normal	0.615319	0.540293	normal	0.864403	-0.170252	normal	0.853091	-0.161049	normal	--	--	--	--	--	--
gene5179	RPL12	467.038	13564	443.625	16609	541.017	24419	526.556	18729	404.43	11927	472.21	20098	326.653	7669	403.629	8955	465.381	10480	477.847	21222	467.05	17143	490.921	17442	0.992247	-0.00819757	normal	0.486097	-0.204005	normal	0.99447	-0.00683921	normal	0.549902	-0.202214	normal	0.995238	-0.0082176	normal	0.437474	-0.202377	normal	[J]	Translation, ribosomal structure and biogenesis	Molecular Function: RNA binding (GO:0003723);; Molecular Function: structural constituent of ribosome (GO:0003735);; Cellular Component: ribosome (GO:0005840);; Biological Process: translation (GO:0006412);;	K02870|9.69755e-144|oas:101111087|K02870 large subunit ribosomal protein L12e | (RefSeq) RPL12; ribosomal protein L12	Ribosome (ko03010)	[J]
gene22136	SLC22A14	0.306654	73	0.421916	128	0.740996	170	0.559203	106	0.494826	116	0.360529	122	0.344356	35	0.482548	42	0.090575	17	0.545711	150	0.595992	143	0.869509	153	0.980709	0.0271289	normal	0.0911011	-0.885018	normal	0.889302	0.195929	normal	0.0613484	-1.01685	normal	0.895075	-0.186099	normal	0.0154216	-1.11103	down	[G]	Carbohydrate transport and metabolism	Cellular Component: integral component of membrane (GO:0016021);; Molecular Function: transmembrane transporter activity (GO:0022857);;	K08210|0|oas:101115994|K08210 MFS transporter, OCT family, solute carrier family 22 (organic cation transporter), member 14 | (RefSeq) SLC22A14; solute carrier family 22 member 14	--	[R]
Ovis_aries_newGene_11650	--	0.214464	20	0.273827	32	0.3889	54	0.349	38	0.678011	61	0.421668	55	0.445797	29	0.495547	33	0.654121	43	0.41266	56	0.127934	15	0.281358	31	0.611462	0.407453	normal	0.334726	0.612536	normal	0.98332	-0.0425606	normal	0.93164	0.0905834	normal	0.72502	0.38859	normal	0.396604	0.604855	normal	--	--	Molecular Function: nucleic acid binding (GO:0003676);; Molecular Function: RNA-directed DNA polymerase activity (GO:0003964);; Molecular Function: phospholipid binding (GO:0005543);; Cellular Component: proteinaceous extracellular matrix (GO:0005578);; Cellular Component: intracellular (GO:0005622);; Cellular Component: plasma membrane (GO:0005886);; Cellular Component: fascia adherens (GO:00059…	--	--	[R]
gene26816	RASSF4	6.03142	883	5.87686	1021	6.99847	1594	3.78259	595	5.19624	531	5.69115	1116	10.3897	741	5.857	619	8.71801	855	5.54527	1198	7.17916	1102	6.31184	1112	0.138849	-0.498193	normal	0.742769	0.134445	normal	0.943227	-0.061342	normal	0.0269277	0.676125	normal	0.240305	-0.446855	normal	0.597383	0.194002	normal	--	--	Biological Process: signal transduction (GO:0007165);;	K09851|0|oas:101120631|K09851 Ras association domain-containing protein 2/4 | (RefSeq) RASSF4; Ras association domain family member 4	Hippo signaling pathway -multiple species (ko04392)	[T]
gene9316	RAX2	0.035119	1	0.027264	1	0.06931	4	0.029284	2	0.151673	5	0.024696	2	0.046602	1	0	0	0	0	0.134632	6	0	0	0.111975	4	0.89504	0.0966275	normal	0.80482	-0.137326	normal	0.952149	0.0515904	normal	0.668756	-0.375576	normal	0.994414	0.0114441	normal	0.760387	-0.148918	normal	--	--	Molecular Function: transcription factor activity, sequence-specific DNA binding (GO:0003700);; Cellular Component: nucleus (GO:0005634);; Biological Process: transcription, DNA-templated (GO:0006351);; Biological Process: visual perception (GO:0007601);; Molecular Function: sequence-specific DNA binding (GO:0043565);; Biological Process: response to stimulus (GO:0050896);;	K09333|1.72257e-80|oas:101117417|K09333 retina and anterior neural fold homeobox-like protein | (RefSeq) RAX2; retina and anterior neural fold homeobox 2	--	[R]
gene6475	ADCY6	7.49264	2163	10.1018	3723	11.1667	4612	8.99539	2905	5.93687	2160	10.3902	4366	8.55293	1621	7.37965	1529	8.36973	1913	12.0034	5339	10.4648	3840	10.1639	3594	0.940495	-0.0567015	normal	0.498432	-0.227049	normal	0.67478	0.224017	normal	0.64756	-0.173942	normal	0.496701	-0.28918	normal	0.0111118	-0.473876	normal	[T]	Signal transduction mechanisms	Molecular Function: adenylate cyclase activity (GO:0004016);; Molecular Function: ATP binding (GO:0005524);; Cellular Component: cilium (GO:0005929);; Biological Process: dopamine receptor signaling pathway (GO:0007212);; Biological Process: cyclic nucleotide biosynthetic process (GO:0009190);; Cellular Component: integral component of membrane (GO:0016021);; Biological Process: intracellular sig…	K08046|0|oas:101105735|K08046 adenylate cyclase 6 [EC:4.6.1.1] | (RefSeq) ADCY6; adenylate cyclase 6	Purine metabolism (ko00230);; Endocrine resistance (ko01522);; Rap1 signaling pathway (ko04015);; cGMP-PKG signaling pathway (ko04022);; cAMP signaling pathway (ko04024);; Chemokine signaling pathway (ko04062);; Phospholipase D signaling pathway (ko04072);; Oocyte meiosis (ko04114);; Longevity regulating pathway (ko04211);; Longevity regulating pathway - multiple species (ko04213);; Adrenergic si…	[C]
gene18245	ATP5SL	18.2952	1731	18.081	2362	18.1033	2751	19.5913	2165	20.8307	2030	20.6049	2942	20.4665	1461	15.8671	1168	18.8665	1397	18.2588	2648	20.1601	2465	20.2005	2425	0.612817	0.144	normal	0.954524	0.0214909	normal	0.889302	0.090901	normal	0.67976	-0.128361	normal	0.956089	0.0447747	normal	0.825102	-0.0750176	normal	--	--	Cellular Component: mitochondrion (GO:0005739);;	--	--	[S]
gene13878	WASF3	11.0726	2421	10.4111	2816	13.9458	4584	9.00227	2354	11.8936	2605	10.554	3379	8.40473	1358	9.17267	1442	12.1213	1910	12.7935	4244	11.8863	3295	10.969	2922	0.839625	-0.11258	normal	0.496944	-0.242752	normal	0.961896	0.045062	normal	0.703919	-0.134049	normal	0.764475	-0.16755	normal	0.280905	-0.295782	normal	--	--	Molecular Function: actin binding (GO:0003779);; Biological Process: cytoskeleton organization (GO:0007010);; Biological Process: regulation of cell shape (GO:0008360);; Biological Process: oligodendrocyte development (GO:0014003);; Cellular Component: lamellipodium (GO:0030027);; Biological Process: lamellipodium assembly (GO:0030032);; Biological Process: positive regulation of myelination (GO:…	K06083|0|oas:101114880|K06083 WAS protein family, member 3 | (RefSeq) WASF3; WAS protein family member 3	Adherens junction (ko04520);; Fc gamma R-mediated phagocytosis (ko04666);; Choline metabolism in cancer (ko05231)	[Z]
Ovis_aries_newGene_27488	--	0.24989	9	0	0	0	0	0.180117	8	0.115965	5	0	0	0.136656	4	0	0	0	0	0.10189	6	0.036761	2	0.047797	3	0.971363	0.019735	normal	0.945496	-0.0349318	normal	0.994773	-0.00708018	normal	0.862193	-0.150735	normal	0.96546	0.0569397	normal	0.925273	-0.0696379	normal	--	--	Cellular Component: mitochondrion (GO:0005739);; Cellular Component: ribosome (GO:0005840);;	K02907|2.24067e-18|aml:100480423|K02907 large subunit ribosomal protein L30 | (RefSeq) MRPL30; mitochondrial ribosomal protein L30	Ribosome (ko03010)	[J]
gene4593	SP140	3.93943	547	3.76469	666	3.0995	830	2.92227	565	3.15292	536	3.32488	782	10.9181	1069	8.55071	590	7.79138	862	5.24938	1147	4.00205	834	4.7821	682	0.951896	-0.0324674	normal	0.000285272	1.00408	up	0.451016	0.282489	normal	0.000180795	1.06417	up	0.371669	-0.321414	normal	0.0284126	0.707131	normal	--	--	--	--	--	[O]
gene15188	LOC105612015	0.415563	29	0.64697	58	0.500056	54	0.775568	66	0.795015	56	0.682449	69	0.611535	31	0.344788	18	0.511659	27	0.942704	99	0.555452	49	0.758022	65	0.61579	0.379413	normal	0.94736	-0.0681049	normal	0.779454	0.322616	normal	0.43426	-0.547257	normal	0.998181	0.00744063	normal	0.510735	-0.47012	normal	[K]	Transcription	Molecular Function: RNA binding (GO:0003723);; Cellular Component: U7 snRNP (GO:0005683);; Cellular Component: U12-type spliceosomal complex (GO:0005689);; Biological Process: mRNA processing (GO:0006397);; Biological Process: RNA splicing (GO:0008380);; Cellular Component: catalytic step 2 spliceosome (GO:0071013);;	K11098|2.02664e-51|oas:105612015|K11098 small nuclear ribonucleoprotein F | (RefSeq) small nuclear ribonucleoprotein F-like	Spliceosome (ko03040)	[A]
gene23125	CFB	4.51649	631	4.09763	729	3.98332	854	3.97044	675	4.7173	662	3.66167	727	6.3372	620	5.68162	576	5.40446	547	7.9448	1630	6.50884	1132	6.27793	1066	0.994583	-0.00587782	normal	0.033986	0.414675	normal	0.000144481	0.656614	normal	0.0708414	0.418876	normal	0.00122679	-0.66486	normal	0.268837	-0.27585	normal	[O]	Posttranslational modification, protein turnover, chaperones	Molecular Function: serine-type endopeptidase activity (GO:0004252);; Cellular Component: extracellular region (GO:0005576);; Biological Process: proteolysis (GO:0006508);; Biological Process: complement activation, alternative pathway (GO:0006957);;	K01335|0|oas:101115072|K01335 component factor B [EC:3.4.21.47] | (RefSeq) CFB; complement factor B	Complement and coagulation cascades (ko04610);; Staphylococcus aureus infection (ko05150)	[E]
gene9588	TRIM58	0	0	0	0	0	0	0.012391	3	0	0	0	0	0	0	0	0	0	0	0.009941	2	0	0	0	0	0.839625	0.058912	normal	--	--	--	0.889302	0.0408127	normal	0.717084	-0.196376	normal	0.976209	0.0185064	normal	0.780683	-0.0924657	normal	--	--	Cellular Component: intracellular (GO:0005622);; Molecular Function: zinc ion binding (GO:0008270);;	K12027|0|oas:101109795|K12027 tripartite motif-containing protein 58 [EC:2.3.2.27] | (RefSeq) TRIM58; tripartite motif containing 58	--	[O]
gene25691	TRAP1	13.4943	1568	14.4601	2122	13.231	2398	17.8776	2514	18.5664	2210	17.3892	2951	12.1376	1006	10.7605	931	12.904	1092	14.0859	2500	15.0665	2225	16.6796	2388	0.00121661	0.414598	normal	0.264693	-0.219506	normal	0.677429	0.168296	normal	1.08115e-05	-0.646561	normal	0.412961	0.231729	normal	0.0433524	-0.394273	normal	[O]	Posttranslational modification, protein turnover, chaperones	Molecular Function: ATP binding (GO:0005524);; Cellular Component: mitochondrial inner membrane (GO:0005743);; Cellular Component: mitochondrial matrix (GO:0005759);; Biological Process: protein folding (GO:0006457);; Biological Process: cellular response to oxidative stress (GO:0034599);; Molecular Function: unfolded protein binding (GO:0051082);; Biological Process: negative regulation of cellu…	K09488|0|oas:101123343|K09488 TNF receptor-associated protein 1 | (RefSeq) TRAP1; TNF receptor associated protein 1	--	[O]
Ovis_aries_newGene_58629	--	0	0	0.122751	12	0.181312	21	0.07311	7	0.082503	7	0.208439	22	0.038534	3	0.336968	19	0	0	0.147495	17	0.068223	7	0.104394	10	0.957386	0.0507293	normal	0.944611	0.0599076	normal	0.991322	0.0162593	normal	0.99054	0.0172267	normal	0.977899	0.0546813	normal	0.951686	0.0583029	normal	--	--	Molecular Function: voltage-gated ion channel activity (GO:0005244);; Molecular Function: sodium channel activity (GO:0005272);; Biological Process: sodium ion transport (GO:0006814);; Cellular Component: integral component of membrane (GO:0016021);; Biological Process: ion transmembrane transport (GO:0034220);; Cellular Component: cell part (GO:0044464);; Biological Process: biological regulatio…	K10838|3.12261e-08|oas:101109650|K10838 xeroderma pigmentosum group C-complementing protein | (RefSeq) XPC; XPC complex subunit, DNA damage recognition and repair factor	Nucleotide excision repair (ko03420)	--
gene12046	ZBTB25	1.63005	391	2.62364	830	2.80801	1033	1.72557	568	4.21536	797	0.657154	251	2.65879	465	2.35296	437	2.60627	550	1.67344	561	2.44333	719	2.74115	835	0.896534	-0.144807	normal	0.740203	0.181122	normal	0.978024	-0.0474473	normal	0.63257	0.373305	normal	0.955829	-0.108603	normal	0.689453	0.231372	normal	--	--	Molecular Function: DNA binding (GO:0003677);; Cellular Component: nucleus (GO:0005634);; Cellular Component: cytoplasm (GO:0005737);; Biological Process: gene expression (GO:0010467);; Molecular Function: metal ion binding (GO:0046872);;	K10504|0|phd:102333536|K10504 zinc finger and BTB domain-containing protein 25 | (RefSeq) ZBTB25; zinc finger and BTB domain containing 25	--	[R]
Ovis_aries_newGene_36622	--	0.358782	5	0	0	0	0	0	0	0	0	0	0	0	0	0	0	0	0	0	0	0	0	0	0	0.839625	-0.0634941	normal	0.742782	-0.129753	normal	0.889302	-0.0505989	normal	--	--	--	--	--	--	--	--	--	--	--	--	--	--	--
gene10700	TMEM165	5.5821	1507	6.73044	2268	5.87118	2560	6.6562	1903	7.62603	1776	5.31004	2052	4.3922	1012	7.79737	1117	5.63361	1099	6.85856	2146	5.58503	2060	6.34243	1760	0.95925	-0.0289702	normal	0.440253	-0.175962	normal	0.878321	-0.12093	normal	0.560972	-0.151152	normal	0.896173	0.0856349	normal	0.854869	-0.0540509	normal	[R]	General function prediction only	--	--	--	[S]
gene12196	LOC101108756	1.82976	156	1.47336	163	1.51948	195	1.42328	155	1.49852	129	1.63351	205	3.17896	187	1.58346	114	1.51633	113	1.91953	219	1.57234	165	1.07223	108	0.994183	-0.00879466	normal	0.452257	0.397062	normal	0.917114	-0.121841	normal	0.409392	0.425427	normal	0.936033	0.112855	normal	0.312797	0.517884	normal	[G]	Carbohydrate transport and metabolism	Cellular Component: integral component of membrane (GO:0016021);; Biological Process: transmembrane transport (GO:0055085);;	K08220|0|oas:101108756|K08220 MFS transporter, FLVCR family, feline leukemia virus subgroup C receptor-related protein | (RefSeq) FLVCR2; feline leukemia virus subgroup C receptor-related protein 2	--	[R]
gene18718	SSC5D	2.28868	318	0.981106	202	1.67792	326	1.07524	174	1.38511	196	1.12742	206	2.06873	183	1.5938	135	1.60221	152	1.28358	268	1.56111	232	1.11682	189	0.560341	-0.375487	normal	0.89953	-0.0949557	normal	0.765749	-0.297375	normal	0.427535	0.357179	normal	0.952666	-0.083471	normal	0.56254	0.266884	normal	--	--	--	--	--	--
gene23990	LOC101107914	0	0	0	0	0	0	0	0	0	0	0	0	0	0	0	0	0	0	0.012331	2	0	0	0	0	--	--	--	--	--	--	0.889302	0.0408127	normal	--	--	--	0.895549	-0.0483183	normal	0.780683	-0.0924657	normal	--	--	Molecular Function: G-protein coupled receptor activity (GO:0004930);; Molecular Function: olfactory receptor activity (GO:0004984);; Cellular Component: plasma membrane (GO:0005886);; Cellular Component: integral component of membrane (GO:0016021);;	K04257|0|oas:101107914|K04257 olfactory receptor | (RefSeq) olfactory receptor 8B3-like	Olfactory transduction (ko04740)	--
Ovis_aries_newGene_7013	--	0.100718	11	0.266545	31	0.107217	18	0.064648	9	0.031241	3	0.090114	14	0	0	0	0	0	0	0.636412	80	0.04785	7	0.048875	7	0.640648	-0.370541	normal	0.0212766	-1.23104	down	0.941141	0.0918488	normal	0.197748	-0.944138	normal	0.71007	-0.320814	normal	0.0886178	-0.889651	normal	--	--	--	--	--	--
gene8287	GCC1	4.30943	1196	1.91439	893	3.9442	1535	4.46168	1448	4.34558	1217	4.66259	1782	3.48842	714	3.46086	828	4.23319	848	3.88041	1674	3.27867	1103	3.15361	1162	0.476776	0.317355	normal	0.751873	0.150341	normal	0.986444	0.026004	normal	0.376968	-0.200741	normal	0.2515	0.304074	normal	0.740546	0.121499	normal	--	--	Biological Process: protein targeting to Golgi (GO:0000042);; Cellular Component: Golgi apparatus (GO:0005794);; Cellular Component: plasma membrane (GO:0005886);;	K20281|0|oas:101109438|K20281 GRIP and coiled-coil domain-containing protein 1 | (RefSeq) GCC1; GRIP and coiled-coil domain containing 1	--	--
gene13763	NEK3	1.98105	320	2.47376	434	2.22591	480	1.82477	354	2.75593	396	3.13969	571	2.7841	269	2.40132	283	4.08135	466	2.41016	560	2.81697	486	2.03914	356	0.813049	0.162087	normal	0.248636	0.456543	normal	0.891939	0.105818	normal	0.555392	0.299651	normal	0.972568	0.04767	normal	0.480171	0.342398	normal	[M]	Cell wall/membrane/envelope biogenesis	Molecular Function: protein serine/threonine kinase activity (GO:0004674);; Molecular Function: ATP binding (GO:0005524);;	K20873|0|chx:102191249|K20873 NIMA (never in mitosis gene a)-related kinase 3 [EC:2.7.11.1] | (RefSeq) NEK3; NIMA related kinase 3	--	[R]
Ovis_aries_newGene_40137	--	45.357	1496	48.1235	2021	27.9704	1421	30.7263	1232	39.3892	1307	42.3782	2014	28.0127	664	18.1122	443	84.7239	2048	34.4308	1703	59.6934	2464	27.2266	1091	0.932615	-0.071973	normal	0.949718	0.0650264	normal	0.999988	-6.11542e-05	normal	0.875077	0.143882	normal	0.967263	-0.0709725	normal	0.949218	0.0638349	normal	--	--	--	--	--	--
Ovis_aries_newGene_11200	--	0.817859	39	0.80062	35	0.4678	41	0.689411	38	0.285321	17	0.557504	37	0.263865	11	0.197238	9	0.796111	31	0.602842	42	0.705431	44	0.596224	28	0.886505	-0.158705	normal	0.780897	-0.25868	normal	0.976118	-0.0574356	normal	0.941663	-0.0990086	normal	0.959403	-0.101536	normal	0.844665	-0.190755	normal	--	--	--	--	--	--
gene20646	SMAD1	19.4774	2909	23.0118	3424	26.1037	4908	12.4427	3371	15.1403	2979	19.0017	4060	25.9171	2490	28.5327	3210	24.7218	2326	21.865	4791	22.1027	3863	21.4336	3735	0.985704	-0.0095213	normal	0.269201	0.295915	normal	0.889302	0.0882784	normal	0.196299	0.305496	normal	0.772849	-0.106396	normal	0.497918	0.203425	normal	--	--	Biological Process: MAPK cascade (GO:0000165);; Molecular Function: RNA polymerase II core promoter sequence-specific DNA binding (GO:0000979);; Biological Process: ureteric bud development (GO:0001657);; Biological Process: mesodermal cell fate commitment (GO:0001710);; Biological Process: osteoblast fate commitment (GO:0002051);; Molecular Function: transcription factor activity, sequence-speci…	K04676|0|tup:102492355|K04676 mothers against decapentaplegic homolog 1 | (RefSeq) SMAD1; SMAD family member 1	TGF-beta signaling pathway (ko04350);; Hippo signaling pathway (ko04390);; Signaling pathways regulating pluripotency of stem cells (ko04550);; Transcriptional misregulation in cancer (ko05202)	[TK]
gene6634	WIF1	6.88103	760	6.74053	955	5.14863	881	8.22394	1113	9.56831	1073	6.99573	1123	2.21469	178	5.07207	420	3.11036	255	7.25434	1211	7.3695	1027	8.6064	1164	0.228782	0.392118	normal	0.0724232	-0.739426	normal	0.524034	0.283064	normal	0.000772996	-1.19424	down	0.899555	0.102664	normal	0.0043515	-1.0224	down	--	--	Biological Process: positive regulation of fat cell differentiation (GO:0045600);;	K01691|0|phd:102331573|K01691 WNT inhibitory factor 1 | (RefSeq) WIF1; WNT inhibitory factor 1	Wnt signaling pathway (ko04310)	[TW]
gene27130	TOP2B	45.9891	14018	44.3773	17367	38.3033	20664	41.6872	15853	42.1667	14535	40.181	18271	42.2449	9329	39.6792	9020	36.4023	9114	45.5623	19730	43.2134	16754	39.9583	14788	0.994574	-0.00359062	normal	0.299924	-0.141469	normal	0.875872	-0.0819745	normal	0.402467	-0.14221	normal	0.895075	0.0715682	normal	0.750976	-0.0617625	normal	[L]	Replication, recombination and repair	Cellular Component: heterochromatin (GO:0000792);; Biological Process: neuron migration (GO:0001764);; Molecular Function: DNA binding (GO:0003677);; Molecular Function: chromatin binding (GO:0003682);; Molecular Function: DNA topoisomerase type II (ATP-hydrolyzing) activity (GO:0003918);; Molecular Function: protein kinase C binding (GO:0005080);; Molecular Function: ATP binding (GO:0005524);; C…	K03164|0|chx:102180187|K03164 DNA topoisomerase II [EC:5.99.1.3] | (RefSeq) TOP2B; topoisomerase (DNA) II beta	Platinum drug resistance (ko01524)	[B]
gene25196	DSG2	7.61895	1942	9.12412	2959	14.6796	6043	18.0641	5594	9.57102	2453	6.43838	2364	14.2024	2599	14.3743	2847	14.541	2715	15.174	6081	7.51843	2397	15.172	4693	0.938497	0.0881258	normal	0.339285	0.395937	normal	0.889302	0.18639	normal	0.677513	0.273825	normal	0.958245	-0.0981935	normal	0.796573	0.14477	normal	[S]	Function unknown	Molecular Function: calcium ion binding (GO:0005509);; Cellular Component: plasma membrane (GO:0005886);; Biological Process: homophilic cell adhesion via plasma membrane adhesion molecules (GO:0007156);; Cellular Component: integral component of membrane (GO:0016021);; Cellular Component: desmosome (GO:0030057);; Biological Process: ventricular cardiac muscle cell action potential (GO:0086005);;…	K07597|0|oas:101118655|K07597 desmoglein 2 | (RefSeq) DSG2; desmoglein 2	Arrhythmogenic right ventricular cardiomyopathy (ARVC) (ko05412)	[S]
gene5784	LHCGR	0.013731	3	0	0	0.044069	10	0.017059	4	0	0	0.014387	4	0	0	0	0	0.018858	3	0.064512	15	0.055071	11	0	0	0.947677	-0.042868	normal	0.866251	-0.099184	normal	0.928284	0.0667071	normal	0.934671	-0.0751928	normal	0.895075	-0.124647	normal	0.740546	-0.198961	normal	--	--	Biological Process: ovarian follicle development (GO:0001541);; Molecular Function: luteinizing hormone receptor activity (GO:0004964);; Cellular Component: integral component of plasma membrane (GO:0005887);; Biological Process: activation of adenylate cyclase activity (GO:0007190);; Biological Process: phospholipase C-activating G-protein coupled receptor signaling pathway (GO:0007200);; Biolog…	K04248|0|oas:101113228|K04248 luteinizing hormone/choriogonadotropin receptor | (RefSeq) LHCGR, LH/CG-R, LHR, LSH-R; luteinizing hormone/choriogonadotropin receptor	Calcium signaling pathway (ko04020);; Neuroactive ligand-receptor interaction (ko04080);; Ovarian steroidogenesis (ko04913);; Prolactin signaling pathway (ko04917)	[T]
Ovis_aries_newGene_37458	--	0.322858	47	0	0	0.189748	43	0.288713	51	0	0	0.985215	206	0	0	0.179497	20	0	0	0.847443	184	0	0	0.995226	175	0.903412	0.058896	normal	0.780897	-0.174872	normal	0.90324	0.0597187	normal	0.744232	-0.203962	normal	0.983061	-0.0196821	normal	0.760387	-0.12439	normal	--	--	Molecular Function: receptor binding (GO:0005102);; Cellular Component: peroxisome (GO:0005777);; Biological Process: putrescine biosynthetic process (GO:0009446);; Biological Process: putrescine catabolic process (GO:0009447);; Biological Process: spermidine catabolic process (GO:0046203);; Biological Process: spermine catabolic process (GO:0046208);; Molecular Function: polyamine oxidase activi…	--	--	--
gene20254	RGS7BP	2.69104	918	2.89401	1257	2.11893	1114	1.25976	523	2.62774	902	1.77917	876	2.24215	516	2.363	598	1.77164	443	1.71449	878	2.10455	899	1.50627	624	0.537158	-0.34852	normal	0.38658	-0.299677	normal	0.146282	-0.461884	normal	0.871727	0.0971557	normal	0.958715	0.0815154	normal	0.655534	0.198641	normal	--	--	Cellular Component: nucleus (GO:0005634);; Cellular Component: cytoplasm (GO:0005737);; Cellular Component: plasma membrane (GO:0005886);; Biological Process: G-protein coupled receptor signaling pathway (GO:0007186);; Biological Process: negative regulation of signal transduction (GO:0009968);;	--	--	--
gene24347	TM7SF2	27.1606	2836	29.5999	4011	35.3926	4889	37.5689	4096	26.3482	2806	38.0936	4972	22.8147	1805	19.5556	1540	24.489	1937	27.6047	4583	39.2701	4491	39.7689	4302	0.839625	0.0959567	normal	0.0686698	-0.34754	normal	0.780824	0.146823	normal	0.0461793	-0.452457	normal	0.956418	-0.0557688	normal	0.00952798	-0.4995	normal	[O]	Posttranslational modification, protein turnover, chaperones	Cellular Component: endoplasmic reticulum membrane (GO:0005789);; Biological Process: cholesterol biosynthetic process (GO:0006695);; Cellular Component: integral component of membrane (GO:0016021);; Molecular Function: delta14-sterol reductase activity (GO:0050613);; Biological Process: oxidation-reduction process (GO:0055114);;	K00222|0|chx:100861120|K00222 Delta14-sterol reductase [EC:1.3.1.70] | (RefSeq) TM7SF2; transmembrane 7 superfamily member 2	Steroid biosynthesis (ko00100)	[IT]
gene26186	VGF	0.008448	1	0	0	0	0	0	0	0.018339	2	0	0	0	0	0	0	0	0	0	0	0	0	0	0	0.956568	0.0194249	normal	--	--	--	--	--	--	0.732983	-0.18085	normal	0.895075	0.0531297	normal	--	--	--	--	--	Molecular Function: neuropeptide hormone activity (GO:0005184);; Cellular Component: extracellular region (GO:0005576);; Molecular Function: growth factor activity (GO:0008083);; Cellular Component: transport vesicle (GO:0030133);;	--	--	--
Ovis_aries_newGene_38622	--	164.415	4700	137.308	4997	162.383	7151	127.537	4431	115.631	3325	133.253	5490	166.414	3415	198.721	4210	219.03	4589	129.318	5545	151.286	5413	132.959	4615	0.344679	-0.256212	normal	0.200415	0.306742	normal	0.784039	-0.155014	normal	0.00353322	0.570347	normal	0.895075	-0.106454	normal	0.0208092	0.462558	normal	--	--	Molecular Function: cytochrome-c oxidase activity (GO:0004129);; Cellular Component: mitochondrial inner membrane (GO:0005743);; Cellular Component: integral component of membrane (GO:0016021);; Cellular Component: respiratory chain complex IV (GO:0045277);; Biological Process: hydrogen ion transmembrane transport (GO:1902600);;	K02268|1.12115e-47|cfr:102514870|K02268 cytochrome c oxidase subunit 6c | (RefSeq) cytochrome c oxidase subunit 6C	Oxidative phosphorylation (ko00190);; Cardiac muscle contraction (ko04260);; Non-alcoholic fatty liver disease (NAFLD) (ko04932);; Alzheimer's disease (ko05010);; Parkinson's disease (ko05012);; Huntington's disease (ko05016)	--
gene8957	TECR	67.1149	3275	62.3047	3870	64.4934	4848	82.9679	4920	69.3734	3405	79.4182	5585	84.4012	2957	66.35	2399	86.0185	3077	74.5239	5454	94.9438	5798	85.1642	5045	0.258434	0.275593	normal	0.227243	0.264653	normal	0.06844	0.371123	normal	0.958132	-0.022384	normal	0.895075	-0.103597	normal	0.740997	-0.121976	normal	--	--	Biological Process: steroid biosynthetic process (GO:0006694);; Molecular Function: oxidoreductase activity, acting on the CH-CH group of donors (GO:0016627);; Cellular Component: integral component of endoplasmic reticulum membrane (GO:0030176);; Biological Process: fatty acid elongation (GO:0030497);; Biological Process: very long-chain fatty acid biosynthetic process (GO:0042761);;	K10258|7.08082e-156|oas:101117331|K10258 very-long-chain enoyl-CoA reductase [EC:1.3.1.93] | (RefSeq) TECR; trans-2,3-enoyl-CoA reductase	Fatty acid elongation (ko00062);; Biosynthesis of unsaturated fatty acids (ko01040);; Fatty acid metabolism (ko01212)	[I]
gene9938	GPR151	0.178331	67	0.15313	74	0.233	135	0.212524	98	0.180045	69	0.194229	106	0.197928	54	0.206766	58	0.098466	28	0.186324	105	0.294029	139	0.173214	80	0.945734	0.0727875	normal	0.883528	-0.129765	normal	0.912299	0.140754	normal	0.761157	-0.232123	normal	0.961536	-0.0881859	normal	0.737701	-0.292787	normal	--	--	Molecular Function: G-protein coupled receptor activity (GO:0004930);; Cellular Component: integral component of membrane (GO:0016021);;	K08435|0|oas:101108132|K08435 G protein-coupled receptor 151 | (RefSeq) GPR151; G protein-coupled receptor 151	--	[R]
Ovis_aries_newGene_56025	--	1.13596	131	2.10894	310	0.523713	93	0.243796	35	1.8873	219	0.30067	50	0	0	0.075916	7	1.86722	158	0.129363	23	0.049719	8	0.813206	114	0.839625	-0.225664	normal	0.83794	-0.151715	normal	0.401942	-0.457463	normal	0.949982	-0.0764685	normal	0.806544	0.28878	normal	0.797524	0.197368	normal	--	--	Biological Process: negative regulation of transcription from RNA polymerase II promoter (GO:0000122);; Cellular Component: Ada2/Gcn5/Ada3 transcription activator complex (GO:0005671);; Molecular Function: TBP-class protein binding (GO:0017025);; Biological Process: histone H3 acetylation (GO:0043966);; Cellular Component: mitotic spindle (GO:0072686);;	--	--	--
gene8331	COPG2	15.555	2417	15.8227	3126	17.1354	3862	20.4726	3480	15.7498	2458	16.4524	3679	12.8496	1435	13.964	1610	16.6611	1895	16.0565	3737	19.4244	3491	16.8658	3179	0.813049	0.117842	normal	0.645331	-0.138657	normal	0.876167	0.0959998	normal	0.316534	-0.264965	normal	0.98733	0.0161112	normal	0.336494	-0.238501	normal	--	--	Molecular Function: structural molecule activity (GO:0005198);; Biological Process: intracellular protein transport (GO:0006886);; Biological Process: vesicle-mediated transport (GO:0016192);; Cellular Component: COPI vesicle coat (GO:0030126);;	K17267|0|oas:101117839|K17267 coatomer subunit gamma | (RefSeq) COPG2; coatomer protein complex subunit gamma 2	--	[U]
gene8695	RUFY1	9.1302	1370	10.8611	1883	13.3503	2919	7.49372	1388	9.91253	1515	10.445	2279	10.9302	1108	9.19215	1018	10.7319	1234	10.0947	2252	11.2043	2075	8.77328	1579	0.839625	-0.12674	normal	0.894717	-0.0577161	normal	0.928218	-0.0795805	normal	0.842	0.0736404	normal	0.962811	-0.0528956	normal	0.951035	0.0242388	normal	--	--	Cellular Component: cytoplasm (GO:0005737);; Molecular Function: zinc ion binding (GO:0008270);; Molecular Function: protein transporter activity (GO:0008565);; Biological Process: regulation of endocytosis (GO:0030100);;	K12482|0|oas:101122780|K12482 RUN and FYVE domain-containing protein 1 | (RefSeq) RUFY1; RUN and FYVE domain containing 1	Endocytosis (ko04144)	[R]
gene9919	NR3C1	17.8715	5734	18.4015	7493	19.5125	9675	14.7824	5730	16.3782	5279	15.9694	7375	17.1561	3910	23.8302	4433	26.8	5077	13.9741	6658	17.8254	7151	19.6473	6222	0.18999	-0.213734	normal	0.953953	0.0206585	normal	0.563626	-0.212658	normal	0.265952	0.232079	normal	0.999368	0.000765228	normal	0.4061	0.235063	normal	--	--	Molecular Function: transcription factor activity, sequence-specific DNA binding (GO:0003700);; Molecular Function: glucocorticoid receptor activity (GO:0004883);; Molecular Function: steroid binding (GO:0005496);; Cellular Component: nucleus (GO:0005634);; Cellular Component: mitochondrion (GO:0005739);; Cellular Component: cytosol (GO:0005829);; Biological Process: regulation of gluconeogenesis…	K05771|0|chx:102189859|K05771 glucocorticoid receptor | (RefSeq) NR3C1; nuclear receptor subfamily 3 group C member 1	Neuroactive ligand-receptor interaction (ko04080)	[T]
Ovis_aries_newGene_21224	--	0.178979	3	0.080472	2	0.04006	2	0	0	0	0	0	0	0	0	0.499678	7	0.080269	1	0	0	0	0	0.151803	4	0.733859	-0.145405	normal	0.843753	0.150078	normal	0.958104	-0.0389344	normal	0.616112	0.338755	normal	0.895075	-0.0574399	normal	0.814999	0.118112	normal	--	--	--	--	--	--
gene8572	LRRC61	5.45214	547	9.73967	1374	8.65897	1196	11.7768	1404	9.47695	876	10.0159	1351	3.22351	291	4.16366	323	5.06211	361	8.52839	1355	7.62656	989	7.84281	995	0.699887	0.276571	normal	0.0206355	-0.780771	normal	0.971058	0.0527803	normal	3.34755e-07	-1.16606	down	0.663094	0.240904	normal	4.10164e-07	-0.901514	normal	--	--	--	--	--	[T]
Ovis_aries_newGene_67745	--	0	0	0	0	0.23567	45	0	0	0	0	0	0	0	0	0	0	0	0	0	0	0	0	0	0	0.785135	-0.115736	normal	0.6922	-0.188442	normal	0.876779	-0.0898292	normal	--	--	--	--	--	--	--	--	--	--	--	--	--	--	[R]
gene6703	INHBC	0	0	0.02818	7	0	0	0	0	0	0	0	0	0	0	0	0	0	0	0	0	0	0	0	0	0.839625	-0.0641689	normal	0.741778	-0.131799	normal	0.889302	-0.0510913	normal	--	--	--	--	--	--	--	--	--	--	--	Molecular Function: hormone activity (GO:0005179);; Cellular Component: extracellular region (GO:0005576);; Molecular Function: growth factor activity (GO:0008083);; Biological Process: growth (GO:0040007);;	K04667|0|oas:101121843|K04667 inhibin, beta | (RefSeq) INHBC; inhibin beta C subunit	TGF-beta signaling pathway (ko04350);; Signaling pathways regulating pluripotency of stem cells (ko04550)	[T]
gene18306	ZNF428	3.95959	347	5.20548	532	3.5595	616	5.98788	600	4.4234	418	5.27759	724	3.63277	251	3.77463	279	5.90483	338	5.00913	768	4.01631	487	7.08305	622	0.465493	0.282343	normal	0.984043	0.0109084	normal	0.671443	0.247343	normal	0.416239	-0.292302	normal	0.988638	0.020618	normal	0.538187	-0.255511	normal	--	--	Molecular Function: metal ion binding (GO:0046872);;	--	--	--
Ovis_aries_newGene_12798	--	0.136404	22	0.747638	222	0.648232	229	0.513652	156	0.030852	8	0.128997	47	0.772534	138	0.608117	112	0.727182	133	0.482321	119	0.334836	105	0.238612	72	0.794796	-0.262933	normal	0.698051	0.371943	normal	0.888632	-0.242858	normal	0.197521	1.01631	normal	0.952666	-0.109393	normal	0.000660095	1.08739	up	--	--	Biological Process: nucleotide-excision repair, DNA damage recognition (GO:0000715);; Biological Process: positive regulation of cytokine-mediated signaling pathway (GO:0001961);; Molecular Function: damaged DNA binding (GO:0003684);; Molecular Function: single-stranded DNA binding (GO:0003697);; Molecular Function: ion channel activity (GO:0005216);; Molecular Function: calcium ion binding (GO:0…	--	--	--
gene17061	TFAP2C	15.1473	1610	15.2062	2058	14.4794	2371	15.7722	2037	15.6923	1678	14.1914	2174	15.9742	1219	17.8293	1404	17.4695	1361	14.1643	2258	14.4699	1925	14.8699	1919	0.901191	0.0540982	normal	0.372538	0.175871	normal	0.941141	-0.0405425	normal	0.671926	0.116219	normal	0.895075	0.087508	normal	0.267137	0.212346	normal	--	--	Molecular Function: RNA polymerase II distal enhancer sequence-specific DNA binding (GO:0000980);; Molecular Function: transcriptional activator activity, RNA polymerase II core promoter proximal region sequence-specific binding (GO:0001077);; Molecular Function: transcriptional repressor activity, RNA polymerase II core promoter proximal region sequence-specific binding (GO:0001078);; Biological…	K09177|0|oas:101104925|K09177 transcription factor AP-2 gamma | (RefSeq) TFAP2C; transcription factor AP-2 gamma	--	[K]
gene15709	LOC101116750	16.2916	1767	16.4018	2172	12.8351	2616	13.2135	1808	14.5793	1702	10.1849	1586	16.8876	1230	13.644	1017	12.6599	943	8.93686	1355	11.914	1565	11.4168	1448	0.649369	-0.223429	normal	0.325592	-0.249698	normal	0.00779406	-0.568874	normal	0.976515	-0.0156645	normal	0.539425	0.325218	normal	0.283611	0.343221	normal	[P]	Inorganic ion transport and metabolism	Molecular Function: calcium-transporting ATPase activity (GO:0005388);; Molecular Function: ATP binding (GO:0005524);; Cellular Component: integral component of membrane (GO:0016021);; Molecular Function: metal ion binding (GO:0046872);;	K05850|0|oas:101116750|K05850 Ca2+ transporting ATPase, plasma membrane [EC:3.6.3.8] | (RefSeq) plasma membrane calcium-transporting ATPase 4-like	Calcium signaling pathway (ko04020);; cGMP-PKG signaling pathway (ko04022);; cAMP signaling pathway (ko04024);; Adrenergic signaling in cardiomyocytes (ko04261);; Salivary secretion (ko04970);; Pancreatic secretion (ko04972)	[P]
gene28409	LOC101103382	0	0	0	0	0	0	0	0	0	0	0	0	0	0	0	0	0	0	0	0	0	0	0	0	--	--	--	--	--	--	--	--	--	--	--	--	--	--	--	--	--	--	--	--	Molecular Function: G-protein coupled receptor activity (GO:0004930);; Molecular Function: olfactory receptor activity (GO:0004984);; Cellular Component: plasma membrane (GO:0005886);; Biological Process: G-protein coupled receptor signaling pathway (GO:0007186);; Cellular Component: integral component of membrane (GO:0016021);; Biological Process: detection of chemical stimulus involved in senso…	K04257|0|oas:101103382|K04257 olfactory receptor | (RefSeq) olfactory receptor 6C65-like	Olfactory transduction (ko04740)	--
Ovis_aries_newGene_7840	--	0.749987	12	0	0	0	0	0	0	0	0	0	0	0	0	0	0	0	0	0.23471	6	0	0	0	0	0.839625	-0.070602	normal	0.739708	-0.141937	normal	0.941835	-0.0341021	normal	--	--	--	0.895075	-0.0588487	normal	0.748521	-0.120666	normal	--	--	--	--	--	--
Ovis_aries_newGene_55828	--	0.053052	10	0.053451	12	0.126477	34	0.116502	25	0.20503	36	0.073812	19	0.069494	9	0.323785	41	0.214632	27	0.169121	44	0.153344	33	0.173074	36	0.78343	0.294895	normal	0.341817	0.698593	normal	0.558158	0.441187	normal	0.710119	0.378193	normal	0.931131	-0.148285	normal	0.864902	0.169484	normal	--	--	Biological Process: positive regulation of cytokine-mediated signaling pathway (GO:0001961);; Molecular Function: DNA binding (GO:0003677);; Biological Process: nucleotide-excision repair (GO:0006289);; Biological Process: regulation of transcription, DNA-templated (GO:0006355);; Biological Process: polyamine biosynthetic process (GO:0006596);; Biological Process: polyamine catabolic process (GO:…	K10838|5.12374e-10|oas:101109650|K10838 xeroderma pigmentosum group C-complementing protein | (RefSeq) XPC; XPC complex subunit, DNA damage recognition and repair factor	Nucleotide excision repair (ko03420)	--
Ovis_aries_newGene_30156	--	0.496117	31	0.286599	24	0.569685	31	0.353165	21	0.448341	28	0.89811	76	0.138085	6	0	0	0.074605	5	0.271653	26	0.363026	28	0.032387	3	0.839625	0.244987	normal	0.184725	-0.867631	normal	0.889302	-0.19978	normal	0.0645376	-1.39772	normal	0.699329	0.369561	normal	0.644293	-0.383611	normal	--	--	--	K05505|6.4906e-09|chx:102182683|K05505 C-X-C motif chemokine 1/2/3 | (RefSeq) growth-regulated alpha protein-like	Chemokine signaling pathway (ko04062);; TNF signaling pathway (ko04668);; Salmonella infection (ko05132);; Legionellosis (ko05134)	--
gene26208	GNB2	74.8889	5372	73.5777	6720	66.1024	7306	70.6049	6156	72.7275	5248	75.3321	7789	48.3323	2490	44.3639	2359	58.3779	3070	73.9107	7953	67.5506	6065	84.0353	7320	0.887649	0.0551595	normal	0.00566258	-0.506957	normal	0.915004	0.0692264	normal	0.00100216	-0.573166	normal	0.981951	-0.0225494	normal	0.00493842	-0.57773	normal	[R]	General function prediction only	Molecular Function: GTPase activity (GO:0003924);; Molecular Function: signal transducer activity (GO:0004871);; Cellular Component: heterotrimeric G-protein complex (GO:0005834);; Biological Process: obsolete GTP catabolic process (GO:0006184);; Cellular Component: perinuclear region of cytoplasm (GO:0048471);; Molecular Function: GTPase binding (GO:0051020);;	K04537|0|oas:101102864|K04537 guanine nucleotide-binding protein G(I)/G(S)/G(T) subunit beta-2 | (RefSeq) GNB2; G protein subunit beta 2	Ras signaling pathway (ko04014);; Chemokine signaling pathway (ko04062);; PI3K-Akt signaling pathway (ko04151);; Circadian entrainment (ko04713);; Retrograde endocannabinoid signaling (ko04723);; Glutamatergic synapse (ko04724);; Cholinergic synapse (ko04725);; Serotonergic synapse (ko04726);; GABAergic synapse (ko04727);; Dopaminergic synapse (ko04728);; Morphine addiction (ko05032);; Alcoholism…	[R]
Ovis_aries_newGene_57211	--	1.69138	80	1.44395	88	1.15726	74	0.588188	31	0.87491	43	0.684399	46	2.05985	72	3.15635	66	0.608857	22	1.20783	90	0.926958	54	1.14135	64	0.223441	-0.625778	normal	0.92226	0.099859	normal	0.889302	-0.218706	normal	0.226658	0.849897	normal	0.632942	-0.412984	normal	0.723159	0.329895	normal	--	--	--	--	--	--
Ovis_aries_newGene_7522	--	0	0	0.350021	6	0.034304	1	0	0	0	0	0	0	0.069318	1	0	0	0	0	0.158729	4	0	0	0	0	0.839625	-0.074255	normal	0.822227	-0.10874	normal	0.961813	-0.0281066	normal	--	--	--	0.895075	-0.055736	normal	0.931026	-0.0389709	normal	--	--	--	--	--	--
Ovis_aries_newGene_251	--	2.12878	343	1.70205	435	1.37658	409	1.9024	408	2.34337	347	1.0464	285	0.444088	66	0.593118	77	0.877706	114	1.21263	355	1.1577	271	0.75129	163	0.944709	-0.0683204	normal	4.35046e-05	-1.2931	down	0.186342	-0.540757	normal	0.00173193	-1.24105	down	0.478563	0.452195	normal	0.176264	-0.639643	normal	--	--	--	--	--	--
gene28935	LOC101104725	34.8642	1678	34.3688	2099	40.2055	2980	45.6217	2668	40.5231	1959	43.6731	3024	33.5294	1158	31.5341	1125	37.7674	1332	42.8024	3083	41.1363	2474	44.5123	2594	0.313149	0.26362	normal	0.740203	-0.101574	normal	0.428994	0.219253	normal	0.0552186	-0.380473	normal	0.965086	0.0387115	normal	0.0626209	-0.331675	normal	[J]	Translation, ribosomal structure and biogenesis	--	K02892|5.69267e-113|oas:101104725|K02892 large subunit ribosomal protein L23 | (RefSeq) MRPL23; 39S ribosomal protein L23, mitochondrial	Ribosome (ko03010)	[J]
Ovis_aries_newGene_18692	--	0	0	0.041279	2	0	0	0	0	0	0	0	0	0	0	0	0	0	0	0.518122	15	0	0	0	0	0.840366	-0.0528661	normal	0.776167	-0.100942	normal	0.902929	0.0475919	normal	--	--	--	0.895075	-0.0631896	normal	0.740997	-0.134307	normal	--	--	--	--	--	[R]
Ovis_aries_newGene_38674	--	1.68414	128	0.471936	46	1.37976	161	1.14273	105	2.16822	165	2.17804	238	1.64276	90	1.6544	93	0.491651	28	1.71444	195	1.59847	152	1.34039	124	0.678213	0.370708	normal	0.958821	0.059766	normal	0.889302	0.215909	normal	0.58471	-0.458357	normal	0.895075	0.185107	normal	0.779856	-0.227389	normal	--	--	--	--	--	--
gene4248	GLI2	6.99106	2473	5.86751	2651	6.53342	3520	6.72275	2741	8.20756	2498	6.33933	2993	4.9955	1273	3.70556	975	5.856	1159	6.21195	3257	5.73427	2432	5.68415	2449	0.967038	0.0220484	normal	0.00584072	-0.547694	normal	0.750708	-0.148829	normal	0.00331566	-0.581291	normal	0.675143	0.165468	normal	0.0558818	-0.40088	normal	[R]	General function prediction only	Biological Process: negative regulation of transcription from RNA polymerase II promoter (GO:0000122);; Biological Process: in utero embryonic development (GO:0001701);; Biological Process: kidney development (GO:0001822);; Biological Process: osteoblast development (GO:0002076);; Molecular Function: chromatin binding (GO:0003682);; Molecular Function: transcription factor activity, sequence-spec…	K16798|0|oas:101114169|K16798 zinc finger protein GLI2 | (RefSeq) GLI2; GLI family zinc finger 2	Hedgehog signaling pathway (ko04340);; Hippo signaling pathway (ko04390);; Pathways in cancer (ko05200);; Basal cell carcinoma (ko05217)	[R]
Ovis_aries_newGene_30026	--	0	0	0.050968	2	0.231664	6	0.053389	2	0	0	0	0	0	0	0	0	0	0	0	0	0	0	0.078158	2	0.896176	-0.0561006	normal	0.741778	-0.132141	normal	0.920722	-0.0476783	normal	0.736894	-0.176159	normal	0.998606	0.0012041	normal	0.773757	-0.0983034	normal	--	--	Molecular Function: nucleic acid binding (GO:0003676);; Molecular Function: RNA-directed DNA polymerase activity (GO:0003964);; Cellular Component: intracellular (GO:0005622);; Cellular Component: fascia adherens (GO:0005916);; Biological Process: RNA-dependent DNA biosynthetic process (GO:0006278);; Biological Process: regulation of transcription, DNA-templated (GO:0006355);; Molecular Function:…	K09228|5.28277e-44|bta:100138479|K09228 KRAB domain-containing zinc finger protein | (RefSeq) zinc finger protein 510	--	--
gene1708	LOC101115597	0.611354	20	0.392497	17	5.43814	274	10.5883	420	9.97717	328	21.8073	1026	0.920878	22	4.75255	115	14.4394	346	1.12708	56	12.3228	504	2.17936	87	0.270974	0.509269	normal	0.40057	0.631309	normal	0.889302	0.151778	normal	0.342255	-0.788273	normal	0.717195	0.335012	normal	0.921218	0.102254	normal	--	--	Cellular Component: intermediate filament (GO:0005882);;	--	--	--
gene17129	POFUT1	8.35116	2081	7.61014	2431	7.26364	2811	8.06806	2451	10.2193	2547	8.42792	3050	6.96723	1261	7.2355	1341	8.22578	1519	7.80649	2942	7.25702	2281	6.48307	1978	0.458572	0.212622	normal	0.850626	-0.0581624	normal	0.889302	-0.0967475	normal	0.176325	-0.28209	normal	0.22901	0.30209	normal	0.914057	0.0382838	normal	--	--	Biological Process: angiogenesis (GO:0001525);; Biological Process: somitogenesis (GO:0001756);; Biological Process: Notch signaling pathway (GO:0007219);; Biological Process: nervous system development (GO:0007399);; Biological Process: heart development (GO:0007507);; Molecular Function: fucosyltransferase activity (GO:0008417);; Cellular Component: membrane (GO:0016020);; Biological Process: p…	K03691|0|oas:101104000|K03691 peptide-O-fucosyltransferase [EC:2.4.1.221] | (RefSeq) POFUT1; protein O-fucosyltransferase 1	Other types of O-glycan biosynthesis (ko00514)	[O]
gene9435	SNX24	1.83925	509	2.62955	761	2.66892	1022	2.08111	661	1.76763	462	1.5645	580	2.66783	565	3.12884	677	2.40295	494	2.42826	941	2.3304	706	1.91348	620	0.583118	-0.268236	normal	0.187372	0.38804	normal	0.958975	-0.0517505	normal	0.0132048	0.677467	normal	0.757296	-0.225426	normal	0.0920685	0.439544	normal	--	--	Biological Process: cell communication (GO:0007154);; Biological Process: protein transport (GO:0015031);; Cellular Component: cytoplasmic vesicle membrane (GO:0030659);; Molecular Function: phosphatidylinositol binding (GO:0035091);;	K17941|1.30142e-149|oas:101103475|K17941 sorting nexin-22/24 | (RefSeq) SNX24; sorting nexin 24	--	[ZUD]
gene10556	SEL1L3	2.05085	444	2.71587	692	3.07718	918	5.71093	1508	3.96481	866	3.47421	1087	0.731622	115	1.06196	172	1.80775	287	2.66979	869	2.78564	751	2.97216	781	0.012703	0.749175	normal	0.0295155	-0.882224	normal	0.812305	0.183135	normal	4.3106e-06	-1.73687	down	0.0902633	0.577059	normal	0.00406365	-1.06629	down	[T]	Signal transduction mechanisms	--	--	--	[MOT]
gene2530	SPSB4	0.426038	93	0.452626	126	0.60318	203	0.251574	67	0.173769	39	0.229996	73	0.533094	84	0.295272	48	0.552502	89	0.216056	71	0.136978	38	0.628337	167	0.0258394	-0.837936	normal	0.90763	-0.0958725	normal	0.876551	-0.261099	normal	0.102025	0.872529	normal	0.895075	-0.251019	normal	0.74952	0.289982	normal	--	--	Biological Process: protein ubiquitination (GO:0016567);; Biological Process: intracellular signal transduction (GO:0035556);;	K10343|0|oas:101108882|K10343 SPRY domain-containing SOCS box protein 1/4 | (RefSeq) SPSB4; splA/ryanodine receptor domain and SOCS box containing 4	--	[R]
Ovis_aries_newGene_10470	--	0.361879	45	0.143614	43	0.307939	110	0.251666	71	0.235762	55	0.289453	96	0.180288	30	0.199958	35	0.035795	7	0.279224	97	0.754804	126	0.280451	68	0.842559	0.186384	normal	0.709359	-0.368063	normal	0.801289	0.315252	normal	0.413831	-0.680532	normal	0.895075	-0.190376	normal	0.279406	-0.73014	normal	--	--	--	--	--	--
gene17764	CIAPIN1	12.1378	1405	12.1423	1764	6.91669	1257	10.1327	1324	15.0229	1615	12.7367	2166	10.2698	781	6.71088	591	8.3107	759	12.2694	2152	12.7321	1729	14.8366	1951	0.812146	0.204921	normal	0.539045	-0.293725	normal	0.777483	0.247343	normal	0.0375347	-0.548486	normal	0.962127	-0.0547223	normal	0.00646405	-0.595389	normal	--	--	Cellular Component: nucleolus (GO:0005730);; Cellular Component: cytoplasm (GO:0005737);; Biological Process: iron-sulfur cluster assembly (GO:0016226);; Biological Process: hemopoiesis (GO:0030097);; Biological Process: negative regulation of apoptotic process (GO:0043066);; Molecular Function: iron-sulfur cluster binding (GO:0051536);;	--	--	[S]
Ovis_aries_newGene_62595	--	0	0	0.487264	44	0.912837	100	0.628004	54	0.447788	32	0.463412	48	0	0	0.385077	21	0	0	0.516228	55	3.32871	295	0.758067	66	0.971677	0.0360175	normal	0.740203	-0.220936	normal	0.889302	0.132695	normal	0.477834	-0.67685	normal	0.320112	-0.600056	normal	0.56747	-0.32598	normal	--	--	--	K14165|7.22764e-13|phd:102341005|K14165 atypical dual specificity phosphatase [EC:3.1.3.16 3.1.3.48] | (RefSeq) DUSP22; dual specificity phosphatase 22	--	--
gene14935	SNX11	2.5698	1097	2.81624	1525	2.51915	1652	2.23184	1157	2.36813	1016	2.50271	1534	2.53483	776	2.10295	666	2.35008	736	2.81252	1800	2.3991	1282	2.41975	1252	0.784025	-0.119288	normal	0.460638	-0.185574	normal	0.952661	-0.0448434	normal	0.821541	-0.0689842	normal	0.899902	-0.0794253	normal	0.658143	-0.142345	normal	--	--	Cellular Component: endosome (GO:0005768);; Biological Process: cell communication (GO:0007154);; Biological Process: protein transport (GO:0015031);; Cellular Component: membrane (GO:0016020);; Biological Process: vesicle organization (GO:0016050);; Molecular Function: phosphatidylinositol phosphate binding (GO:1901981);;	K17924|3.89785e-152|chx:102169901|K17924 sorting nexin-10/11 | (RefSeq) SNX11; sorting nexin 11	--	[U]
gene25570	HS3ST6	5.83337	944	9.80171	911	4.50083	1199	5.37437	779	3.4186	400	2.98413	527	3.40083	186	2.31059	250	3.83432	466	5.01058	910	5.11515	1061	6.06312	599	0.0884467	-0.620547	normal	0.0336135	-0.859698	normal	0.745328	-0.266075	normal	0.750938	-0.220403	normal	0.689918	-0.340859	normal	0.274883	-0.56553	normal	[R]	General function prediction only	Molecular Function: [heparan sulfate]-glucosamine 3-sulfotransferase 1 activity (GO:0008467);;	K09679|6.3344e-173|oas:105604608|K09679 [heparan sulfate]-glucosamine 3-sulfotransferase 6 [EC:2.8.2.-] | (RefSeq) HS3ST6; heparan sulfate-glucosamine 3-sulfotransferase 6	--	[O]
Ovis_aries_newGene_59777	--	0.145539	4	0.609658	17	0	0	0.199568	6	0.046618	1	0.067322	3	0	0	0.321203	5	0	0	0.355358	12	0.268988	7	0	0	0.868466	-0.106519	normal	0.835743	-0.124612	normal	0.981195	-0.0235571	normal	0.958946	-0.0568239	normal	0.951632	-0.0741502	normal	0.883396	-0.0898419	normal	--	--	Molecular Function: nucleic acid binding (GO:0003676);; Molecular Function: RNA-directed DNA polymerase activity (GO:0003964);; Molecular Function: phospholipid binding (GO:0005543);; Cellular Component: intracellular (GO:0005622);; Cellular Component: fascia adherens (GO:0005916);; Biological Process: RNA-dependent DNA biosynthetic process (GO:0006278);; Biological Process: regulation of transcr…	--	--	--
gene19726	MPPED2	1.02648	143	0.903347	116	1.7992	306	0.651886	91	0.765033	93	0.989818	159	0.808905	79	0.820558	65	1.14577	115	1.28579	204	1.53882	218	1.17297	203	0.497898	-0.434587	normal	0.742846	-0.246245	normal	0.948542	0.0978688	normal	0.69389	0.272576	normal	0.120301	-0.613966	normal	0.474718	-0.390312	normal	[R]	General function prediction only	Molecular Function: hydrolase activity (GO:0016787);;	--	--	[R]
Ovis_aries_newGene_33008	--	0.36363	5	0	0	0	0	0	0	0	0	0	0	0.221168	2	0	0	0	0	0	0	0	0	0	0	0.839625	-0.0634941	normal	0.936765	-0.0385399	normal	0.889302	-0.0505989	normal	0.696	0.214363	normal	--	--	--	0.740997	0.122529	normal	--	--	--	--	--	--
gene125	HMGB4	0	0	0	0	0	0	0	0	0	0	0	0	0	0	0	0	0	0	0	0	0	0	0	0	--	--	--	--	--	--	--	--	--	--	--	--	--	--	--	--	--	--	--	--	Molecular Function: DNA binding (GO:0003677);; Cellular Component: nucleus (GO:0005634);; Cellular Component: chromosome (GO:0005694);;	K11297|0|oas:101106375|K11297 high mobility group protein B4 | (RefSeq) HMGB4; high mobility group box 4	--	[R]
gene14820	TOP3A	13.5089	2580	15.0323	3691	12.8858	4128	10.5882	2825	13.0717	2696	13.3428	3900	13.2919	1751	11.2468	1642	13.401	1697	12.2962	3926	11.4713	3084	11.0859	3062	0.903071	-0.0518745	normal	0.137161	-0.23894	normal	0.86784	-0.0972716	normal	0.310273	-0.191209	normal	0.956382	0.0388597	normal	0.436181	-0.144303	normal	[L]	Replication, recombination and repair	Molecular Function: DNA binding (GO:0003677);; Molecular Function: DNA topoisomerase type I activity (GO:0003917);; Cellular Component: chromosome (GO:0005694);; Biological Process: DNA topological change (GO:0006265);; Molecular Function: zinc ion binding (GO:0008270);; Cellular Component: PML body (GO:0016605);;	K03165|0|oas:101120422|K03165 DNA topoisomerase III [EC:5.99.1.2] | (RefSeq) TOP3A; topoisomerase (DNA) III alpha	Homologous recombination (ko03440);; Fanconi anemia pathway (ko03460)	[L]
gene24056	HEPACAM	0.18807	22	0.255177	36	0.222296	39	0.223016	31	0.330337	31	0.393489	62	0.290757	24	0.331878	26	0.132441	11	0.238657	41	0.157141	23	0.163246	23	0.838573	0.252845	normal	0.936222	0.0865025	normal	0.938187	-0.118123	normal	0.820011	-0.228035	normal	0.771707	0.357453	normal	0.80459	0.223448	normal	--	--	Cellular Component: cytoplasm (GO:0005737);; Cellular Component: cell-cell junction (GO:0005911);; Biological Process: cell cycle arrest (GO:0007050);; Biological Process: cell adhesion (GO:0007155);; Cellular Component: integral component of membrane (GO:0016021);; Cellular Component: axon (GO:0030424);; Biological Process: cellular protein localization (GO:0034613);; Biological Process: regulat…	--	--	--
gene19667	KLHL35	0	0	0	0	0	0	0	0	0.005596	2	0	0	0	0	0	0	0	0	0.006235	3	0.014943	5	0	0	0.839625	0.0556421	normal	--	--	--	0.889302	0.0712829	normal	0.732983	-0.18085	normal	0.932286	-0.0547387	normal	0.740997	-0.134703	normal	[M]	Cell wall/membrane/envelope biogenesis	--	K10461|0|oas:101106624|K10461 kelch-like protein 24/35 | (RefSeq) KLHL35; kelch like family member 35	--	[TR]
gene17111	ID1	41.745	1929	40.5713	2387	47.4326	3376	42.8179	2404	39.2776	1826	42.564	2834	32.7122	1085	36.0709	1235	59.2431	2006	47.8937	3319	58.1365	3362	56.8476	3189	0.962676	-0.0253273	normal	0.959617	-0.0327482	normal	0.235982	0.307708	normal	0.9831	-0.0132113	normal	0.170858	-0.341802	normal	0.425771	-0.338843	normal	--	--	Biological Process: negative regulation of transcription from RNA polymerase II promoter (GO:0000122);; Biological Process: endothelial cell morphogenesis (GO:0001886);; Molecular Function: transcription factor activity, sequence-specific DNA binding (GO:0003700);; Cellular Component: nucleus (GO:0005634);; Cellular Component: cytoplasm (GO:0005737);; Biological Process: apoptotic process (GO:000…	K04680|9.75579e-109|oas:101111650|K04680 DNA-binding protein inhibitor ID1 | (RefSeq) ID1; inhibitor of DNA binding 1, HLH protein	Rap1 signaling pathway (ko04015);; TGF-beta signaling pathway (ko04350);; Hippo signaling pathway (ko04390);; Signaling pathways regulating pluripotency of stem cells (ko04550)	--
gene22267	BHLHE40	13.0954	2359	15.2432	3292	13.4393	3696	15.0041	3111	13.127	2359	12.4388	3177	11.7366	1702	18.4578	2534	14.1938	2037	12.0968	3213	11.7595	2683	12.7934	2793	0.979049	-0.014715	normal	0.559113	0.200755	normal	0.640197	-0.150111	normal	0.528246	0.213026	normal	0.862771	0.126696	normal	0.200702	0.344465	normal	--	--	Biological Process: negative regulation of transcription from RNA polymerase II promoter (GO:0000122);; Molecular Function: transcriptional repressor activity, RNA polymerase II core promoter proximal region sequence-specific binding (GO:0001078);; Molecular Function: RNA polymerase II activating transcription factor binding (GO:0001102);; Molecular Function: transcriptional repressor activity, R…	K03729|0|oas:100169939|K03729 class B basic helix-loop-helix protein 2 | (RefSeq) BHLHE40, BHLHB2; basic helix-loop-helix family member e40	Circadian rhythm (ko04710)	[K]
Ovis_aries_newGene_31046	--	0.13765	5	0.772816	22	0.209817	14	0.383325	13	0.184026	9	0.235103	15	0	0	0	0	0.305355	10	0.019759	2	0	0	0	0	0.994183	-0.0117078	normal	0.764841	-0.218204	normal	0.289239	-0.400845	normal	0.736148	-0.332238	normal	0.21239	0.523262	normal	0.750976	0.136327	normal	--	--	--	--	--	--
gene27587	WDR45	23.3931	2022	26.0389	2847	27.2343	3601	25.8589	2613	19.7419	1659	27.5223	3404	24.4211	1531	23.9108	1491	25.7664	1603	27.3318	3458	26.3286	2792	26.576	2695	0.932498	-0.0586987	normal	0.765015	-0.0734417	normal	0.958322	0.0338489	normal	0.974446	-0.015151	normal	0.912386	-0.0972882	normal	0.57949	-0.11277	normal	--	--	Biological Process: autophagosome assembly (GO:0000045);; Cellular Component: cytoplasm (GO:0005737);; Molecular Function: phosphatidylinositol-3-phosphate binding (GO:0032266);; Molecular Function: phosphatidylinositol-3,5-bisphosphate binding (GO:0080025);;	--	--	[S]
Ovis_aries_newGene_33954	--	0.024462	3	0.201173	22	0.228427	29	0.107049	9	0.454122	26	0.112355	14	0	0	0.078794	5	0.114925	7	0.219933	29	0.156122	17	0.107626	11	0.975289	0.035256	normal	0.693813	-0.350971	normal	0.989725	0.0238861	normal	0.578799	-0.590623	normal	0.998181	0.00831517	normal	0.598677	-0.442176	normal	--	--	Molecular Function: RNA-directed DNA polymerase activity (GO:0003964);; Biological Process: RNA-dependent DNA biosynthetic process (GO:0006278);; Cellular Component: integral component of membrane (GO:0016021);;	--	--	--
Ovis_aries_newGene_37984	--	0.088307	8	0.053162	7	0	0	0.054706	6	0	0	0.031309	5	0.157128	11	0.24325	17	0.243572	16	0.059066	8	0.393136	44	0.260129	29	0.943157	-0.0487497	normal	0.316058	0.685405	normal	0.601498	0.301047	normal	0.092412	1.30418	normal	0.32976	-0.486765	normal	0.958396	-0.0573643	normal	--	--	--	K14211|9.28126e-06|oas:101111152|K14211 elastin | (RefSeq) ELN; elastin	Protein digestion and absorption (ko04974)	--
gene10030	LOC105615377	116.339	4005	117.889	5166	104.428	5538	127.104	5319	112.965	3912	134.405	6669	116.702	2884	94.4967	2411	117.086	2954	131.839	6807	125.751	5418	136.254	5695	0.655446	0.168402	normal	0.852167	-0.0595924	normal	0.333508	0.211293	normal	0.348685	-0.238063	normal	0.956418	-0.0465328	normal	0.168139	-0.277674	normal	--	--	Biological Process: neural tube closure (GO:0001843);; Molecular Function: actin binding (GO:0003779);; Cellular Component: nucleus (GO:0005634);; Cellular Component: cytoplasm (GO:0005737);; Cellular Component: cytoskeleton (GO:0005856);; Biological Process: regulation of transcription from RNA polymerase II promoter (GO:0006357);; Molecular Function: Rho GTPase binding (GO:0017048);; Biological…	K05759|4.39853e-133|oas:105615377|K05759 profilin | (RefSeq) profilin-1-like	Rap1 signaling pathway (ko04015);; Regulation of actin cytoskeleton (ko04810);; Salmonella infection (ko05132)	[Z]
gene24171	LOC105604178	0	0	0	0	0	0	0	0	0	0	0	0	0	0	0	0	0	0	0	0	0	0	0	0	--	--	--	--	--	--	--	--	--	--	--	--	--	--	--	--	--	--	--	--	Molecular Function: aspartic-type endopeptidase activity (GO:0004190);; Biological Process: proteolysis (GO:0006508);;	K06002|0|oas:105604178|K06002 pepsin A [EC:3.4.23.1] | (RefSeq) pregnancy-associated glycoprotein 1-like	Protein digestion and absorption (ko04974)	[O]
gene17912	LOC101121621	30.4623	6241	30.7581	8023	31.0668	9806	25.9968	6474	30.9794	6385	27.9223	8245	35.1515	5171	33.0028	5011	32.1261	4825	30.0749	9242	30.6196	7852	30.0641	7479	0.803867	-0.0908441	normal	0.560508	0.103635	normal	0.962508	-0.0224055	normal	0.249336	0.19183	normal	0.895075	-0.0750907	normal	0.482949	0.121902	normal	[CI]	Energy production and conversion;; Lipid transport and metabolism	Cellular Component: mitochondrial inner membrane (GO:0005743);; Molecular Function: heme binding (GO:0020037);; Molecular Function: metal ion binding (GO:0046872);;	--	--	[C]
gene28721	LOC101107770	2.50317	127	3.68683	238	3.56234	278	7.10102	437	4.9967	255	6.74342	493	7.47779	272	5.00862	188	11.7521	437	7.41274	563	7.13869	453	8.10102	499	0.00947392	0.810608	normal	0.00562515	1.09488	up	4.44806e-06	1.03119	up	0.684653	0.276839	normal	0.848613	-0.206682	normal	0.93338	0.0639499	normal	[I]	Lipid transport and metabolism	Molecular Function: farnesyl-diphosphate farnesyltransferase activity (GO:0004310);; Cellular Component: endoplasmic reticulum membrane (GO:0005789);; Biological Process: cholesterol biosynthetic process (GO:0006695);; Biological Process: isoprenoid biosynthetic process (GO:0008299);; Cellular Component: integral component of membrane (GO:0016021);; Molecular Function: oxidoreductase activity (GO…	K00801|9.00002e-109|oas:101107770|K00801 farnesyl-diphosphate farnesyltransferase [EC:2.5.1.21] | (RefSeq) squalene synthase-like	Steroid biosynthesis (ko00100)	[I]
Ovis_aries_newGene_30915	--	0	0	0	0	0	0	0	0	1.04312	370	0	0	0	0	0	0	0.86991	132	0	0	0	0	0	0	0.839625	0.070268	normal	0.737703	0.15197	normal	--	--	--	0.911635	-0.0829443	normal	0.895075	0.0664657	normal	0.740546	0.145669	normal	--	--	Molecular Function: RNA-directed DNA polymerase activity (GO:0003964);; Biological Process: RNA-dependent DNA biosynthetic process (GO:0006278);;	K09228|4.78981e-36|bta:100138479|K09228 KRAB domain-containing zinc finger protein | (RefSeq) zinc finger protein 510	--	[R]
gene18874	ZNF274	3.68381	522	3.08672	720	4.44459	970	2.33096	427	3.04027	474	3.97643	884	3.60704	375	2.66862	343	3.70835	379	2.40858	658	1.36781	517	3.35284	740	0.800658	-0.199928	normal	0.496894	-0.202704	normal	0.849009	-0.198807	normal	0.977059	0.0174418	normal	0.998181	-0.00651766	normal	0.97928	0.0149139	normal	[R]	General function prediction only	Molecular Function: RNA polymerase II transcription factor activity, sequence-specific DNA binding (GO:0000981);; Molecular Function: neurotrophin p75 receptor binding (GO:0005166);; Cellular Component: nucleolus (GO:0005730);; Cellular Component: cytoplasm (GO:0005737);; Cellular Component: centrosome (GO:0005813);; Biological Process: regulation of transcription from RNA polymerase II promoter …	K12458|0|oas:101119156|K12458 zinc finger protein 274 | (RefSeq) ZNF274; zinc finger protein 274	Neurotrophin signaling pathway (ko04722)	[R]
gene14991	STAC2	2.11921	257	1.45193	239	2.17123	367	2.29729	359	2.37663	326	3.08887	554	2.08467	164	1.69345	161	2.74568	226	2.75478	491	2.52444	405	1.50918	232	0.106738	0.513941	normal	0.836194	0.116885	normal	0.856406	0.233962	normal	0.221653	-0.44054	normal	0.864403	0.226602	normal	0.791829	-0.15646	normal	--	--	Biological Process: intracellular signal transduction (GO:0035556);; Molecular Function: metal ion binding (GO:0046872);;	--	--	--
gene11311	CD276	9.15306	1459	7.7808	1572	8.71876	2145	6.55686	1272	11.7567	1258	6.52877	1491	12.1438	998	8.18219	948	12.5663	1358	13.495	2375	13.5108	2085	9.69158	1732	0.359013	-0.253338	normal	0.752621	0.124211	normal	0.651157	0.184542	normal	0.160816	0.382479	normal	0.0156549	-0.446057	normal	0.881921	-0.0654976	normal	--	--	Molecular Function: receptor binding (GO:0005102);; Cellular Component: external side of plasma membrane (GO:0009897);; Cellular Component: integral component of membrane (GO:0016021);; Biological Process: positive regulation of bone mineralization (GO:0030501);; Biological Process: positive regulation of T cell proliferation (GO:0042102);; Biological Process: negative regulation of T cell prolif…	K06746|0|oas:101111370|K06746 immune costimulatory protein B7-H3 | (RefSeq) CD276; CD276 molecule	Cell adhesion molecules (CAMs) (ko04514)	--
Ovis_aries_newGene_2969	--	0.309649	31	0.117072	15	0.222385	34	0.279548	34	0.293596	29	0.319902	45	0.258243	19	0.110589	8	0.339386	25	0.248189	37	0.16513	21	0.272823	33	0.839625	0.247364	normal	0.951757	0.0702142	normal	0.986212	0.0386767	normal	0.793279	-0.263133	normal	0.895075	0.220712	normal	0.986395	0.0179763	normal	--	--	Biological Process: nucleotide-excision repair, DNA damage recognition (GO:0000715);; Biological Process: regulation of cytokine-mediated signaling pathway (GO:0001959);; Molecular Function: damaged DNA binding (GO:0003684);; Molecular Function: single-stranded DNA binding (GO:0003697);; Molecular Function: ion channel activity (GO:0005216);; Cellular Component: nucleolus (GO:0005730);; Cellular …	K10838|1.5346e-11|oas:101109650|K10838 xeroderma pigmentosum group C-complementing protein | (RefSeq) XPC; XPC complex subunit, DNA damage recognition and repair factor	Nucleotide excision repair (ko03420)	--
Ovis_aries_newGene_35018	--	0.089458	8	0.019461	3	0.049209	7	0.037123	4	0.203459	17	0.056105	7	0.561576	33	0	0	0.118129	8	0.037281	5	0.065818	7	0.110145	11	0.842559	0.160321	normal	0.545512	0.450833	normal	0.969769	0.0559669	normal	0.696	0.413217	normal	0.950309	0.101971	normal	0.621608	0.391595	normal	--	--	--	--	--	--
gene28078	USP26	0.014354	5	0	0	0	0	0	0	0	0	0	0	0	0	0	0	0	0	0	0	0	0	0	0	0.839625	-0.0634941	normal	0.742782	-0.129753	normal	0.889302	-0.0505989	normal	--	--	--	--	--	--	--	--	--	--	--	Molecular Function: obsolete ubiquitin thiolesterase activity (GO:0004221);; Cellular Component: nucleus (GO:0005634);; Biological Process: ubiquitin-dependent protein catabolic process (GO:0006511);; Molecular Function: cysteine-type peptidase activity (GO:0008234);; Biological Process: protein deubiquitination (GO:0016579);;	K11850|0|oas:101119540|K11850 ubiquitin carboxyl-terminal hydrolase 26/29/37 [EC:3.4.19.12] | (RefSeq) USP26; ubiquitin specific peptidase 26	--	[O]
Ovis_aries_newGene_21400	--	0.074081	6	0.178942	18	0.277569	22	0.292911	25	0.150878	10	0.370107	35	0.219843	9	0.102013	6	0.10875	9	0.279776	29	0.266335	27	0.245755	19	0.816527	0.267616	normal	0.967578	-0.0474137	normal	0.856656	0.271982	normal	0.624024	-0.520541	normal	0.999368	-0.00221448	normal	0.583469	-0.473886	normal	--	--	Molecular Function: actin binding (GO:0003779);; Molecular Function: protein kinase activity (GO:0004672);; Molecular Function: phospholipid binding (GO:0005543);; Cellular Component: proteinaceous extracellular matrix (GO:0005578);; Cellular Component: mitochondrion (GO:0005739);; Cellular Component: plasma membrane (GO:0005886);; Biological Process: protein phosphorylation (GO:0006468);; Biolog…	K08111|2.63351e-22|bom:102284894|K08111 glypican 5 | (RefSeq) GPC5, Glypican-5; glypican 5	--	--
gene23520	LOC101103021	0.130361	17	0.157509	25	0.057746	12	0.092797	15	0.016707	3	0.063325	12	0.550511	50	0.373507	35	0.432072	41	0.329773	64	0.241258	38	0.165171	26	0.813049	-0.257327	normal	0.00803329	1.34947	up	0.535143	0.451624	normal	0.000705224	2.01413	up	0.153077	-0.725871	normal	0.293528	0.63782	normal	--	--	--	K06712|0|oas:101103021|K06712 butyrophilin | (RefSeq) BTN2A1, BTN2A2; butyrophilin subfamily 2 member A2	--	--
Ovis_aries_newGene_54835	--	0	0	0.152352	5	0.142787	5	0.139968	4	0.092048	2	0.755552	23	0.225828	4	0.244399	4	0	0	0.240876	8	0.249207	7	0	0	0.802243	0.193837	normal	0.914231	0.0842264	normal	0.964012	0.0388455	normal	0.758584	-0.315688	normal	0.901884	0.118431	normal	0.999182	-0.000545588	normal	--	--	--	--	--	--
gene13454	RIMS2	0.018263	12	0.010159	9	0.015539	15	0.029707	23	0.04113	26	0.036039	33	0.009008	5	0.020337	10	0.004412	3	0.026808	25	0.008274	6	0.010595	9	0.305817	0.596292	normal	0.923971	-0.106422	normal	0.998786	0.00405686	normal	0.231733	-0.968058	normal	0.542073	0.472883	normal	0.927502	-0.0994645	normal	--	--	Biological Process: intracellular protein transport (GO:0006886);; Molecular Function: Rab GTPase binding (GO:0017137);; Molecular Function: metal ion binding (GO:0046872);;	K15297|0|cfa:475066|K15297 regulating synaptic membrane exocytosis protein 2 | (RefSeq) RIMS2; regulating synaptic membrane exocytosis 2	Insulin secretion (ko04911)	[U]
gene24819	CYP17	0.448076	62	0.846084	148	1.05249	223	1.02231	171	0.602782	84	0.8398	167	0.531874	53	0.69801	71	0.212078	22	1.01722	210	2.15086	370	1.74349	291	0.950243	0.0726708	normal	0.521484	-0.495458	normal	0.180081	0.644236	normal	0.328037	-0.676615	normal	0.174324	-0.666248	normal	0.00670741	-1.30073	down	[QV]	Secondary metabolites biosynthesis, transport and catabolism;; Defense mechanisms	Molecular Function: steroid 17-alpha-monooxygenase activity (GO:0004508);; Molecular Function: iron ion binding (GO:0005506);; Cellular Component: mitochondrion (GO:0005739);; Biological Process: glucocorticoid biosynthetic process (GO:0006704);; Molecular Function: electron carrier activity (GO:0009055);; Cellular Component: membrane (GO:0016020);; Molecular Function: heme binding (GO:0020037);;…	K00512|0|oas:105601846|K00512 steroid 17alpha-monooxygenase / 17alpha-hydroxyprogesterone deacetylase [EC:1.14.14.19 1.14.14.32] | (RefSeq) CYP17; steroid 17-alpha-hydroxylase/17,20 lyase	Steroid hormone biosynthesis (ko00140);; Ovarian steroidogenesis (ko04913);; Prolactin signaling pathway (ko04917)	[Q]
gene24775	SEMA4G	1.68765	373	1.73616	499	1.74342	579	1.99388	523	1.56592	362	2.7717	693	1.88889	178	1.26116	202	0.746439	119	1.78773	560	1.74825	454	1.47208	413	0.791318	0.172365	normal	0.03122	-0.691079	normal	0.906279	-0.077273	normal	0.00841221	-0.890345	normal	0.701167	0.2399	normal	0.0687901	-0.615676	normal	--	--	Molecular Function: receptor activity (GO:0004872);; Biological Process: multicellular organism development (GO:0007275);; Cellular Component: membrane (GO:0016020);;	K06521|0|oas:101122740|K06521 semaphorin 4 | (RefSeq) SEMA4G; semaphorin 4G	Axon guidance (ko04360)	[T]
gene4445	FN1	67.7149	26090	41.5485	20414	47.8248	28337	25.5964	11967	36.052	13975	27.144	15087	74.2702	20555	103.856	29711	84.3429	23801	38.127	22090	38.4644	18573	30.0074	14072	0.0083898	-0.702247	normal	0.0162541	0.678931	normal	0.13893	-0.479452	normal	7.28725e-14	1.48058	up	0.663094	-0.229223	normal	1.94606e-10	1.22466	up	[X]	--	Biological Process: angiogenesis (GO:0001525);; Cellular Component: fibrinogen complex (GO:0005577);; Cellular Component: basement membrane (GO:0005604);; Cellular Component: endoplasmic reticulum-Golgi intermediate compartment (GO:0005793);; Biological Process: acute-phase response (GO:0006953);; Biological Process: cell-substrate junction assembly (GO:0007044);; Biological Process: calcium-inde…	K05717|0|phd:102336627|K05717 fibronectin 1 | (RefSeq) FN1; fibronectin 1	PI3K-Akt signaling pathway (ko04151);; Focal adhesion (ko04510);; ECM-receptor interaction (ko04512);; Regulation of actin cytoskeleton (ko04810);; AGE-RAGE signaling pathway in diabetic complications (ko04933);; Bacterial invasion of epithelial cells (ko05100);; Amoebiasis (ko05146);; Pathways in cancer (ko05200);; Proteoglycans in cancer (ko05205);; Small cell lung cancer (ko05222)	--
gene20907	LOC101102014	11.4493	1237	13.5823	1868	11.9899	1995	12.4048	1629	8.46326	920	11.0851	1726	15.4349	1197	13.0454	1045	17.2393	1365	11.7236	1900	8.66271	1171	10.6988	1403	0.838629	-0.157513	normal	0.271081	0.278638	normal	0.63531	-0.229147	normal	0.150021	0.441974	normal	0.966145	0.059811	normal	0.0371042	0.509776	normal	--	--	Molecular Function: purinergic nucleotide receptor activity (GO:0001614);; Molecular Function: G-protein coupled receptor activity (GO:0004930);; Molecular Function: GTP binding (GO:0005525);; Biological Process: G-protein coupled receptor signaling pathway (GO:0007186);; Cellular Component: integral component of membrane (GO:0016021);;	K08402|0|oas:101102014|K08402 G protein-coupled receptor 109 | (RefSeq) HCAR2, HCAR3; hydroxycarboxylic acid receptor 2	cAMP signaling pathway (ko04024)	--
Ovis_aries_newGene_6872	--	1.46567	76	1.50433	110	0.923145	81	0.564306	38	1.06118	60	0.27308	24	0	0	1.02706	42	1.04302	40	0.184645	17	0.563814	41	0.358695	27	0.420762	-0.523821	normal	0.710044	-0.363133	normal	0.0394553	-0.840005	normal	0.995239	0.00844432	normal	0.873256	0.280853	normal	0.791567	0.226742	normal	--	--	Biological Process: apoptotic process (GO:0006915);; Biological Process: cell surface receptor signaling pathway (GO:0007166);; Biological Process: response to organic substance (GO:0010033);; Cellular Component: integral component of membrane (GO:0016021);;	--	--	--
gene29201	LOC101115353	0.20439	9	0.095622	6	0.306399	21	0.096054	6	0.069821	4	0.122691	8	0.395022	13	0.2401	8	1.11557	36	0.157655	11	0.047268	3	0.120186	7	0.821444	-0.244017	normal	0.338985	0.702499	normal	0.889302	-0.184057	normal	0.0661464	1.37129	normal	0.994087	-0.0167072	normal	0.108536	0.984899	normal	--	--	Cellular Component: intracellular (GO:0005622);; Biological Process: signal transduction (GO:0007165);;	K20641|4.04008e-106|oas:101115353|K20641 Rho GTPase-activating protein 20 | (RefSeq) rho GTPase-activating protein 20-like	--	[T]
gene6946	TXNRD1	38.7988	6984	42.6126	9759	33.0754	9154	45.4727	9897	48.0732	8671	39.7413	10298	27.5616	3573	28.5679	3819	31.4934	4112	41.5635	11200	38.386	8622	39.1828	8557	0.482047	0.230085	normal	0.0382517	-0.39215	normal	0.940805	0.0536409	normal	1.20923e-05	-0.643156	normal	0.60979	0.1737	normal	0.000265829	-0.456736	normal	[C]	Energy production and conversion	Biological Process: mesoderm formation (GO:0001707);; Molecular Function: thioredoxin-disulfide reductase activity (GO:0004791);; Cellular Component: nucleolus (GO:0005730);; Cellular Component: mitochondrion (GO:0005739);; Cellular Component: cytosol (GO:0005829);; Biological Process: cell proliferation (GO:0008283);; Biological Process: cell redox homeostasis (GO:0045454);; Molecular Function: …	K00384|0|oas:101112970|K00384 thioredoxin reductase (NADPH) [EC:1.8.1.9] | (RefSeq) TXNRD1; thioredoxin reductase 1	Pyrimidine metabolism (ko00240);; Selenocompound metabolism (ko00450)	[O]
Ovis_aries_newGene_48652	--	0	0	0.69318	179	0.740229	231	0.519885	128	0	0	0.497428	146	0	0	0	0	0	0	0	0	0	0	0	0	0.971266	-0.0188205	normal	0.664556	-0.209593	normal	0.889302	-0.0764343	normal	0.583846	-0.379272	normal	0.887187	0.0967011	normal	--	--	--	--	--	--	--	--	--
Ovis_aries_newGene_31801	--	0.183746	7	0.168052	8	0.154783	8	0.351734	15	0	0	0.254843	13	0.505046	12	0.082648	3	0	0	0.282854	14	0.330632	14	0.050441	3	0.962114	0.0450192	normal	0.96991	0.0381597	normal	0.959444	0.073138	normal	0.979555	-0.031834	normal	0.998181	-0.00695687	normal	0.967168	-0.0391435	normal	--	--	--	--	--	--
gene1324	SHC1	32.3881	4495	27.2186	4804	26.3747	5685	29.4277	5298	28.1207	4038	29.8586	6033	32.1521	3223	33.0294	3573	35.0553	3727	26.9967	5661	34.3385	6305	31.3438	5553	0.839625	0.0969311	normal	0.248407	0.246424	normal	0.87114	0.150525	normal	0.539891	0.143627	normal	0.945867	-0.0648315	normal	0.812174	0.0810877	normal	--	--	Biological Process: activation of MAPK activity (GO:0000187);; Biological Process: angiogenesis (GO:0001525);; Molecular Function: insulin receptor binding (GO:0005158);; Molecular Function: insulin-like growth factor receptor binding (GO:0005159);; Molecular Function: neurotrophin TRKA receptor binding (GO:0005168);; Cellular Component: cytoplasm (GO:0005737);; Cellular Component: plasma membran…	K06279|0|oas:101113548|K06279 SHC-transforming protein 1 | (RefSeq) SHC1; SHC adaptor protein 1	EGFR tyrosine kinase inhibitor resistance (ko01521);; Endocrine resistance (ko01522);; ErbB signaling pathway (ko04012);; Ras signaling pathway (ko04014);; Chemokine signaling pathway (ko04062);; Phospholipase D signaling pathway (ko04072);; Focal adhesion (ko04510);; Natural killer cell mediated cytotoxicity (ko04650);; Neurotrophin signaling pathway (ko04722);; Insulin signaling pathway (ko0491…	[T]
gene10982	SLC2A9	0.013286	3	0.005218	2	0.002156	1	0	0	0	0	0	0	0.026576	3	0.035079	4	0.018126	3	0.033796	8	0.005307	2	0.008206	2	0.768364	-0.125521	normal	0.667399	0.366613	normal	0.929524	0.0796459	normal	0.283037	0.767329	normal	0.740322	-0.181628	normal	0.837406	0.181647	normal	[G]	Carbohydrate transport and metabolism	--	K08146|0|oas:101104402|K08146 MFS transporter, SP family, solute carrier family 2 (facilitated glucose transporter), member 9 | (RefSeq) SLC2A9; solute carrier family 2 member 9	--	[G]
gene14510	LOC101107034	0	0	0	0	0	0	0	0	0	0	0	0	0	0	0	0	0	0	0	0	0	0	0	0	--	--	--	--	--	--	--	--	--	--	--	--	--	--	--	--	--	--	--	--	Molecular Function: G-protein coupled receptor activity (GO:0004930);; Molecular Function: olfactory receptor activity (GO:0004984);; Cellular Component: plasma membrane (GO:0005886);; Biological Process: G-protein coupled receptor signaling pathway (GO:0007186);; Cellular Component: integral component of membrane (GO:0016021);; Biological Process: detection of chemical stimulus involved in senso…	K04257|0|oas:101107034|K04257 olfactory receptor | (RefSeq) olfactory receptor 1A1-like	Olfactory transduction (ko04740)	--
gene1022	PHGDH	31.206	3441	33.33	4633	29.5852	5068	41.8668	5659	42.7556	4768	42.4846	6792	22.2505	1777	23.6112	1946	18.1772	1482	34.439	5727	34.6824	4827	34.6672	4681	0.000101401	0.461315	normal	0.0031478	-0.539742	normal	0.554023	0.150039	normal	2.44164e-10	-1.01711	down	0.0128836	0.305756	normal	3.42936e-05	-0.694152	normal	[HR]	Coenzyme transport and metabolism;; General function prediction only	Molecular Function: phosphoglycerate dehydrogenase activity (GO:0004617);; Biological Process: glutamine metabolic process (GO:0006541);; Biological Process: glycine metabolic process (GO:0006544);; Biological Process: L-serine biosynthetic process (GO:0006564);; Biological Process: threonine metabolic process (GO:0006566);; Biological Process: gamma-aminobutyric acid metabolic process (GO:000944…	K00058|0|oas:101111328|K00058 D-3-phosphoglycerate dehydrogenase [EC:1.1.1.95] | (RefSeq) PHGDH; phosphoglycerate dehydrogenase	Glycine, serine and threonine metabolism (ko00260);; Carbon metabolism (ko01200);; Biosynthesis of amino acids (ko01230)	[E]
gene1510	PEA15	55.7017	6734	47.2909	7284	57.8943	10790	37.8923	5571	40.3811	4913	43.7683	7632	57.3314	4978	56.2949	5041	68.2335	6051	48.8972	8872	45.4158	6873	45.4032	6680	0.0708246	-0.352326	normal	0.588953	0.15663	normal	0.558158	-0.191965	normal	0.00147739	0.51801	normal	0.555253	-0.168658	normal	0.0346931	0.350962	normal	--	--	Biological Process: negative regulation of apoptotic process (GO:0043066);; Biological Process: negative regulation of glucose import (GO:0046325);;	--	--	[D]
gene5156	C3H9orf16	0	0	0.004143	1	0	0	0	0	0.028181	1	0.005893	1	0	0	0.026216	1	0	0	0	0	0	0	0	0	0.951269	0.0208679	normal	0.947377	0.0299197	normal	--	--	--	0.975227	-0.0224668	normal	0.895185	0.0517879	normal	--	--	--	--	--	--	--	--	--
gene18462	SULT2B1	25.4451	1467	30.0139	2202	26.2982	2335	30.9468	2168	25.8302	1498	27.7903	2308	24.6521	1020	18.9724	811	20.3453	860	26.2888	2272	29.1304	2101	31.8834	2231	0.888258	0.076656	normal	0.116404	-0.357249	normal	0.889302	0.0896733	normal	0.0611238	-0.444529	normal	0.985778	-0.020065	normal	0.0446593	-0.452284	normal	--	--	Biological Process: sulfate assimilation (GO:0000103);; Biological Process: steroid metabolic process (GO:0008202);; Molecular Function: steroid sulfotransferase activity (GO:0050294);;	K01015|0|oas:101122543|K01015 alcohol sulfotransferase [EC:2.8.2.2] | (RefSeq) SULT2B1; sulfotransferase family 2B member 1	Steroid hormone biosynthesis (ko00140)	[R]
Ovis_aries_newGene_8080	--	0.148885	7	0.705842	38	0.339468	22	0.405232	21	0.652832	28	0.359085	22	0.371317	12	0	0	0.346415	11	0.521539	33	0.547511	29	0.595429	31	0.936517	0.0957293	normal	0.806541	-0.219769	normal	0.889302	0.168099	normal	0.692173	-0.459607	normal	0.952666	-0.117413	normal	0.628151	-0.431368	normal	--	--	--	--	--	--
gene12683	LOC101102987	0	0	0	0	0	0	0	0	0	0	0	0	0	0	0	0	0	0	0	0	0	0	0	0	--	--	--	--	--	--	--	--	--	--	--	--	--	--	--	--	--	--	--	--	Molecular Function: trace-amine receptor activity (GO:0001594);; Cellular Component: integral component of membrane (GO:0016021);;	K05051|0|oas:101102987|K05051 trace amine associated receptor | (RefSeq) trace amine-associated receptor 6	Neuroactive ligand-receptor interaction (ko04080)	[R]
gene13713	LRCH1	6.64721	1476	7.99028	2158	7.19146	2656	4.6998	1370	5.51735	1231	5.47702	1892	7.52915	1295	7.92687	1246	9.00293	1435	6.50096	2338	5.29568	1590	6.70761	1766	0.0489509	-0.371388	normal	0.627131	0.133917	normal	0.705907	-0.179639	normal	0.00180173	0.51407	normal	0.663724	-0.192975	normal	0.133228	0.315039	normal	[K]	Transcription	--	--	--	[Z]
gene15918	PRRX1	24.4616	6728	15.9423	5568	25.0256	8473	16.7988	5719	27.7127	7845	21.2478	8402	19.8789	3902	25.2909	4716	30.5167	6109	19.5189	8090	23.0775	8076	16.2028	5596	0.839625	0.143838	normal	0.576683	0.245294	normal	0.994773	-0.0104941	normal	0.849421	0.0905827	normal	0.895075	0.150749	normal	0.504397	0.256429	normal	--	--	Biological Process: positive regulation of mesenchymal cell proliferation (GO:0002053);; Molecular Function: transcription factor activity, sequence-specific DNA binding (GO:0003700);; Cellular Component: nucleolus (GO:0005730);; Biological Process: regulation of transcription, DNA-templated (GO:0006355);; Biological Process: embryonic limb morphogenesis (GO:0030326);; Biological Process: inner e…	K09329|4.05824e-171|oas:101103742|K09329 paired mesoderm homeobox protein | (RefSeq) PRRX1; paired related homeobox 1	--	[R]
gene9061	LOC101109271	0	0	0	0	0	0	0	0	0	0	0	0	0	0	0	0	0	0	0	0	0	0	0	0	--	--	--	--	--	--	--	--	--	--	--	--	--	--	--	--	--	--	--	--	--	K04257|1.04542e-178|oas:101109271|K04257 olfactory receptor | (RefSeq) olfactory receptor 18-like	Olfactory transduction (ko04740)	--
gene6214	METTL25	1.53176	175	1.68841	282	1.57121	258	1.09726	138	1.71034	237	1.24467	212	1.39287	167	2.37637	151	1.54984	120	1.19959	220	1.91633	317	1.40447	217	0.893198	-0.129046	normal	0.914657	0.0677337	normal	0.987034	0.0291976	normal	0.725404	0.218146	normal	0.913141	-0.153302	normal	0.968339	0.0288938	normal	--	--	--	--	--	[A]
gene7605	SCUBE1	0.231234	49	0.202587	54	0.288142	93	0.378157	96	0.640589	106	0.241499	73	0.129861	20	0.210613	33	0.206858	32	0.677754	120	0.33427	88	0.180105	46	0.530588	0.433179	normal	0.705163	-0.313863	normal	0.889302	0.185246	normal	0.135442	-0.883452	normal	0.895075	0.205019	normal	0.445521	-0.52485	normal	--	--	Molecular Function: calcium ion binding (GO:0005509);; Cellular Component: extracellular space (GO:0005615);; Cellular Component: external side of plasma membrane (GO:0009897);; Cellular Component: extrinsic component of plasma membrane (GO:0019897);; Molecular Function: identical protein binding (GO:0042802);; Molecular Function: protein heterodimerization activity (GO:0046982);; Biological Proc…	--	--	[T]
gene24271	SLC22A8	0	0	0	0	0	0	0	0	0	0	0	0	0	0	0	0	0	0	0	0	0	0	0	0	--	--	--	--	--	--	--	--	--	--	--	--	--	--	--	--	--	--	[G]	Carbohydrate transport and metabolism	Molecular Function: inorganic anion exchanger activity (GO:0005452);; Biological Process: response to toxic substance (GO:0009636);; Cellular Component: integral component of membrane (GO:0016021);; Cellular Component: basolateral plasma membrane (GO:0016323);;	K08205|0|oas:101117544|K08205 MFS transporter, OCT family, solute carrier family 22 (organic anion transporter), member 8 | (RefSeq) SLC22A8; solute carrier family 22 member 8	Bile secretion (ko04976)	[R]
gene1663	SLC5A3	7.44748	4214	6.53536	4706	7.39636	6455	4.64349	3198	6.81259	3876	4.27487	3483	4.64963	1891	5.8477	2453	4.20938	1737	5.85391	4958	5.43294	3852	5.33326	3666	0.244281	-0.379052	normal	0.0144408	-0.533259	normal	0.0216251	-0.348707	normal	0.747611	-0.134254	normal	0.962446	-0.0573057	normal	0.574425	-0.188635	normal	[R]	General function prediction only	Cellular Component: plasma membrane (GO:0005886);; Biological Process: inositol metabolic process (GO:0006020);; Biological Process: sodium ion transport (GO:0006814);; Biological Process: peripheral nervous system development (GO:0007422);; Molecular Function: symporter activity (GO:0015293);; Biological Process: myo-inositol transport (GO:0015798);; Cellular Component: integral component of mem…	K14383|0|oas:101120123|K14383 solute carrier family 5 (sodium/myo-inositol cotransporter), member 3 | (RefSeq) SLC5A3; solute carrier family 5 member 3	--	[P]
gene21785	FKBP3	36.8364	2038	31.399	2212	35.4377	3021	32.0132	2153	37.0082	2060	32.6749	2606	34.9021	1387	33.672	1381	34.0417	1381	33.296	2763	37.2977	2583	33.8455	2274	0.99986	-4.42598e-05	normal	0.925045	-0.0287801	normal	0.989785	0.0114723	normal	0.901136	-0.0332878	normal	0.983574	-0.0181885	normal	0.866011	-0.04452	normal	[O]	Posttranslational modification, protein turnover, chaperones	Biological Process: protein peptidyl-prolyl isomerization (GO:0000413);; Molecular Function: peptidyl-prolyl cis-trans isomerase activity (GO:0003755);; Molecular Function: FK506 binding (GO:0005528);; Cellular Component: nucleus (GO:0005634);; Biological Process: protein folding (GO:0006457);; Cellular Component: membrane (GO:0016020);;	K09570|0|oas:101109649|K09570 FK506-binding protein 3 [EC:5.2.1.8] | (RefSeq) FKBP3; FK506 binding protein 3	--	[O]
Ovis_aries_newGene_37803	--	0.476198	13	0	0	0	0	0	0	0	0	0	0	0	0	0	0	0	0	0	0	0	0	0	0	0.839625	-0.0741085	normal	0.739708	-0.142684	normal	0.889302	-0.058378	normal	--	--	--	--	--	--	--	--	--	--	--	Molecular Function: nucleotide binding (GO:0000166);; Cellular Component: voltage-gated sodium channel complex (GO:0001518);; Biological Process: detection of chemical stimulus involved in sensory perception of bitter taste (GO:0001580);; Molecular Function: RNA binding (GO:0003723);; Molecular Function: G-protein coupled receptor activity (GO:0004930);; Molecular Function: voltage-gated sodium c…	K17086|6.2714e-27|bta:509946|K17086 transmembrane 9 superfamily member 2/4 | (RefSeq) transmembrane 9 superfamily member 2-like	--	--
gene14428	CRYBA1	0	0	0.058284	4	0	0	0	0	0	0	0	0	0	0	0	0	0	0	0	0	0	0	0	0	0.839625	-0.0602577	normal	0.750329	-0.120332	normal	0.889302	-0.048239	normal	--	--	--	--	--	--	--	--	--	--	--	Molecular Function: structural constituent of eye lens (GO:0005212);; Molecular Function: protein homodimerization activity (GO:0042803);; Biological Process: camera-type eye development (GO:0043010);;	--	--	--
Ovis_aries_newGene_50862	--	0.275426	21	0.244947	24	0.244159	29	0.050348	5	0.200969	16	0.217302	24	0.051756	3	0.141865	9	0.090094	6	0.294702	34	0.113401	11	0.223128	21	0.834894	-0.255179	normal	0.344872	-0.692628	normal	0.945296	-0.108654	normal	0.76936	-0.326665	normal	0.937339	-0.130474	normal	0.59269	-0.473868	normal	--	--	Cellular Component: intracellular part (GO:0044424);;	--	--	--
gene2551	PIK3CB	11.736	2668	11.0912	3210	10.6735	3745	10.7666	2980	8.79857	1870	8.88978	2917	12.0729	1974	10.4627	1766	9.84161	1646	9.90821	3385	11.4315	3257	9.60827	2656	0.610599	-0.214894	normal	0.840966	-0.0604954	normal	0.889302	-0.105936	normal	0.66674	0.16037	normal	0.895075	-0.116448	normal	0.900049	0.0448839	normal	--	--	Biological Process: regulation of cell-matrix adhesion (GO:0001952);; Molecular Function: ATP binding (GO:0005524);; Cellular Component: plasma membrane (GO:0005886);; Cellular Component: phosphatidylinositol 3-kinase complex (GO:0005942);; Biological Process: cellular calcium ion homeostasis (GO:0006874);; Biological Process: homophilic cell adhesion via plasma membrane adhesion molecules (GO:00…	K00922|0|phd:102320516|K00922 phosphatidylinositol-4,5-bisphosphate 3-kinase catalytic subunit alpha/beta/delta [EC:2.7.1.153] | (RefSeq) PIK3CB; phosphatidylinositol-4,5-bisphosphate 3-kinase catalytic subunit beta	Inositol phosphate metabolism (ko00562);; EGFR tyrosine kinase inhibitor resistance (ko01521);; Endocrine resistance (ko01522);; Platinum drug resistance (ko01524);; ErbB signaling pathway (ko04012);; Ras signaling pathway (ko04014);; Rap1 signaling pathway (ko04015);; cGMP-PKG signaling pathway (ko04022);; cAMP signaling pathway (ko04024);; Chemokine signaling pathway (ko04062);; HIF-1 signaling…	[T]
gene259	PPCS	2.07046	212	4.32	510	2.57931	318	4.22991	492	2.97972	303	3.5698	457	3.83736	215	4.41691	320	3.40158	213	2.60247	317	3.07361	302	2.82873	357	0.758841	0.27143	normal	0.715153	0.261193	normal	0.948601	-0.0939485	normal	0.937766	-0.05255	normal	0.41644	0.405669	normal	0.378069	0.389965	normal	--	--	--	K01922|4.19734e-123|oas:100145879|K01922 phosphopantothenate-cysteine ligase [EC:6.3.2.5] | (RefSeq) PPCS, DFP; phosphopantothenoylcysteine synthetase	Pantothenate and CoA biosynthesis (ko00770)	[R]
Ovis_aries_newGene_59193	--	0	0	0	0	0	0	0	0	0.148607	3	0	0	0	0	0	0	0	0	0	0	0	0	0.369341	7	0.839625	0.059862	normal	--	--	--	0.889302	0.0510728	normal	0.713586	-0.200692	normal	0.973388	-0.0215586	normal	0.744783	-0.127382	normal	--	--	--	--	--	--
gene13390	FABP4	153.616	3058	148.136	3754	182.497	5597	262.325	6347	195.803	3921	340.24	9760	316.621	4525	338.705	4996	299.492	4370	243.868	7281	241.919	6027	267.229	6459	0.0212034	0.657639	normal	1.81811e-10	0.941497	normal	8.02065e-05	0.601678	normal	0.659436	0.1959	normal	0.933613	0.0955991	normal	0.0552727	0.315164	normal	--	--	Biological Process: cytokine production (GO:0001816);; Molecular Function: transporter activity (GO:0005215);; Cellular Component: nucleus (GO:0005634);; Cellular Component: cytoplasm (GO:0005737);; Biological Process: negative regulation of protein kinase activity (GO:0006469);; Biological Process: transport (GO:0006810);; Molecular Function: lipid binding (GO:0008289);; Biological Process: chol…	K08753|3.18475e-91|oas:100137067|K08753 fatty acid-binding protein 4, adipocyte | (RefSeq) FABP4; fatty acid binding protein 4, adipocyte	PPAR signaling pathway (ko03320);; Regulation of lipolysis in adipocytes (ko04923)	[I]
gene28151	UTP14A	30.3287	4460	29.9304	5611	38.4165	8616	28.818	5120	29.7349	4391	30.1443	6526	35.2483	3822	34.3578	3861	36.6445	4087	31.2026	6860	28.8094	5408	35.539	6292	0.839625	-0.106569	normal	0.642107	0.137199	normal	0.972976	-0.0342852	normal	0.0801931	0.246122	normal	0.895549	-0.0787702	normal	0.478887	0.168636	normal	--	--	Cellular Component: nucleolus (GO:0005730);; Biological Process: rRNA processing (GO:0006364);; Cellular Component: small-subunit processome (GO:0032040);;	K14567|0|oas:101120809|K14567 U3 small nucleolar RNA-associated protein 14 | (RefSeq) UTP14A; UTP14A small subunit processome component	Ribosome biogenesis in eukaryotes (ko03008)	[S]
gene2707	FAM207A	4.51688	616	3.7706	658	4.28968	907	5.00259	829	4.6463	638	4.88288	963	2.69615	262	2.64864	265	3.5498	352	4.61117	948	4.44356	751	4.67095	781	0.529639	0.222382	normal	0.0555774	-0.505449	normal	0.889302	0.117112	normal	0.00153132	-0.749853	normal	0.895075	0.0995513	normal	0.00716981	-0.62988	normal	--	--	--	--	--	--
gene20883	TCTN2	5.97876	671	5.03097	719	6.40488	1043	4.49601	620	4.12171	475	4.76514	785	4.7194	390	5.37074	456	5.21445	438	4.97614	856	4.73324	672	4.70025	654	0.419753	-0.271716	normal	0.724121	-0.132798	normal	0.653454	-0.200255	normal	0.683338	0.14627	normal	0.918235	-0.0788269	normal	0.828986	0.0710868	normal	--	--	Biological Process: smoothened signaling pathway (GO:0007224);; Cellular Component: MKS complex (GO:0036038);; Biological Process: cilium assembly (GO:0042384);;	K19361|0|oas:101121804|K19361 tectonic-2 | (RefSeq) TCTN2; tectonic family member 2	--	--
gene13515	MATN2	21.6197	4161	22.6024	5475	21.1702	6253	21.8979	5054	22.5359	4261	21.0182	5766	24.2381	3305	17.6225	2589	23.3624	3257	22.9124	6502	22.7136	5426	20.5629	4751	0.969931	0.014845	normal	0.970495	-0.013773	normal	0.991107	0.00801349	normal	0.929798	-0.0328154	normal	0.999785	0.00024798	normal	0.946242	-0.0250863	normal	--	--	Biological Process: neuron migration (GO:0001764);; Molecular Function: calcium ion binding (GO:0005509);; Cellular Component: basement membrane (GO:0005604);; Biological Process: axon guidance (GO:0007411);; Biological Process: glial cell migration (GO:0008347);; Biological Process: dendrite regeneration (GO:0031104);; Biological Process: response to axon injury (GO:0048678);;	--	--	[T]
gene17001	GID8	21.6776	3719	21.1269	4611	20.4499	5490	24.3467	5003	24.4125	4168	24	5829	17.8008	2152	17.6829	2251	18.0138	2283	20.5495	5476	20.4517	4429	23.5247	4854	0.227937	0.199465	normal	0.0261238	-0.265147	normal	0.951186	0.0372797	normal	8.66171e-05	-0.473009	normal	0.671231	0.153049	normal	0.0502994	-0.305891	normal	--	--	Cellular Component: nucleus (GO:0005634);;	--	--	[Z]
gene11202	PAPD4	14.2177	3325	13.1449	2827	13.6353	3663	11.6656	2494	13.4693	2443	12.0832	4049	16.1652	1853	14.6681	2632	15.7991	2534	13.1182	4748	12.6732	2788	11.8534	2474	0.907971	-0.0828022	normal	0.563813	0.244718	normal	0.948542	-0.0782178	normal	0.235222	0.338772	normal	0.998181	-0.00493787	normal	0.371713	0.328032	normal	--	--	Molecular Function: polynucleotide adenylyltransferase activity (GO:0004652);; Molecular Function: ATP binding (GO:0005524);; Cellular Component: nucleus (GO:0005634);; Cellular Component: cytoplasm (GO:0005737);; Biological Process: mRNA processing (GO:0006397);; Biological Process: RNA polyadenylation (GO:0043631);; Molecular Function: metal ion binding (GO:0046872);; Biological Process: histon…	K14079|0|oas:101114360|K14079 poly(A) RNA polymerase GLD2 [EC:2.7.7.19] | (RefSeq) PAPD4; poly(A) RNA polymerase D4, non-canonical	--	[D]
gene25864	CRYM	12.3001	890	9.73049	930	9.40248	1075	10.5226	952	5.52605	422	13.2705	1438	38.6169	1957	25.0889	1385	31.7788	1742	18.8647	1998	15.3976	1437	15.875	1508	0.979756	-0.0286528	normal	3.32799e-13	1.49423	up	0.000541012	0.632241	normal	1.97781e-05	1.47808	up	0.231666	-0.563588	normal	3.41394e-05	0.844742	normal	[E]	Amino acid transport and metabolism	Biological Process: negative regulation of transcription from RNA polymerase II promoter (GO:0000122);; Molecular Function: transcription corepressor activity (GO:0003714);; Cellular Component: nucleus (GO:0005634);; Cellular Component: mitochondrion (GO:0005739);; Cellular Component: plasma membrane (GO:0005886);; Biological Process: sensory perception of sound (GO:0007605);; Biological Process:…	K18258|0|oas:101102280|K18258 thiomorpholine-carboxylate dehydrogenase [EC:1.5.1.25] | (RefSeq) CRYM; crystallin mu	--	[E]
gene10794	LOC105615513	0	0	0	0	0	0	0	0	0	0	0	0	0	0	0.052674	5	0	0	0	0	0	0	0.010984	2	--	--	--	0.739708	0.141031	normal	0.889302	0.042617	normal	0.692173	0.240439	normal	0.895549	-0.0505706	normal	0.845185	0.080046	normal	--	--	--	--	--	--
gene21658	LOC105603299	1.3628	29	0.83423	23	1.50511	50	1.76044	46	1.00623	22	1.08977	34	31.4063	480	8.3402	132	10.4982	164	5.06289	162	2.72288	73	5.80269	150	0.96532	0.0561467	normal	5.81782e-09	2.57873	up	0.00384655	1.03554	up	6.20839e-09	2.88208	up	0.009812	-1.03952	down	0.0107976	1.28936	up	[O]	Posttranslational modification, protein turnover, chaperones	Molecular Function: serine-type endopeptidase activity (GO:0004252);; Biological Process: proteolysis (GO:0006508);;	K09616|8.6282e-42|oas:105603299|K09616 granzyme H (cathepsin G-like 2) [EC:3.4.21.-] | (RefSeq) granzyme H-like	--	[E]
gene28641	LOC101112797	0	0	0	0	0	0	0	0	0	0	0	0	0	0	0	0	0	0	0	0	0	0	0	0	--	--	--	--	--	--	--	--	--	--	--	--	--	--	--	--	--	--	--	--	Molecular Function: G-protein coupled receptor activity (GO:0004930);; Molecular Function: olfactory receptor activity (GO:0004984);; Cellular Component: plasma membrane (GO:0005886);; Biological Process: G-protein coupled receptor signaling pathway (GO:0007186);; Cellular Component: integral component of membrane (GO:0016021);; Biological Process: detection of chemical stimulus involved in senso…	K04257|0|oas:101112797|K04257 olfactory receptor | (RefSeq) olfactory receptor 10AG1-like	Olfactory transduction (ko04740)	--
gene13026	HSF1	23.1327	1967	21.2708	2294	19.9701	2630	19.7555	2062	18.2614	1572	20.6951	2539	17.9393	1114	15.8848	998	15.0549	938	22.2041	2852	18.9446	2026	22.6901	2331	0.839625	-0.0887368	normal	0.0339434	-0.394863	normal	0.994773	-0.00728451	normal	0.157896	-0.311028	normal	0.895549	-0.0870941	normal	0.0604655	-0.389647	normal	--	--	Molecular Function: RNA polymerase II intronic transcription regulatory region sequence-specific DNA binding (GO:0001162);; Biological Process: embryonic placenta development (GO:0001892);; Molecular Function: chromatin binding (GO:0003682);; Molecular Function: transcription factor activity, sequence-specific DNA binding (GO:0003700);; Cellular Component: cytoplasm (GO:0005737);; Biological Proc…	K09414|0|oas:101109368|K09414 heat shock transcription factor 1 | (RefSeq) HSF1; heat shock transcription factor 1	Legionellosis (ko05134)	[K]
Ovis_aries_newGene_39085	--	1.21411	507	1.50936	541	1.32737	665	1.0816	423	1.91409	477	1.214	770	0.820194	189	1.65616	371	0.596573	181	1.28714	604	1.41067	416	1.08098	355	0.984352	0.0171605	normal	0.477856	-0.386145	normal	0.336888	-0.358179	normal	0.428377	-0.42697	normal	0.476497	0.361875	normal	0.966298	-0.0331827	normal	--	--	Molecular Function: actin binding (GO:0003779);; Biological Process: cellular process (GO:0009987);; Cellular Component: membrane (GO:0016020);; Molecular Function: anion binding (GO:0043168);; Cellular Component: cell part (GO:0044464);; Biological Process: single-organism process (GO:0044699);; Biological Process: regulation of biological process (GO:0050789);;	K09228|1.11046e-25|bta:100138479|K09228 KRAB domain-containing zinc finger protein | (RefSeq) zinc finger protein 510	--	--
Ovis_aries_newGene_58249	--	0.634275	109	0.549926	120	0.753178	199	0.413194	86	0.694963	120	0.446916	111	0.164141	21	0.379991	49	0.096493	13	0.25395	66	0.337815	73	0.338945	71	0.826835	-0.22827	normal	0.039332	-1.10051	down	0.02555	-0.774861	normal	0.133691	-0.992628	normal	0.367321	0.529209	normal	0.72581	-0.340439	normal	--	--	--	--	--	--
gene22221	VHL	10.3935	1310	10.5447	1702	11.397	2226	0.864513	135	9.90957	1640	9.80753	1808	7.76852	698	9.64735	907	10.7042	1004	8.00788	1523	10.862	1714	8.91258	1384	0.904281	-0.125166	normal	0.540408	-0.204681	normal	0.733173	-0.196141	normal	0.920499	0.135663	normal	0.974112	-0.0635178	normal	0.995072	-0.00291269	normal	--	--	Biological Process: angiogenesis (GO:0001525);; Cellular Component: nucleus (GO:0005634);; Cellular Component: cytoplasm (GO:0005737);; Biological Process: proteasomal protein catabolic process (GO:0010498);; Cellular Component: membrane (GO:0016020);; Biological Process: protein ubiquitination (GO:0016567);; Biological Process: extracellular matrix organization (GO:0030198);; Biological Process:…	K03871|3.10683e-152|oas:101122897|K03871 von Hippel-Lindau disease tumor supressor | (RefSeq) VHL; von Hippel-Lindau tumor suppressor	HIF-1 signaling pathway (ko04066);; Ubiquitin mediated proteolysis (ko04120);; Pathways in cancer (ko05200);; Renal cell carcinoma (ko05211)	[O]
gene15696	PLEKHA6	8.43818	1341	7.7201	1536	8.26515	1936	9.95502	1842	9.03113	1378	10.1592	1887	7.83062	889	7.25675	701	7.06281	794	9.34322	2159	9.58905	1825	8.62191	1518	0.683751	0.164065	normal	0.380756	-0.228245	normal	0.864522	0.11978	normal	0.0845495	-0.403041	normal	0.970073	0.0379325	normal	0.114616	-0.352515	normal	--	--	--	--	--	--
gene27940	CETN2	29.3691	1614	29.8819	2093	37.7573	2620	31.2681	2091	28.3073	1312	27.8783	2213	37.9679	1495	37.3822	1522	42.5439	1714	29.0428	2399	32.6713	2111	33.5051	2108	0.890042	-0.0801004	normal	0.0113437	0.363099	normal	0.979575	0.0187209	normal	0.0623789	0.439183	normal	0.895549	-0.104384	normal	0.0412283	0.338076	normal	[T]	Signal transduction mechanisms	Molecular Function: nucleic acid binding (GO:0003676);; Molecular Function: calcium ion binding (GO:0005509);; Molecular Function: ATP binding (GO:0005524);; Cellular Component: centriole (GO:0005814);; Cellular Component: ciliary basal body (GO:0005932);; Biological Process: nucleotide-excision repair (GO:0006289);; Biological Process: mitotic cell cycle (GO:0007067);; Biological Process: centri…	K10840|2.26459e-102|oas:100302545|K10840 centrin-2 | (RefSeq) CETN2; centrin 2	Nucleotide excision repair (ko03420)	[ZD]
gene26459	NTPCR	28.4061	1716	28.2119	2173	29.8165	2802	24.3031	1760	22.5569	1362	26.8222	2327	22.6798	1000	24.9331	1089	25.5831	1118	22.6821	2036	26.6545	1995	28.0606	2063	0.482733	-0.205554	normal	0.0837285	-0.267298	normal	0.783112	-0.160109	normal	0.851072	-0.0599796	normal	0.96461	-0.0482573	normal	0.755272	-0.102187	normal	[F]	Nucleotide transport and metabolism	Molecular Function: ATP binding (GO:0005524);; Molecular Function: transferase activity (GO:0016740);; Molecular Function: nucleoside-triphosphatase activity (GO:0017111);; Molecular Function: obsolete nucleotide phosphatase activity (GO:0019204);;	K06928|2.9165e-133|oas:101112698|K06928 nucleoside-triphosphatase [EC:3.6.1.15] | (RefSeq) NTPCR; nucleoside-triphosphatase, cancer-related	Purine metabolism (ko00230);; Thiamine metabolism (ko00730)	--
gene657	PTGFR	6.14781	1619	4.20176	1403	6.84021	2747	2.39698	767	5.13543	1336	3.42439	1298	3.87155	728	6.30999	1230	6.49444	1237	3.88865	1525	5.40548	1773	3.16962	1005	0.238167	-0.512747	normal	0.935743	-0.054274	normal	0.522365	-0.371706	normal	0.210112	0.533708	normal	0.913141	-0.140074	normal	0.442949	0.361989	normal	--	--	Molecular Function: prostaglandin F receptor activity (GO:0004958);; Cellular Component: extracellular region (GO:0005576);; Cellular Component: cytoplasm (GO:0005737);; Cellular Component: plasma membrane (GO:0005886);; Biological Process: G-protein coupled receptor signaling pathway (GO:0007186);; Cellular Component: integral component of membrane (GO:0016021);; Biological Process: response to …	K04262|0|chx:102173625|K04262 prostaglandin F receptor | (RefSeq) PTGFR; prostaglandin F receptor	Calcium signaling pathway (ko04020);; Phospholipase D signaling pathway (ko04072);; Neuroactive ligand-receptor interaction (ko04080)	[R]
gene7121	LOC101115109	0	0	0	0	0	0	0	0	0	0	0	0	0	0	0	0	0	0	0	0	0	0	0	0	--	--	--	--	--	--	--	--	--	--	--	--	--	--	--	--	--	--	[J]	Translation, ribosomal structure and biogenesis	Molecular Function: structural constituent of ribosome (GO:0003735);; Biological Process: translation (GO:0006412);; Cellular Component: cytosolic large ribosomal subunit (GO:0022625);;	K02880|7.11692e-129|oas:101115109|K02880 large subunit ribosomal protein L17e | (RefSeq) 60S ribosomal protein L17-like	Ribosome (ko03010)	[J]
gene5443	PREB	14.6075	1616	21.0756	2936	17.197	2891	18.8352	2576	20.7219	2282	17.9774	2851	20.1099	1621	21.4687	1748	16.9933	1364	24.1485	3957	22.9571	3130	21.258	2806	0.806607	0.151008	normal	0.740203	0.138441	normal	0.297108	0.329894	normal	0.953495	-0.0224844	normal	0.482792	-0.198084	normal	0.399932	-0.214447	normal	[R]	General function prediction only	Cellular Component: endoplasmic reticulum (GO:0005783);;	K14003|0|oas:101114090|K14003 prolactin regulatory element-binding protein | (RefSeq) PREB, CGREF1; prolactin regulatory element binding	Protein processing in endoplasmic reticulum (ko04141)	[U]
gene6038	SLC9A4	0.021143	7	0	0	0.033721	15	0	0	0.048525	14	0.05626	24	0.009784	2	0	0	0	0	0.02758	12	0.011299	5	0.014559	6	0.90277	0.0833665	normal	0.714658	-0.227057	normal	0.99912	0.00197565	normal	0.497015	-0.55056	normal	0.908054	0.124901	normal	0.528992	-0.408236	normal	[P]	Inorganic ion transport and metabolism	Biological Process: sodium ion transport (GO:0006814);; Biological Process: regulation of pH (GO:0006885);; Molecular Function: sodium:proton antiporter activity (GO:0015385);; Cellular Component: integral component of membrane (GO:0016021);; Biological Process: transmembrane transport (GO:0055085);;	K13961|0|oas:101109006|K13961 solute carrier family 9 (sodium/hydrogen exchanger), member 4 | (RefSeq) SLC9A4; solute carrier family 9 member A4	Gastric acid secretion (ko04971)	[P]
Ovis_aries_newGene_21775	--	5.59585	975	6.58606	1461	6.35152	1705	6.84737	1450	8.05601	1412	9.38495	2356	7.65582	958	6.6958	865	7.34767	934	7.12969	1860	8.32944	1816	6.63973	1404	0.125537	0.387814	normal	0.377866	0.204254	normal	0.549832	0.234627	normal	0.47949	-0.207652	normal	0.895075	0.144735	normal	0.900749	-0.0456566	normal	--	--	Molecular Function: nucleic acid binding (GO:0003676);; Molecular Function: phospholipid binding (GO:0005543);; Cellular Component: proteinaceous extracellular matrix (GO:0005578);; Cellular Component: mitochondrion (GO:0005739);; Cellular Component: plasma membrane (GO:0005886);; Cellular Component: fascia adherens (GO:0005916);; Biological Process: regulation of transcription, DNA-templated (GO…	--	--	--
gene7122	BCAT1	0.145962	33	0.15412	44	0.163819	56	0.062803	17	0.178798	40	0.090564	29	0.19863	32	0.189277	32	0.135577	22	0.198024	66	0.148816	42	0.130622	36	0.838992	-0.256736	normal	0.885089	0.128551	normal	0.989019	0.0291391	normal	0.598164	0.491749	normal	0.888295	-0.271944	normal	0.928008	0.0868306	normal	[EH]	Amino acid transport and metabolism;; Coenzyme transport and metabolism	Cellular Component: mitochondrion (GO:0005739);; Cellular Component: cytosol (GO:0005829);; Biological Process: branched-chain amino acid biosynthetic process (GO:0009082);; Biological Process: branched-chain amino acid catabolic process (GO:0009083);; Molecular Function: L-leucine transaminase activity (GO:0052654);; Molecular Function: L-valine transaminase activity (GO:0052655);; Molecular Fun…	K00826|0|chx:102174196|K00826 branched-chain amino acid aminotransferase [EC:2.6.1.42] | (RefSeq) BCAT1; branched chain amino acid transaminase 1	Cysteine and methionine metabolism (ko00270);; Valine, leucine and isoleucine degradation (ko00280);; Valine, leucine and isoleucine biosynthesis (ko00290);; Pantothenate and CoA biosynthesis (ko00770);; 2-Oxocarboxylic acid metabolism (ko01210);; Biosynthesis of amino acids (ko01230)	[E]
gene8809	BST-2B	1.65474	190	1.0551	175	1.32653	240	1.15464	171	1.71147	196	1.33587	234	4.43788	351	3.56264	243	3.41131	279	2.85515	478	2.9834	458	2.00469	274	0.947971	0.0585573	normal	2.29252e-05	1.18654	up	0.0223886	0.725932	normal	4.77117e-05	1.16017	up	0.03411	-0.705635	normal	0.464937	0.340527	normal	--	--	Biological Process: defense response to virus (GO:0051607);;	K06731|4.58161e-105|oas:100422801|K06731 bone marrow stromal cell antigen 2 | (RefSeq) BST-2B; bone marrow stromal cell antigen 2B	--	--
gene14035	LOC105613864	0.006747	3	0	0	0	0	0	0	0	0	0	0	0.009398	3	0.027314	7	0.275757	61	0	0	0	0	0	0	0.839625	-0.0595546	normal	0.164997	0.76304	normal	0.889302	-0.0477141	normal	0.0160362	1.66278	up	--	--	--	0.0557239	0.981811	normal	[V]	Defense mechanisms	Molecular Function: ATP binding (GO:0005524);; Cellular Component: integral component of membrane (GO:0016021);; Molecular Function: ATPase activity, coupled to transmembrane movement of substances (GO:0042626);;	K05673|0|oas:105613864|K05673 ATP-binding cassette, subfamily C (CFTR/MRP), member 4 | (RefSeq) multidrug resistance-associated protein 4-like	ABC transporters (ko02010);; cAMP signaling pathway (ko04024);; Bile secretion (ko04976)	[Q]
gene13659	LOC105610339	0	0	0	0	0	0	0	0	0	0	0	0	0	0	0	0	0	0	0	0	0	0	0	0	--	--	--	--	--	--	--	--	--	--	--	--	--	--	--	--	--	--	--	--	Biological Process: somitogenesis (GO:0001756);; Molecular Function: calcium ion binding (GO:0005509);; Cellular Component: plasma membrane (GO:0005886);; Biological Process: homophilic cell adhesion via plasma membrane adhesion molecules (GO:0007156);; Cellular Component: integral component of membrane (GO:0016021);; Biological Process: morphogenesis of embryonic epithelium (GO:0016331);;	K16499|5.43106e-179|oas:105610339|K16499 protocadherin delta 2 | (RefSeq) protocadherin-8-like	--	[S]
Ovis_aries_newGene_15790	--	0.267941	4	0	0	0	0	0	0	0	0	0.357521	7	0.115631	1	0	0	0	0	0	0	0	0	0	0	0.985443	0.00783737	normal	0.888884	-0.0626415	normal	0.889302	-0.0494838	normal	0.843073	-0.126792	normal	0.895075	0.0607449	normal	--	--	--	--	--	--	--	--	--
gene2121	BDH1	25.3344	2593	16.3725	2091	20.2745	3198	11.6954	1405	17.6255	1798	11.806	1733	25.2354	1799	15.7947	1146	18.7941	1392	11.5347	1737	14.9166	1889	12.557	1522	0.148275	-0.503427	normal	0.867326	-0.0941281	normal	0.0333415	-0.590503	normal	0.181594	0.457688	normal	0.944606	0.0833863	normal	0.0625653	0.542563	normal	[IQR]	Lipid transport and metabolism;; Secondary metabolites biosynthesis, transport and catabolism;; General function prediction only	Molecular Function: 3-hydroxybutyrate dehydrogenase activity (GO:0003858);; Cellular Component: nucleus (GO:0005634);; Cellular Component: mitochondrial inner membrane (GO:0005743);; Cellular Component: mitochondrial matrix (GO:0005759);; Biological Process: oxidation-reduction process (GO:0055114);;	K00019|0|oas:101104112|K00019 3-hydroxybutyrate dehydrogenase [EC:1.1.1.30] | (RefSeq) BDH1; 3-hydroxybutyrate dehydrogenase, type 1	Synthesis and degradation of ketone bodies (ko00072);; Butanoate metabolism (ko00650)	[QR]
gene10596	KLF3	27.0737	6760	28.0092	8902	26.7605	10345	24.707	7555	27.3789	6989	23.8703	8726	22.964	4116	21.2697	3936	25.0863	4592	26.4483	9906	25.3585	7970	24.8351	7531	0.845111	-0.0610413	normal	0.0912581	-0.253625	normal	0.805315	-0.0910346	normal	0.29807	-0.196667	normal	0.974486	0.0228756	normal	0.374645	-0.165654	normal	--	--	Molecular Function: nucleic acid binding (GO:0003676);; Molecular Function: metal ion binding (GO:0046872);;	K15605|0|oas:101111966|K15605 krueppel-like factor 3 | (RefSeq) KLF3; Kruppel like factor 3	Transcriptional misregulation in cancer (ko05202)	[R]
Ovis_aries_newGene_48324	--	0.154214	7	0.139994	9	0.764289	50	0.397149	18	0.475589	24	0.2728	17	0.155661	6	0.028713	2	0.047914	2	0.304457	18	0.159993	6	0	0	0.974295	0.0376848	normal	0.404769	-0.616413	normal	0.864301	-0.185409	normal	0.210244	-1.04234	normal	0.758329	0.290599	normal	0.945691	-0.0615316	normal	--	--	--	--	--	--
gene22091	CMTM7	10.8399	1027	9.94538	1128	10.2727	1415	8.65463	972	9.41173	881	9.84597	1411	17.0278	1096	10.6904	780	14.7376	840	11.2086	1557	8.86106	1027	10.1176	1150	0.911939	-0.0596635	normal	0.204884	0.36161	normal	0.99244	-0.0105258	normal	0.121402	0.425683	normal	0.957582	-0.0544362	normal	0.231103	0.365868	normal	--	--	Cellular Component: integral component of membrane (GO:0016021);;	--	--	[V]
gene986	CASQ2	1.43346	189	1.45146	243	1.34949	274	1.43154	229	1.1727	156	1.0713	203	1.49075	141	1.04706	102	0.927439	90	1.06044	210	0.951294	157	1.47894	237	0.839625	-0.146774	normal	0.608625	-0.274669	normal	0.85806	-0.220419	normal	0.84491	-0.127412	normal	0.96461	0.0758637	normal	0.967369	-0.0313679	normal	--	--	Biological Process: regulation of heart rate (GO:0002027);; Molecular Function: calcium ion binding (GO:0005509);; Molecular Function: protein binding (GO:0005515);; Cellular Component: voltage-gated calcium channel complex (GO:0005891);; Biological Process: regulation of cell communication by electrical coupling (GO:0010649);; Biological Process: regulation of cardiac muscle contraction by regul…	--	--	--
Ovis_aries_newGene_41140	--	0.243885	5	0	0	0.079974	3	0	0	0	0	0	0	0	0	0	0	0	0	0.078842	2	0.080432	2	0	0	0.826673	-0.0943938	normal	0.737703	-0.1568	normal	0.924647	-0.0589407	normal	--	--	--	0.895075	-0.0564824	normal	0.756356	-0.113752	normal	--	--	Cellular Component: cytoplasm (GO:0005737);; Biological Process: polyamine biosynthetic process (GO:0006596);; Biological Process: polyamine catabolic process (GO:0006598);; Biological Process: spermine metabolic process (GO:0008215);; Biological Process: spermidine metabolic process (GO:0008216);; Biological Process: putrescine metabolic process (GO:0009445);; Molecular Function: oxidoreductase …	--	--	--
gene7186	PDE6H	0	0	0.057496	4	0	0	0	0	0	0	0	0	0	0	0.150868	6	0	0	0	0	0	0	0	0	0.839625	-0.0602577	normal	0.895223	0.0613237	normal	0.889302	-0.048239	normal	0.692173	0.243831	normal	--	--	--	0.740546	0.137353	normal	--	--	Biological Process: activation of MAPK activity (GO:0000187);; Biological Process: visual perception (GO:0007601);; Molecular Function: cGMP binding (GO:0030553);; Biological Process: positive regulation of epidermal growth factor receptor signaling pathway (GO:0045742);; Biological Process: positive regulation of G-protein coupled receptor protein signaling pathway (GO:0045745);; Molecular Funct…	K13760|1.90764e-54|phd:102337190|K13760 retinal cone rhodopsin-sensitive cGMP 3',5'-cyclic phosphodiesterase subunit gamma | (RefSeq) PDE6H; phosphodiesterase 6H	Purine metabolism (ko00230)	--
gene25895	COG7	8.40998	1150	10.3771	1814	9.42365	1988	7.96834	1330	9.011	1244	9.98596	1972	10.1111	1003	9.1365	933	10.1716	1024	9.24109	1900	9.39313	1612	9.81994	1635	0.956563	-0.0331073	normal	0.881573	0.0510378	normal	0.989497	0.0133841	normal	0.779648	0.0817423	normal	0.951662	-0.0533124	normal	0.916383	0.0330286	normal	--	--	Cellular Component: Golgi membrane (GO:0000139);; Biological Process: protein glycosylation (GO:0006486);; Biological Process: intracellular protein transport (GO:0006886);; Biological Process: retrograde vesicle-mediated transport, Golgi to ER (GO:0006890);; Cellular Component: Golgi transport complex (GO:0017119);; Biological Process: protein localization to Golgi apparatus (GO:0034067);; Biolo…	K20294|0|oas:101104954|K20294 conserved oligomeric Golgi complex subunit 7 | (RefSeq) COG7; component of oligomeric golgi complex 7	--	[S]
gene14554	GGT6	1.0556	179	8.73396	1877	0.284245	74	9.69246	1989	9.54017	1620	0.074321	19	0.514525	63	0.203553	26	1.01601	126	1.33615	339	9.63974	2037	1.16147	238	0.888308	0.0945558	normal	0.292435	-0.683666	normal	0.981195	0.0298421	normal	0.144211	-1.13355	normal	0.951537	0.075923	normal	0.10502	-0.964834	normal	[E]	Amino acid transport and metabolism	Molecular Function: obsolete gamma-glutamyltransferase activity (GO:0003840);; Biological Process: glutathione biosynthetic process (GO:0006750);; Cellular Component: integral component of membrane (GO:0016021);; Molecular Function: glutathione hydrolase activity (GO:0036374);;	K00681|0|oas:101102912|K00681 gamma-glutamyltranspeptidase / glutathione hydrolase [EC:2.3.2.2 3.4.19.13] | (RefSeq) GGT6; gamma-glutamyltransferase 6	Taurine and hypotaurine metabolism (ko00430);; Glutathione metabolism (ko00480)	[E]
gene15270	LOC101102824	3.28024	583	2.7626	565	0.953416	329	2.74259	651	3.07221	605	2.81864	846	2.50581	333	2.89289	375	2.82721	404	2.78696	810	2.19328	577	1.75738	425	0.584258	0.374857	normal	0.740203	0.236033	normal	0.958975	0.0830615	normal	0.416603	-0.223678	normal	0.463489	0.332307	normal	0.755181	0.143009	normal	[KJ]	Transcription;; Translation, ribosomal structure and biogenesis	Cellular Component: mitochondrion (GO:0005739);;	K18189|0|oas:101102824|K18189 translational activator of cytochrome c oxidase 1 | (RefSeq) translational activator of cytochrome c oxidase 1	--	[S]
gene23408	LOC101119426	0.65143	17	0.203711	7	0.797656	32	0.533686	17	0.470201	13	0.373775	14	1.91574	36	0.264878	6	0.003585	1	0.520779	20	0.309669	10	0.064923	3	0.948481	-0.0761001	normal	0.888884	0.141219	normal	0.889302	-0.19659	normal	0.794028	0.298099	normal	0.895075	0.186262	normal	0.674453	0.366628	normal	--	--	--	K11252|6.75204e-60|lve:103082925|K11252 histone H2B | (RefSeq) histone H2B type 1-like	Alcoholism (ko05034);; Viral carcinogenesis (ko05203);; Systemic lupus erythematosus (ko05322)	[B]
gene18455	SYNGR4	0.157444	41	0.064204	22	0.183611	73	0.220703	69	0.158019	41	0.210252	78	0.132614	25	0.09515	19	0.136865	26	0.192176	75	0.156832	51	0.192765	61	0.768911	0.309826	normal	0.92042	-0.104986	normal	0.889302	0.213583	normal	0.375759	-0.603476	normal	0.959403	0.093813	normal	0.508281	-0.450435	normal	--	--	Cellular Component: integral component of membrane (GO:0016021);;	--	--	[TU]
gene3223	CCAR2	17.202	7182	18.4809	9868	18.4486	11846	15.6155	8363	21.3127	8418	19.6226	11998	19.8878	5901	17.3194	5832	16.1406	5120	19.038	12213	18.5305	9635	16.1907	8378	0.839625	0.0833455	normal	0.965532	0.0134106	normal	0.99244	0.00784106	normal	0.770049	-0.0761654	normal	0.914547	0.0686121	normal	0.995453	0.00169979	normal	--	--	Molecular Function: RNA polymerase II core binding (GO:0000993);; Molecular Function: enzyme inhibitor activity (GO:0004857);; Cellular Component: spliceosomal complex (GO:0005681);; Cellular Component: mitochondrial matrix (GO:0005759);; Biological Process: RNA splicing (GO:0008380);; Biological Process: regulation of DNA-templated transcription, elongation (GO:0032784);; Biological Process: pos…	--	--	--
gene3012	CDK20	4.42245	655	4.42933	693	5.64693	1050	3.84348	597	5.02044	645	4.30155	862	5.27151	499	4.25102	409	3.72984	347	4.23274	930	3.90389	677	5.13565	840	0.885028	-0.087112	normal	0.758791	-0.135858	normal	0.988863	-0.0182533	normal	0.919917	-0.0518972	normal	0.942415	-0.0742006	normal	0.788398	-0.12127	normal	[T]	Signal transduction mechanisms	Molecular Function: protein serine/threonine kinase activity (GO:0004674);; Molecular Function: ATP binding (GO:0005524);; Biological Process: protein phosphorylation (GO:0006468);;	K08817|0|phd:102317158|K08817 cell cycle related kinase [EC:2.7.11.22] | (RefSeq) CDK20; cyclin dependent kinase 20	--	[DKL]
gene2983	LOC101119277	0	0	0	0	0	0	0	0	0	0	0	0	0	0	0	0	0	0	0	0	0	0	0	0	--	--	--	--	--	--	--	--	--	--	--	--	--	--	--	--	--	--	--	--	Molecular Function: G-protein coupled receptor activity (GO:0004930);; Molecular Function: olfactory receptor activity (GO:0004984);; Cellular Component: plasma membrane (GO:0005886);; Biological Process: G-protein coupled receptor signaling pathway (GO:0007186);; Cellular Component: integral component of membrane (GO:0016021);; Biological Process: detection of chemical stimulus involved in senso…	K04257|0|oas:101119277|K04257 olfactory receptor | (RefSeq) olfactory receptor 13C8	Olfactory transduction (ko04740)	--
gene14188	LOC101121870	0	0	0	0	0	0	0	0	0	0	0	0	0	0	0	0	0	0	0	0	0	0	0	0	--	--	--	--	--	--	--	--	--	--	--	--	--	--	--	--	--	--	--	--	Molecular Function: phosphatidylcholine transporter activity (GO:0008525);; Biological Process: phospholipid transport (GO:0015914);; Molecular Function: phosphatidylcholine binding (GO:0031210);;	--	--	[I]
gene28287	MORF4L2	108.163	10426	96.1213	11766	103.71	15448	92.5716	10951	86.6448	8493	89.8103	12556	119.037	8268	141.036	10109	112.303	8010	94.2431	13661	106.356	12861	98.0065	11473	0.632428	-0.146309	normal	0.225386	0.260408	normal	0.950632	-0.0394023	normal	0.0265323	0.40667	normal	0.861029	-0.11297	normal	0.152382	0.296	normal	--	--	Cellular Component: nucleolus (GO:0005730);;	K11342|0|oas:101119883|K11342 mortality factor 4-like protein 2 | (RefSeq) MORF4L2; mortality factor 4 like 2	--	[BK]
Ovis_aries_newGene_68658	--	0.668325	15	0.165545	5	0.333069	11	0	0	0.260457	6	0.240876	11	0.19228	3	0.129412	3	0.592379	12	0.182849	6	0.092634	3	0.249757	7	0.842559	-0.141666	normal	0.976162	-0.0335259	normal	0.867574	-0.219687	normal	0.801323	0.27434	normal	0.988681	0.0213386	normal	0.736186	0.326611	normal	--	--	--	--	--	[R]
Ovis_aries_newGene_6754	--	0	0	0	0	0	0	0	0	0.074293	3	0	0	0	0	0	0	0.261797	7	0.137141	8	0.2804	13	0	0	0.839625	0.059862	normal	0.739708	0.144088	normal	0.78798	0.135045	normal	0.851556	0.124597	normal	0.895075	-0.107881	normal	0.917481	-0.0688209	normal	--	--	--	--	--	--
gene459	LRP8	0.439212	163	0.617933	278	0.549671	298	0.468095	204	0.669215	257	0.496548	257	0.679286	179	0.498137	137	0.46026	130	0.641258	340	0.671229	305	0.442239	197	0.93715	0.0716452	normal	0.916695	0.065599	normal	0.917856	0.111436	normal	0.982192	-0.0162224	normal	0.977899	-0.0474138	normal	0.927674	-0.0612914	normal	[G]	Carbohydrate transport and metabolism	Molecular Function: calcium ion binding (GO:0005509);; Cellular Component: caveola (GO:0005901);; Cellular Component: integral component of membrane (GO:0016021);; Biological Process: hippocampus development (GO:0021766);; Biological Process: layer formation in cerebral cortex (GO:0021819);; Molecular Function: very-low-density lipoprotein particle receptor activity (GO:0030229);; Biological Proc…	K20052|0|oas:101116697|K20052 low-density lipoprotein receptor-related protein 8 | (RefSeq) LRP8, apoer2; LDL receptor related protein 8	--	[T]
Ovis_aries_newGene_59526	--	0	0	0	0	0.201397	11	0	0	0	0	0	0	0	0	0	0	0	0	0	0	0	0	0	0	0.839625	-0.0655249	normal	0.740203	-0.135982	normal	0.889302	-0.0520718	normal	--	--	--	--	--	--	--	--	--	[X]	--	Molecular Function: nucleic acid binding (GO:0003676);; Molecular Function: RNA-directed DNA polymerase activity (GO:0003964);; Cellular Component: intracellular (GO:0005622);; Cellular Component: fascia adherens (GO:0005916);; Biological Process: RNA-dependent DNA biosynthetic process (GO:0006278);; Biological Process: regulation of transcription, DNA-templated (GO:0006355);; Molecular Function:…	K09228|1.59779e-47|oas:100527962|K09228 KRAB domain-containing zinc finger protein | (RefSeq) ZNF33B; zinc finger protein 33B	--	[R]
Ovis_aries_newGene_15613	--	0.076805	5	0.099448	8	0.299885	29	0.03446	3	0.127676	9	0.018801	2	0.067142	4	0.043364	3	0.043319	2	0.063998	7	0.037828	3	0.129902	10	0.774026	-0.248541	normal	0.581728	-0.471441	normal	0.889302	-0.199726	normal	0.987796	-0.0214955	normal	0.976553	-0.0480237	normal	0.919676	-0.10578	normal	--	--	--	K10838|4.8499e-06|oas:101109650|K10838 xeroderma pigmentosum group C-complementing protein | (RefSeq) XPC; XPC complex subunit, DNA damage recognition and repair factor	Nucleotide excision repair (ko03420)	--
gene27722	RGAG4	5.33698	740	6.95374	1297	7.73787	1671	4.99879	714	7.10518	891	5.91626	1234	6.8635	616	7.77433	751	9.00122	882	7.16544	1314	5.43177	868	6.40414	1035	0.721545	-0.230755	normal	0.854982	0.0914955	normal	0.824851	-0.201777	normal	0.31513	0.343831	normal	0.979555	-0.0357666	normal	0.350599	0.306022	normal	--	--	--	--	--	--
gene13838	LOC105616258	0	0	0	0	0	0	0	0	0	0	0	0	0	0	0	0	0	0	0	0	0	0	0	0	--	--	--	--	--	--	--	--	--	--	--	--	--	--	--	--	--	--	[R]	General function prediction only	--	--	--	--
gene14423	SEZ6	0.177426	35	0.331347	43	0.287115	54	0.591247	85	0.14232	28	0.26334	74	0.198878	28	0.226227	28	0.00705	2	0.203166	60	0.310238	60	0.255329	61	0.739954	0.329316	normal	0.850464	-0.192739	normal	0.841075	0.27516	normal	0.574346	-0.58778	normal	0.967263	0.0860109	normal	0.679879	-0.39969	normal	--	--	Cellular Component: extracellular space (GO:0005615);; Cellular Component: plasma membrane (GO:0005886);; Cellular Component: integral component of membrane (GO:0016021);; Cellular Component: dendritic spine (GO:0043197);; Cellular Component: dendritic shaft (GO:0043198);; Biological Process: excitatory postsynaptic potential (GO:0060079);; Biological Process: positive regulation of dendrite deve…	--	--	--
gene17572	CRISPLD2	54.291	4778	39.164	4388	48.5347	6580	35.8751	3837	55.2887	4895	39.8095	5049	54.7197	3457	49.9089	3255	49.0787	3166	54.5529	7200	43.2137	4760	45.3514	4846	0.905625	-0.0839097	normal	0.780601	0.0957129	normal	0.993271	0.0106468	normal	0.578824	0.184644	normal	0.91128	-0.101407	normal	0.780957	0.0808627	normal	[S]	Function unknown	Cellular Component: extracellular region (GO:0005576);; Molecular Function: heparin binding (GO:0008201);; Cellular Component: transport vesicle (GO:0030133);; Biological Process: extracellular matrix organization (GO:0030198);; Cellular Component: extracellular matrix (GO:0031012);;	--	--	[S]
gene755	LOC101116368	0.01948	4	0.007701	2	0.018081	5	0.021369	5	0.012824	3	0.009011	3	0.029485	4	0	0	0.017717	3	0.012757	3	0.007609	2	0	0	0.987608	0.0163483	normal	0.980762	0.0234967	normal	0.889302	-0.108387	normal	0.997355	0.00443224	normal	0.895075	0.135613	normal	0.785516	0.163869	normal	[IQ]	Lipid transport and metabolism;; Secondary metabolites biosynthesis, transport and catabolism	--	K13510|0|oas:101116368|K13510 lysophosphatidylcholine acyltransferase / lyso-PAF acetyltransferase [EC:2.3.1.23 2.3.1.67] | (RefSeq) lysophosphatidylcholine acyltransferase 2B-like	Glycerophospholipid metabolism (ko00564);; Ether lipid metabolism (ko00565)	[I]
gene21995	EXOC3L4	0.283707	28	0.452752	56	0.532369	80	0.80095	95	0.435018	43	0.791099	111	0.54057	38	0.709862	51	0.518447	37	0.743121	108	0.643762	78	0.624449	74	0.547041	0.437152	normal	0.652275	0.354685	normal	0.567136	0.41969	normal	0.78198	-0.223046	normal	0.985408	0.0368162	normal	0.80906	-0.168089	normal	--	--	Cellular Component: exocyst (GO:0000145);; Biological Process: exocytosis (GO:0006887);;	--	--	[U]
gene17198	FAM83C	16.6719	2844	11.4453	2525	13.3458	3919	23.4131	4846	16.2477	3115	15.7009	4312	11.3215	1549	9.50914	1343	8.65046	1208	17.4488	4986	15.8981	3791	19.9375	4612	0.182369	0.432791	normal	0.171024	-0.387507	normal	0.15785	0.415123	normal	0.000112925	-0.870237	normal	0.993097	0.0129736	normal	1.76312e-05	-0.840731	normal	--	--	--	--	--	--
gene11262	FEM1B	16.618	5561	17.768	7570	16.3252	8416	15.7388	6402	16.5636	5576	15.0931	7279	13.2034	3172	16.1878	4015	18.1462	4451	15.906	7983	16.4808	6903	16.6119	6750	0.839625	-0.0664519	normal	0.752469	-0.104522	normal	0.918351	-0.0467166	normal	0.906172	-0.0435281	normal	0.969694	-0.0264762	normal	0.86544	-0.0619836	normal	[T]	Signal transduction mechanisms	Molecular Function: ubiquitin-protein transferase activity (GO:0004842);; Cellular Component: nucleus (GO:0005634);; Cellular Component: cytoplasm (GO:0005737);; Biological Process: regulation of apoptotic process (GO:0042981);; Biological Process: regulation of ubiquitin-protein transferase activity (GO:0051438);; Biological Process: branching involved in prostate gland morphogenesis (GO:0060442…	K10349|0|oas:101113243|K10349 Fem-1 homolog b | (RefSeq) FEM1B; fem-1 homolog B	--	[R]
gene21015	SDS	1.71234	148	1.31216	141	1.53401	201	0.696432	70	0.930203	77	1.84466	227	4.98404	298	3.63442	235	3.78508	231	4.30216	540	3.53579	370	2.96287	304	0.834894	-0.249925	normal	6.2507e-07	1.30669	up	4.02872e-05	1.00956	up	0.000263309	1.57553	up	0.00378571	-1.07602	down	0.740546	0.174931	normal	[E]	Amino acid transport and metabolism	Molecular Function: L-serine ammonia-lyase activity (GO:0003941);; Molecular Function: L-threonine ammonia-lyase activity (GO:0004794);; Cellular Component: mitochondrion (GO:0005739);; Biological Process: gluconeogenesis (GO:0006094);; Biological Process: L-serine catabolic process (GO:0006565);; Molecular Function: pyridoxal phosphate binding (GO:0030170);; Molecular Function: protein homodimer…	K17989|0|oas:101112348|K17989 L-serine/L-threonine ammonia-lyase [EC:4.3.1.17 4.3.1.19] | (RefSeq) SDS; serine dehydratase	Glycine, serine and threonine metabolism (ko00260);; Cysteine and methionine metabolism (ko00270);; Valine, leucine and isoleucine biosynthesis (ko00290);; Carbon metabolism (ko01200);; Biosynthesis of amino acids (ko01230)	[E]
gene8205	C4H7orf25	0.065449	9	0.092358	17	0.064299	14	0.025819	5	0.081054	12	0.075954	16	0.037404	4	0	0	0.120155	13	0.050189	11	0.088003	16	0.078305	14	0.955592	-0.0659818	normal	0.893822	-0.132758	normal	0.999546	0.00201647	normal	0.945484	-0.0970742	normal	0.973775	-0.0676167	normal	0.890549	-0.131845	normal	--	--	--	--	--	[S]
gene24413	NPAS4	0.006037	1	0.188572	29	0.032134	6	0.020931	4	0.016739	3	0.088564	16	0.140727	13	0.131479	12	0.091814	9	0.038246	7	0.02018	4	0.027689	5	0.905353	-0.101498	normal	0.780897	0.249083	normal	0.889302	-0.165008	normal	0.436194	0.748827	normal	0.932286	0.116542	normal	0.139143	0.936652	normal	--	--	Molecular Function: DNA binding (GO:0003677);; Molecular Function: signal transducer activity (GO:0004871);; Cellular Component: nucleus (GO:0005634);; Cellular Component: transcription factor complex (GO:0005667);; Biological Process: signal transduction (GO:0007165);; Biological Process: positive regulation of transcription from RNA polymerase II promoter (GO:0045944);; Molecular Function: prot…	--	--	--
gene11879	SCG3	0.140156	17	0.052952	8	0.248973	45	0.078029	11	0.15316	18	0.23784	40	0.619896	52	0.574867	49	0.545788	46	0.398393	67	0.357466	52	0.234714	32	0.983502	0.0271523	normal	0.0262002	1.22561	up	0.609272	0.404386	normal	0.0120028	1.44561	up	0.55267	-0.479518	normal	0.217163	0.656801	normal	--	--	Cellular Component: extracellular region (GO:0005576);; Cellular Component: transport vesicle membrane (GO:0030658);;	--	--	--
Ovis_aries_newGene_33456	--	0	0	0.364858	25	0.031102	3	0.171176	12	0	0	0.267809	21	0.084887	4	0.223917	9	0	0	0.291468	24	0.022518	2	0.033957	3	0.978687	0.0202004	normal	0.95971	-0.0434504	normal	0.994311	-0.00945429	normal	0.906313	-0.137128	normal	0.977544	0.0400196	normal	0.966175	-0.038557	normal	--	--	Biological Process: protein peptidyl-prolyl isomerization (GO:0000413);; Molecular Function: peptidyl-prolyl cis-trans isomerase activity (GO:0003755);; Molecular Function: FK506 binding (GO:0005528);; Cellular Component: endoplasmic reticulum membrane (GO:0005789);; Biological Process: chaperone-mediated protein folding (GO:0061077);;	--	--	--
gene7388	MRPL51	17.4139	2080	15.0241	2337	14.6951	2843	12.9847	1984	14.0097	1920	13.9635	2331	11.5697	1319	13.6245	1091	10.22	1084	13.6445	2441	11.0429	2200	14.0874	2071	0.773347	-0.126138	normal	0.241345	-0.274119	normal	0.623684	-0.168723	normal	0.616769	-0.15153	normal	0.965086	0.0363009	normal	0.740997	-0.106606	normal	--	--	Molecular Function: structural constituent of ribosome (GO:0003735);; Cellular Component: mitochondrial large ribosomal subunit (GO:0005762);; Biological Process: translation (GO:0006412);;	K17432|4.80571e-88|oas:101113486|K17432 large subunit ribosomal protein L51 | (RefSeq) MRPL51; mitochondrial ribosomal protein L51	--	[S]
gene7062	METTL20	2.26208	199	1.66327	201	2.82867	404	1.73672	210	1.79899	183	1.48814	222	2.47425	181	2.40301	162	2.30827	162	2.13457	299	2.404	301	2.34855	265	0.81481	-0.211481	normal	0.824169	0.1296	normal	0.95952	0.0696873	normal	0.277046	0.37892	normal	0.545389	-0.310386	normal	0.927323	0.048463	normal	[R]	General function prediction only	Cellular Component: cytoplasm (GO:0005737);; Biological Process: protein methylation (GO:0006479);; Molecular Function: protein methyltransferase activity (GO:0008276);;	--	--	--
Ovis_aries_newGene_4871	--	2.01422	134	3.95866	446	4.24614	565	2.47855	278	2.9486	283	2.61134	253	3.34203	231	2.61432	154	3.1146	147	2.08273	282	3.96469	413	1.89494	199	0.839625	-0.195244	normal	0.806986	-0.190156	normal	0.889302	-0.186756	normal	0.95563	0.0424473	normal	0.993748	0.0189534	normal	0.935843	0.0668553	normal	[R]	General function prediction only	--	K09228|4.66986e-155|phd:102341651|K09228 KRAB domain-containing zinc finger protein | (RefSeq) ZNF729; zinc finger protein 729	--	[R]
gene26784	GDF10	1.0607	135	0.624083	101	0.615805	121	1.60797	249	1.19006	153	1.6054	294	0.373037	35	0.106676	11	1.20793	113	0.954871	182	1.03148	164	1.20573	186	0.0607331	0.737537	normal	0.792591	-0.248822	normal	0.683549	0.341751	normal	0.16433	-1.02067	normal	0.452436	0.409621	normal	0.519802	-0.527447	normal	--	--	Molecular Function: cytokine activity (GO:0005125);; Cellular Component: extracellular space (GO:0005615);; Molecular Function: growth factor activity (GO:0008083);; Biological Process: growth (GO:0040007);;	K05496|0|oas:101115678|K05496 bone morphogenetic protein 3/3B | (RefSeq) GDF10; growth differentiation factor 10	--	[T]
Ovis_aries_newGene_64672	--	0.092601	5	0.226513	13	0	0	0.148271	8	0.069707	4	0.056958	4	0	0	0.250682	9	0.038711	2	0.113521	8	0.218021	13	0.03756	3	0.983675	-0.0184845	normal	0.996305	-0.00466853	normal	0.981371	0.0287473	normal	0.979798	0.0337585	normal	0.956497	-0.0869786	normal	0.945402	-0.0643557	normal	--	--	--	--	--	--
gene22600	LOC101115913	0	0	0	0	0	0	0	0	0	0	0	0	0	0	0.063136	4	0	0	0	0	0	0	0.042698	5	--	--	--	0.739708	0.138415	normal	0.889302	0.0494981	normal	0.693796	0.235527	normal	0.895075	-0.0590502	normal	0.97187	0.0164362	normal	[O]	Posttranslational modification, protein turnover, chaperones	Molecular Function: serine-type endopeptidase activity (GO:0004252);; Cellular Component: extracellular region (GO:0005576);; Biological Process: proteolysis (GO:0006508);;	--	--	[E]
gene25080	LOC105612436	2.25398	401	2.66053	603	2.81933	773	2.84344	615	2.67297	479	2.54825	654	3.23387	413	2.64635	349	1.6308	213	2.38655	637	3.50623	781	1.98437	429	0.889355	0.0833064	normal	0.942447	-0.0513817	normal	0.989725	0.0215823	normal	0.793835	-0.144424	normal	0.976209	0.048988	normal	0.923717	-0.0746474	normal	--	--	--	--	--	[BD]
gene8120	HOXA3	3.41311	630	2.12245	530	3.77899	1092	2.05327	523	3.14358	622	2.33506	585	2.1342	290	2.62583	360	2.24344	265	3.3647	865	2.39539	573	2.42449	618	0.821407	-0.205412	normal	0.244132	-0.457229	normal	0.889302	-0.152629	normal	0.584869	-0.246157	normal	0.963399	-0.0623287	normal	0.377989	-0.303866	normal	--	--	Biological Process: angiogenesis (GO:0001525);; Biological Process: blood vessel remodeling (GO:0001974);; Molecular Function: transcription factor activity, sequence-specific DNA binding (GO:0003700);; Cellular Component: nucleus (GO:0005634);; Biological Process: regulation of transcription, DNA-templated (GO:0006355);; Biological Process: positive regulation of cell proliferation (GO:0008284);…	K09303|0|oas:101115026|K09303 homeobox protein HoxA/B/D3 | (RefSeq) HOXA3; homeobox A3	--	[R]
gene4417	UNC80	0.011648	9	0.037546	34	0.0158	17	0.021181	18	0.025531	18	0.013982	14	0.010018	5	0.015508	8	0.015891	9	0.008683	10	0.015107	14	0.002984	3	0.97011	-0.0458093	normal	0.740203	-0.32339	normal	0.770466	-0.290518	normal	0.74539	-0.342369	normal	0.787417	0.322443	normal	0.809221	0.224662	normal	--	--	--	--	--	--
gene10097	GABRB2	0.021639	9	0.055167	27	0.031521	19	0.061556	28	0.21375	81	0.069858	38	0	0	0.027545	8	0.119612	33	0.039627	23	0.08529	40	0.132246	60	0.235542	0.637664	normal	0.91545	0.107445	normal	0.567542	0.422685	normal	0.609447	-0.560079	normal	0.913189	0.166103	normal	0.768987	-0.250851	normal	[X]	--	Molecular Function: GABA-A receptor activity (GO:0004890);; Molecular Function: extracellular ligand-gated ion channel activity (GO:0005230);; Molecular Function: chloride channel activity (GO:0005254);; Cellular Component: plasma membrane (GO:0005886);; Biological Process: ion transport (GO:0006811);; Biological Process: sensory perception of sound (GO:0007605);; Cellular Component: cell junctio…	K05181|0|phd:102327351|K05181 gamma-aminobutyric acid receptor subunit beta | (RefSeq) GABRB2; gamma-aminobutyric acid type A receptor beta2 subunit	Neuroactive ligand-receptor interaction (ko04080);; Retrograde endocannabinoid signaling (ko04723);; Serotonergic synapse (ko04726);; GABAergic synapse (ko04727);; Morphine addiction (ko05032);; Nicotine addiction (ko05033)	[T]
gene24809	FBXL15	1.77194	133	1.95523	186	1.35699	157	1.64099	149	1.70441	128	1.56551	169	1.00659	54	1.19711	67	1.5209	84	1.56504	176	1.70576	160	1.99057	150	0.986322	-0.0183148	normal	0.468873	-0.396433	normal	0.982216	-0.0349469	normal	0.432502	-0.404326	normal	0.994414	0.0127709	normal	0.474973	-0.367189	normal	--	--	Biological Process: G2/M transition of mitotic cell cycle (GO:0000086);; Molecular Function: ubiquitin-protein transferase activity (GO:0004842);; Cellular Component: cytoplasm (GO:0005737);; Biological Process: dorsal/ventral pattern formation (GO:0009953);; Biological Process: protein ubiquitination (GO:0016567);; Cellular Component: SCF ubiquitin ligase complex (GO:0019005);; Biological Proces…	K10281|1.6035e-109|oas:101114741|K10281 F-box and leucine-rich repeat protein 15 | (RefSeq) FBXL15; F-box and leucine rich repeat protein 15	--	[R]
Ovis_aries_newGene_15285	--	0.305177	110	0.29083	147	0.763723	288	0.324702	176	0.354207	159	0.564442	131	0.48328	59	1.121	159	0.313695	103	0.276841	185	0.503254	175	0.878609	163	0.979251	-0.0313186	normal	0.953338	0.056784	normal	0.980445	-0.0424923	normal	0.92369	0.0923643	normal	0.998663	0.0026955	normal	0.910375	0.0978958	normal	--	--	Molecular Function: nucleic acid binding (GO:0003676);; Molecular Function: actin binding (GO:0003779);; Molecular Function: RNA-directed DNA polymerase activity (GO:0003964);; Cellular Component: mitochondrion (GO:0005739);; Cellular Component: adherens junction (GO:0005912);; Biological Process: RNA-dependent DNA biosynthetic process (GO:0006278);; Molecular Function: serine-type peptidase acti…	--	--	--
Ovis_aries_newGene_67915	--	0.292823	47	0.513265	103	0.842951	166	0.596398	114	1.2757	170	0.879081	174	0.863323	99	0.223461	28	1.2263	120	0.503478	106	0.777547	148	0.498056	96	0.437383	0.481582	normal	0.731706	0.335314	normal	0.944931	0.108257	normal	0.860247	-0.174973	normal	0.664238	0.379174	normal	0.805243	0.216021	normal	--	--	Molecular Function: ion channel activity (GO:0005216);; Molecular Function: binding (GO:0005488);; Biological Process: anion transport (GO:0006820);; Biological Process: cellular component assembly (GO:0022607);; Cellular Component: cell junction (GO:0030054);; Biological Process: positive regulation of cellular protein metabolic process (GO:0032270);; Biological Process: regulation of localizati…	--	--	--
Ovis_aries_newGene_40144	--	0	0	0	0	0.405601	442	0	0	0	0	0	0	0	0	0	0	0	0	0	0	0	0	0	0	0.839625	-0.070235	normal	0.737733	-0.151954	normal	0.889302	-0.0554082	normal	--	--	--	--	--	--	--	--	--	--	--	Molecular Function: trace-amine receptor activity (GO:0001594);; Molecular Function: RNA-directed DNA polymerase activity (GO:0003964);; Cellular Component: proteinaceous extracellular matrix (GO:0005578);; Cellular Component: cytoplasm (GO:0005737);; Cellular Component: plasma membrane (GO:0005886);; Biological Process: RNA-dependent DNA biosynthetic process (GO:0006278);; Biological Process: G-…	K08111|2.95701e-13|bom:102284894|K08111 glypican 5 | (RefSeq) GPC5, Glypican-5; glypican 5	--	--
Ovis_aries_newGene_32081	--	0	0	0.07781	1	0.19986	4	0	0	0.225572	3	0.27402	4	0	0	0	0	0	0	0.064264	1	0	0	0	0	0.941862	0.0424352	normal	0.748514	-0.122347	normal	0.911044	-0.0455187	normal	0.696	-0.226367	normal	0.895075	0.085739	normal	--	--	--	--	--	--	--	--	--
Ovis_aries_newGene_41593	--	0.336739	19	0.191238	14	0.49673	42	0.650058	45	0.335313	19	0.813918	65	0.431229	17	0.447248	19	0.895431	37	0.357373	30	0.322463	23	0.212001	15	0.643571	0.393325	normal	0.572213	0.483578	normal	0.967722	-0.0713018	normal	0.961011	-0.0615042	normal	0.524298	0.495148	normal	0.398243	0.61168	normal	--	--	--	--	--	--
gene1409	ETV3	18.5018	3931	21.5194	6013	17.4895	6190	17.9324	4974	16.6211	3698	16.5839	5441	20.3207	2445	17.473	2893	17.5248	2040	16.9611	4921	18.4279	5153	17.38	4733	0.839625	-0.0974263	normal	0.221274	-0.328267	normal	0.840776	-0.151865	normal	0.415807	-0.23896	normal	0.958119	0.0507311	normal	0.6622	-0.174372	normal	--	--	Biological Process: negative regulation of transcription from RNA polymerase II promoter (GO:0000122);; Molecular Function: transcription factor activity, sequence-specific DNA binding (GO:0003700);; Cellular Component: transcriptional repressor complex (GO:0017053);; Molecular Function: sequence-specific DNA binding (GO:0043565);;	K09433|0|oas:101108528|K09433 ETS translocation variant 3 | (RefSeq) ETV3; ETS variant 3	--	[K]
gene2769	ERG	9.98142	921	6.84973	464	15.842	2103	7.12051	449	6.99523	346	9.95587	1363	10.5528	453	15.0705	913	8.06953	299	9.76223	788	13.9557	1541	13.1379	1327	0.67522	-0.371418	normal	0.850672	-0.170201	normal	0.974325	0.060794	normal	0.692173	0.3387	normal	0.539204	-0.472162	normal	0.740997	-0.268501	normal	--	--	Molecular Function: transcription factor activity, sequence-specific DNA binding (GO:0003700);; Cellular Component: nucleus (GO:0005634);; Biological Process: regulation of transcription, DNA-templated (GO:0006355);; Cellular Component: intracellular ribonucleoprotein complex (GO:0030529);; Molecular Function: sequence-specific DNA binding (GO:0043565);;	K09435|0|oas:101110646|K09435 transcriptional regulator ERG | (RefSeq) ERG; ERG, ETS transcription factor	Transcriptional misregulation in cancer (ko05202)	[K]
gene23673	HIVEP1	2.98586	1630	5.52349	2361	5.28709	2636	4.82765	1771	5.57882	1830	4.82282	1869	4.79891	1136	2.80022	1078	3.87054	865	4.77134	2256	3.77156	1544	3.3033	1200	0.799991	-0.147344	normal	0.218027	-0.305114	normal	0.133502	-0.429399	normal	0.689105	-0.157115	normal	0.621144	0.279641	normal	0.740997	0.151376	normal	--	--	Biological Process: negative regulation of transcription from RNA polymerase II promoter (GO:0000122);; Molecular Function: DNA binding (GO:0003677);; Cellular Component: nucleus (GO:0005634);; Molecular Function: metal ion binding (GO:0046872);;	K09239|0|oas:101115835|K09239 human immunodeficiency virus type I enhancer-binding protein | (RefSeq) HIVEP1; human immunodeficiency virus type I enhancer binding protein 1	--	[R]
gene23479	LOC101106041	0	0	0.222515	8	0.202688	8	1.96107	61	0.395742	11	0.683977	26	0.05501	2	0.319754	7	0.43104	9	0.19608	8	0.757282	25	0.606052	19	0.216513	0.559192	normal	0.744627	0.267801	normal	0.695019	0.276899	normal	0.253966	-0.974263	normal	0.825286	0.300169	normal	0.744989	-0.305221	normal	--	--	Cellular Component: nucleosome (GO:0000786);; Molecular Function: DNA binding (GO:0003677);; Cellular Component: nucleus (GO:0005634);; Biological Process: nucleosome assembly (GO:0006334);; Molecular Function: protein heterodimerization activity (GO:0046982);;	K11252|5.99051e-60|lve:103086798|K11252 histone H2B | (RefSeq) histone H2B type 1-K-like	Alcoholism (ko05034);; Viral carcinogenesis (ko05203);; Systemic lupus erythematosus (ko05322)	[B]
gene21629	CPLX3	0.014049	3	0.006743	2	0	0	0	0	0	0	0.05348	12	0	0	0	0	0	0	0	0	0.011224	3	0.02314	5	0.93992	0.037661	normal	0.74299	-0.128162	normal	0.97446	0.0267575	normal	0.694031	-0.236664	normal	0.984546	0.0164851	normal	0.740546	-0.143511	normal	--	--	Molecular Function: neurotransmitter transporter activity (GO:0005326);; Cellular Component: cytosol (GO:0005829);; Cellular Component: plasma membrane (GO:0005886);; Biological Process: synaptic vesicle exocytosis (GO:0016079);; Molecular Function: syntaxin binding (GO:0019905);; Cellular Component: cell junction (GO:0030054);; Biological Process: insulin secretion (GO:0030073);; Cellular Compon…	K15295|1.84615e-102|oas:101108426|K15295 complexin-3/4 | (RefSeq) CPLX3; complexin 3	Synaptic vesicle cycle (ko04721)	--
gene16475	ELF3	1.24512	131	3.97748	506	1.92037	281	2.22601	265	2.41507	254	2.50441	357	1.50562	109	2.02091	154	2.07945	151	2.63705	368	3.23266	401	3.76406	432	0.982448	0.0282817	normal	0.740203	-0.269155	normal	0.889302	0.229026	normal	0.332671	-0.372518	normal	0.634997	-0.295023	normal	0.0613347	-0.654932	normal	--	--	Biological Process: blastocyst development (GO:0001824);; Molecular Function: transcription factor activity, sequence-specific DNA binding (GO:0003700);; Molecular Function: transcription coactivator activity (GO:0003713);; Cellular Component: nucleus (GO:0005634);; Cellular Component: Golgi apparatus (GO:0005794);; Biological Process: inflammatory response (GO:0006954);; Biological Process: extr…	K09429|0|oas:101104676|K09429 E74-like factor 3 | (RefSeq) ELF3; E74 like ETS transcription factor 3	--	[K]
gene4010	LRP2	8.45882	6509	14.8139	15564	9.23758	10954	7.41068	6881	8.61054	6616	7.6057	9261	4.20808	2553	6.56813	3960	5.49305	3402	8.92587	11310	5.50074	5431	6.26176	5851	0.41434	-0.376321	normal	0.00914486	-0.854599	normal	0.323582	-0.480397	normal	0.0330518	-0.496017	normal	0.895075	0.159756	normal	0.5348	-0.291616	normal	[G]	Carbohydrate transport and metabolism	Molecular Function: calcium ion binding (GO:0005509);; Cellular Component: endosome (GO:0005768);; Cellular Component: endoplasmic reticulum (GO:0005783);; Cellular Component: Golgi apparatus (GO:0005794);; Cellular Component: clathrin-coated pit (GO:0005905);; Biological Process: vitamin metabolic process (GO:0006766);; Biological Process: receptor-mediated endocytosis (GO:0006898);; Biological …	K06233|0|oas:101108200|K06233 low density lipoprotein-related protein 2 | (RefSeq) LRP2; LDL receptor related protein 2	Hedgehog signaling pathway (ko04340);; Thyroid hormone synthesis (ko04918)	[T]
gene11853	RAB27A	16.1094	2617	14.303	3031	16.424	4035	10.5641	2155	8.58866	1409	10.252	2474	24.476	3047	21.5233	2548	26.1304	3087	13.6176	3343	19.5916	3976	16.713	3337	0.00439017	-0.565255	normal	7.70234e-05	0.612213	normal	0.903694	0.0913068	normal	3.87836e-10	1.19693	up	0.0116752	-0.638154	normal	0.0374562	0.499002	normal	[R]	General function prediction only	Cellular Component: photoreceptor outer segment (GO:0001750);; Molecular Function: GTPase activity (GO:0003924);; Molecular Function: GTP binding (GO:0005525);; Cellular Component: lysosome (GO:0005764);; Cellular Component: Golgi apparatus (GO:0005794);; Biological Process: obsolete GTP catabolic process (GO:0006184);; Biological Process: protein targeting (GO:0006605);; Biological Process: smal…	K07885|1.29377e-164|oas:101122791|K07885 Ras-related protein Rab-27A | (RefSeq) RAB27A; RAB27A, member RAS oncogene family	--	[U]
Ovis_aries_newGene_44788	--	0.128306	25	0.302382	73	0.162885	48	0.20136	47	0.297607	57	0.336564	92	0.029786	5	0.043139	7	0.09462	14	0.169044	48	0.076027	18	0.129734	30	0.781281	0.298523	normal	0.11457	-0.980074	normal	0.827641	-0.299991	normal	0.00620018	-1.64568	down	0.231611	0.668146	normal	0.496711	-0.551118	normal	--	--	Biological Process: positive regulation of natural killer cell mediated cytotoxicity directed against tumor cell target (GO:0002860);; Molecular Function: receptor activity (GO:0004872);; Molecular Function: receptor binding (GO:0005102);; Cellular Component: integral component of plasma membrane (GO:0005887);; Cellular Component: cell-cell adherens junction (GO:0005913);; Biological Process: org…	--	--	--
gene16757	RIN2	23.0919	5114	24.3313	7502	25.1544	9322	29.6883	8342	27.7095	6719	27.0832	9379	25.7987	3799	20.771	3440	23.6671	3876	26.0055	9139	23.873	7072	27.0237	7905	0.227346	0.253476	normal	0.417695	-0.176401	normal	0.889302	0.0942308	normal	0.00213967	-0.443194	normal	0.709961	0.151359	normal	0.122961	-0.278158	normal	--	--	Biological Process: signal transduction (GO:0007165);;	--	--	[U]
gene17373	SLC35C2	5.74908	601	6.69602	962	5.63613	965	6.54655	802	7.91021	627	8.56372	1297	10.072	733	6.4618	517	8.33593	599	7.00615	1123	7.34322	924	6.36034	806	0.839625	0.150797	normal	0.338316	0.319453	normal	0.889302	0.108612	normal	0.725404	0.156315	normal	0.976209	0.0411397	normal	0.586971	0.205857	normal	--	--	Cellular Component: endoplasmic reticulum-Golgi intermediate compartment (GO:0005793);; Cellular Component: cis-Golgi network (GO:0005801);; Biological Process: negative regulation of gene expression (GO:0010629);; Cellular Component: integral component of membrane (GO:0016021);; Biological Process: protein O-linked fucosylation (GO:0036066);; Biological Process: positive regulation of Notch sign…	K15280|0|oas:101117780|K15280 solute carrier family 35, member C2 | (RefSeq) SLC35C2; solute carrier family 35 member C2	--	[S]
gene27620	LOC101114591	0	0	0	0	0	0	0	0	0	0	0	0	0	0	0	0	0	0	0	0	0	0	0	0	--	--	--	--	--	--	--	--	--	--	--	--	--	--	--	--	--	--	[R]	General function prediction only	Molecular Function: nucleic acid binding (GO:0003676);; Cellular Component: intracellular (GO:0005622);; Biological Process: regulation of transcription, DNA-templated (GO:0006355);; Molecular Function: metal ion binding (GO:0046872);;	K09228|0|oas:101114591|K09228 KRAB domain-containing zinc finger protein | (RefSeq) ZNF630; zinc finger protein 630	--	[R]
gene7557	ZC3H7B	12.7681	2486	12.4131	3023	13.6672	4002	13.7227	3131	12.5578	2461	12.4942	3564	11.5332	1553	11.245	1578	11.4582	1632	14.3594	4037	11.9655	3058	13.4736	3194	0.932653	0.0367619	normal	0.169105	-0.206648	normal	0.905575	0.0572561	normal	0.137008	-0.249515	normal	0.973388	-0.0272157	normal	0.0697105	-0.26899	normal	--	--	Molecular Function: metal ion binding (GO:0046872);;	--	--	--
gene4964	NELFB	12.8556	684	8.63552	599	9.17651	780	8.13551	549	7.19301	402	8.80434	706	11.3693	452	8.30121	340	5.98629	242	9.57584	809	12.7549	859	7.92247	546	0.681336	-0.241732	normal	0.737703	-0.216748	normal	0.99464	0.0119605	normal	0.969602	0.0263681	normal	0.729171	-0.257729	normal	0.715833	-0.230341	normal	--	--	Cellular Component: cytoplasm (GO:0005737);; Cellular Component: NELF complex (GO:0032021);; Biological Process: negative regulation of transcription, DNA-templated (GO:0045892);;	K15180|1.54019e-88|oas:101103711|K15180 negative elongation factor B | (RefSeq) NELFB, COBRA1; negative elongation factor complex member B	--	--
gene20947	VPS29	38.3864	2011	33.3102	2249	38.1568	3078	29.9485	2038	32.5826	1752	32.8429	2486	48.8131	1864	50.2311	1949	49.815	1883	34.4613	2729	39.2053	2580	35.3436	2240	0.70445	-0.132749	normal	0.00317291	0.410817	normal	0.991107	-0.0105764	normal	6.83726e-06	0.545724	normal	0.807301	-0.128307	normal	0.00251931	0.417794	normal	[R]	General function prediction only	Molecular Function: phosphoserine phosphatase activity (GO:0004647);; Biological Process: Golgi to vacuole transport (GO:0006896);; Cellular Component: endosome membrane (GO:0010008);; Biological Process: protein transport (GO:0015031);; Molecular Function: metal ion binding (GO:0046872);;	K18467|9.03384e-151|bom:102278347|K18467 vacuolar protein sorting-associated protein 29 | (RefSeq) VPS29; VPS29, retromer complex component	Endocytosis (ko04144)	[U]
gene25986	KCTD13	6.21873	678	6.14244	918	4.15732	668	5.9434	816	6.3084	751	6.09842	1048	7.55958	673	4.09098	366	6.35994	539	7.20726	1294	6.31049	1121	5.99093	898	0.742196	0.222961	normal	0.744417	0.198005	normal	0.428919	0.376154	normal	0.957535	-0.033421	normal	0.675694	-0.188033	normal	0.711144	-0.207663	normal	--	--	Molecular Function: ubiquitin-protein transferase activity (GO:0004842);; Cellular Component: nucleus (GO:0005634);; Biological Process: cell migration (GO:0016477);; Biological Process: protein ubiquitination (GO:0016567);; Molecular Function: GTP-Rho binding (GO:0017049);; Cellular Component: Cul3-RING ubiquitin ligase complex (GO:0031463);; Biological Process: negative regulation of Rho protei…	K15074|0|phd:102321339|K15074 BTB/POZ domain-containing adapter for CUL3-mediated RhoA degradation protein | (RefSeq) KCTD13; potassium channel tetramerization domain containing 13	--	[P]
gene23595	ALDH5A1	12.2606	3084	12.4937	4089	12.053	4804	11.3076	3494	6.75838	1674	11.4533	4284	10.2941	1869	12.7815	2431	8.82844	1639	8.56406	3315	10.926	3530	9.42154	2955	0.716038	-0.246304	normal	0.515858	-0.217345	normal	0.178428	-0.313324	normal	0.938948	0.0513527	normal	0.984075	0.0318717	normal	0.821353	0.0970205	normal	[C]	Energy production and conversion	Molecular Function: succinate-semialdehyde dehydrogenase (NAD+) activity (GO:0004777);; Cellular Component: mitochondrion (GO:0005739);; Biological Process: glucose metabolic process (GO:0006006);; Biological Process: acetate metabolic process (GO:0006083);; Biological Process: succinate metabolic process (GO:0006105);; Biological Process: glutamate metabolic process (GO:0006536);; Biological Pro…	K00139|0|oas:101107828|K00139 succinate-semialdehyde dehydrogenase [EC:1.2.1.24] | (RefSeq) ALDH5A1; aldehyde dehydrogenase 5 family member A1	Alanine, aspartate and glutamate metabolism (ko00250);; Butanoate metabolism (ko00650)	[C]
gene25968	CORO1A	22.0354	2099	17.5676	1974	15.8224	2251	6.9067	768	6.5144	637	11.4717	1443	64.561	3969	27.2348	1830	42.1751	2770	20.7332	2867	14.5955	1650	26.5109	2933	0.000297207	-0.969257	normal	0.00145991	1.05638	up	0.912299	0.117617	normal	1.91789e-11	2.15238	up	0.000515779	-1.03829	down	0.0187267	0.89549	normal	[R]	General function prediction only	Cellular Component: immunological synapse (GO:0001772);; Biological Process: phagolysosome assembly (GO:0001845);; Cellular Component: phagocytic cup (GO:0001891);; Cellular Component: actin filament (GO:0005884);; Biological Process: calcium ion transport (GO:0006816);; Molecular Function: protein C-terminus binding (GO:0008022);; Biological Process: regulation of cell shape (GO:0008360);; Cellu…	K13882|0|oas:101114326|K13882 coronin-1A | (RefSeq) CORO1A; coronin 1A	Phagosome (ko04145);; Tuberculosis (ko05152)	[Z]
gene4910	LOC106990912	0.408138	23	0.364308	26	1.48566	127	1.23036	83	0.863777	48	1.08624	87	1.07841	43	2.03821	84	2.82711	115	0.881032	73	1.08008	75	0.765581	52	0.839625	0.235898	normal	0.201838	0.836194	normal	0.948601	0.103241	normal	0.25243	0.714988	normal	0.895549	0.175372	normal	0.108003	0.843818	normal	--	--	--	--	--	--
gene28768	LOC106990623	0	0	0	0	0	0	0	0	0	0	0	0	0	0	0	0	0	0	0	0	0	0	0	0	--	--	--	--	--	--	--	--	--	--	--	--	--	--	--	--	--	--	--	--	Molecular Function: G-protein coupled receptor activity (GO:0004930);; Molecular Function: olfactory receptor activity (GO:0004984);; Cellular Component: plasma membrane (GO:0005886);; Biological Process: G-protein coupled receptor signaling pathway (GO:0007186);; Cellular Component: integral component of membrane (GO:0016021);; Biological Process: detection of chemical stimulus involved in senso…	K04257|0|oas:106990623|K04257 olfactory receptor | (RefSeq) olfactory receptor 5M9-like	Olfactory transduction (ko04740)	--
gene17066	CSTF1	7.91887	1387	4.81722	1115	7.71892	2097	5.06981	1134	7.83312	1365	4.45569	1180	7.10102	880	7.65137	987	8.59913	1164	4.92308	1362	6.7843	1524	3.52151	758	0.839625	-0.165992	normal	0.739708	0.166944	normal	0.719161	-0.30544	normal	0.293981	0.358898	normal	0.895549	0.154931	normal	0.150751	0.523963	normal	[R]	General function prediction only	--	K14406|0|oas:101119326|K14406 cleavage stimulation factor subunit 1 | (RefSeq) CSTF1; cleavage stimulation factor subunit 1	mRNA surveillance pathway (ko03015)	[A]
gene9627	LOC101103895	0	0	0	0	0	0	0	0	0	0	0	0	0	0	0	0	0	0	0	0	0	0	0	0	--	--	--	--	--	--	--	--	--	--	--	--	--	--	--	--	--	--	--	--	Molecular Function: G-protein coupled receptor activity (GO:0004930);; Molecular Function: olfactory receptor activity (GO:0004984);; Cellular Component: plasma membrane (GO:0005886);; Biological Process: G-protein coupled receptor signaling pathway (GO:0007186);; Cellular Component: integral component of membrane (GO:0016021);; Biological Process: detection of chemical stimulus involved in senso…	K04257|0|oas:101103895|K04257 olfactory receptor | (RefSeq) olfactory receptor 2T27-like	Olfactory transduction (ko04740)	--
gene9128	TMED1	5.62807	477	5.21296	529	5.96236	747	4.19668	363	4.90893	394	5.60825	605	3.76812	230	5.5686	293	6.43541	357	5.96242	717	6.13272	650	6.37387	597	0.571186	-0.257267	normal	0.677903	-0.197	normal	0.889302	0.105397	normal	0.907714	0.0665196	normal	0.292149	-0.366883	normal	0.398368	-0.307668	normal	--	--	Cellular Component: endoplasmic reticulum membrane (GO:0005789);; Cellular Component: Golgi apparatus (GO:0005794);; Cellular Component: plasma membrane (GO:0005886);; Biological Process: protein transport (GO:0015031);; Cellular Component: integral component of membrane (GO:0016021);; Cellular Component: endoplasmic reticulum-Golgi intermediate compartment membrane (GO:0033116);;	K20348|4.61747e-119|oas:101119305|K20348 p24 family protein gamma-1 | (RefSeq) TMED1; transmembrane p24 trafficking protein 1	--	[U]
gene28059	LOC105605576	0	0	0	0	0	0	0	0	0	0	0	0	0	0	0	0	0	0	0	0	0	0	0	0	--	--	--	--	--	--	--	--	--	--	--	--	--	--	--	--	--	--	--	--	Cellular Component: nuclear chromatin (GO:0000790);; Molecular Function: RNA polymerase II core promoter proximal region sequence-specific DNA binding (GO:0000978);; Biological Process: neuron migration (GO:0001764);; Biological Process: regulation of respiratory gaseous exchange by neurological system process (GO:0002087);; Biological Process: noradrenergic neuron differentiation (GO:0003357);; …	K18491|3.64607e-101|oas:105605576|K18491 homeobox protein ESX1 | (RefSeq) rhox homeobox family member 1-like	--	[K]
gene13325	LACTB2	13.5446	1050	14.3229	1413	14.1304	1687	11.6088	1094	16.6184	1296	11.5167	1286	16.2072	902	15.5922	896	18.9698	1078	10.6227	1235	14.6467	1421	11.9867	1128	0.93992	-0.051467	normal	0.22826	0.252175	normal	0.86398	-0.156057	normal	0.316787	0.301819	normal	0.931131	0.0956251	normal	0.11852	0.406706	normal	[R]	General function prediction only	Cellular Component: mitochondrion (GO:0005739);; Molecular Function: hydrolase activity (GO:0016787);; Molecular Function: metal ion binding (GO:0046872);;	--	--	[R]
gene1529	ITLN	0	0	0	0	0	0	0.024036	2	0	0	0	0	0	0	0	0	1.64027	73	0	0	0	0	0	0	0.839625	0.0545101	normal	0.530116	0.319515	normal	--	--	--	0.427325	0.580599	normal	0.895075	0.0520653	normal	0.526656	0.313143	normal	--	--	--	K17527|0|oas:780453|K17527 intelectin | (RefSeq) ITLN; intelectin	--	--
gene25560	HN1L	20.305	4709	20.5214	6060	18.5242	6619	18.3487	5172	21.4623	5007	17.3379	5795	19.3855	3228	17.5068	3009	16.5728	2818	19.1432	6659	19.1559	5561	19.7437	5560	0.958976	-0.0260947	normal	0.450124	-0.162786	normal	0.960415	-0.0296128	normal	0.586126	-0.140602	normal	0.998181	-0.00344721	normal	0.536714	-0.137044	normal	--	--	Cellular Component: cytoplasm (GO:0005737);; Cellular Component: plasma membrane (GO:0005886);;	--	--	--
gene17211	ROMO1	64.428	1506	68.4896	2032	70.1671	2522	71.4168	2025	62.8959	1478	74.6321	2504	44.8007	750	55.6959	966	60.9942	1041	62.1931	2174	72.389	2115	73.3148	2071	0.888349	0.0686096	normal	0.167631	-0.333196	normal	0.970884	0.0313712	normal	0.102319	-0.411594	normal	0.977899	0.0297393	normal	0.162123	-0.366743	normal	--	--	Biological Process: replicative cell aging (GO:0001302);; Cellular Component: mitochondrial inner membrane (GO:0005743);; Biological Process: positive regulation of cell proliferation (GO:0008284);; Cellular Component: integral component of membrane (GO:0016021);; Biological Process: cellular response to reactive oxygen species (GO:0034614);; Biological Process: defense response to bacterium (GO:…	--	--	[S]
Ovis_aries_newGene_60996	--	0.583692	71	0.393162	64	0.589224	116	0.387372	57	0.386546	49	0.386975	73	0.82615	78	0.166436	17	0.569871	51	0.559057	88	0.493144	76	0.279846	42	0.747924	-0.289789	normal	0.994941	0.00825548	normal	0.889302	-0.221618	normal	0.736255	0.311514	normal	0.986601	-0.0350063	normal	0.794855	0.231702	normal	--	--	Cellular Component: voltage-gated sodium channel complex (GO:0001518);; Biological Process: detection of chemical stimulus involved in sensory perception of bitter taste (GO:0001580);; Biological Process: antigen processing and presentation of peptide or polysaccharide antigen via MHC class II (GO:0002504);; Molecular Function: metalloendopeptidase activity (GO:0004222);; Molecular Function: G-pr…	K17086|3.46402e-23|bta:509946|K17086 transmembrane 9 superfamily member 2/4 | (RefSeq) transmembrane 9 superfamily member 2-like	--	--
gene3720	ADAM29	0	0	0	0	0	0	0	0	0	0	0	0	0	0	0	0	0	0	0	0	0	0	0	0	--	--	--	--	--	--	--	--	--	--	--	--	--	--	--	--	--	--	--	--	--	K16069|0|oas:101112201|K16069 disintegrin and metalloproteinase domain-containing protein 29 [EC:3.4.24.-] | (RefSeq) ADAM29; ADAM metallopeptidase domain 29	--	[O]
gene895	STRIP1	9.63315	1699	10.469	2351	9.15249	2487	11.4491	2454	10.3513	1837	10.051	2555	8.89641	1127	8.21505	1074	8.15461	1055	10.9059	2885	9.83253	2171	11.2324	2406	0.734081	0.146822	normal	0.247122	-0.221673	normal	0.848867	0.123425	normal	0.0407243	-0.379209	normal	0.986488	0.0167599	normal	0.0379722	-0.352565	normal	--	--	Cellular Component: nucleus (GO:0005634);; Cellular Component: cytoplasm (GO:0005737);; Biological Process: regulation of cell morphogenesis (GO:0022604);; Biological Process: cortical actin cytoskeleton organization (GO:0030866);;	--	--	[S]
Ovis_aries_newGene_49698	--	0.19349	6	0.162002	6	0.125568	6	0.226301	8	0.194027	8	0.09008	5	0.211171	6	0.425414	12	0.451834	13	0.323376	19	0.236408	9	0.283869	10	0.938421	0.0833952	normal	0.307318	0.733669	normal	0.84434	0.257232	normal	0.48015	0.69462	normal	0.895075	-0.188508	normal	0.754286	0.292789	normal	--	--	Molecular Function: organic cyclic compound binding (GO:0097159);; Molecular Function: heterocyclic compound binding (GO:1901363);;	--	--	--
gene1523	LOC101121646	1.07919	70	1.52614	86	0.366871	99	0.10783	24	0.199919	31	0.118918	30	2.02553	183	0.754874	40	0.69946	71	0.716197	193	0.717407	48	0.66875	127	0.00595942	-1.02176	down	0.320861	0.671621	normal	0.889302	0.230028	normal	0.00144519	1.85309	up	0.0222396	-0.977866	normal	0.740398	0.335076	normal	--	--	Molecular Function: receptor activity (GO:0004872);; Cellular Component: integral component of membrane (GO:0016021);;	K06570|0|oas:101121646|K06570 lymphocyte antigen 9 | (RefSeq) LY9; T-lymphocyte surface antigen Ly-9	--	--
gene8738	SUGP1	10.9394	1968	11.9843	2134	12.554	2646	11.7179	2116	12.932	1589	10.8252	2931	17.3163	1493	12.1839	1296	16.1371	1427	13.1791	2701	12.7184	2274	12.9579	2286	0.965495	0.0278552	normal	0.76	0.0893562	normal	0.959444	0.0370198	normal	0.883737	0.0554599	normal	0.989488	-0.0141891	normal	0.87146	0.0477318	normal	--	--	Molecular Function: RNA binding (GO:0003723);; Cellular Component: nucleus (GO:0005634);; Biological Process: RNA processing (GO:0006396);;	K13096|0|oas:101105072|K13096 splicing factor 4 | (RefSeq) SUGP1; SURP and G-patch domain containing 1	--	[R]
Ovis_aries_newGene_17528	--	0.390219	12	0.170253	7	0.21472	11	0	0	0	0	0	0	1.34151	30	0	0	0.441615	10	0.192449	9	0.052517	3	0.094508	4	0.198433	-0.482587	normal	0.737703	0.314019	normal	0.860122	-0.230325	normal	0.192782	0.929515	normal	0.596742	-0.247866	normal	0.452989	0.510006	normal	--	--	Biological Process: detection of chemical stimulus involved in sensory perception of bitter taste (GO:0001580);; Molecular Function: RNA binding (GO:0003723);; Molecular Function: metalloendopeptidase activity (GO:0004222);; Molecular Function: G-protein coupled receptor activity (GO:0004930);; Molecular Function: ATP binding (GO:0005524);; Cellular Component: extracellular space (GO:0005615);; C…	K17086|9.80315e-22|bta:509946|K17086 transmembrane 9 superfamily member 2/4 | (RefSeq) transmembrane 9 superfamily member 2-like	--	--
gene7241	LOC101120742	0.007101	1	0	0	0	0	0	0	0	0	0	0	0	0	0	0	0	0	0	0	0	0	0	0	--	--	--	--	--	--	--	--	--	--	--	--	--	--	--	--	--	--	--	--	Molecular Function: G-protein coupled receptor activity (GO:0004930);; Cellular Component: integral component of membrane (GO:0016021);; Biological Process: sensory perception of taste (GO:0050909);;	K08474|0|oas:101120742|K08474 taste receptor type 2 | (RefSeq) taste receptor type 2 member 42-like	Taste transduction (ko04742)	--
gene23385	LOC105603939	0	0	0	0	0	0	0	0	0	0	0	0	0	0	0	0	0	0	0	0	0	0	0	0	--	--	--	--	--	--	--	--	--	--	--	--	--	--	--	--	--	--	--	--	Molecular Function: G-protein coupled receptor activity (GO:0004930);; Molecular Function: olfactory receptor activity (GO:0004984);; Cellular Component: plasma membrane (GO:0005886);; Cellular Component: integral component of membrane (GO:0016021);;	K04257|0|oas:105603939|K04257 olfactory receptor | (RefSeq) olfactory receptor 2B2-like	Olfactory transduction (ko04740)	--
gene20086	MS4A2	3.50668	842	1.82715	647	3.08429	1350	1.31544	402	1.32275	374	1.69233	646	6.51259	1204	6.30985	1325	8.53657	1505	2.05916	868	1.68433	525	2.56654	783	0.0115638	-0.772279	normal	5.07256e-06	1.19844	up	0.610827	-0.342723	normal	1.46749e-30	2.15434	up	0.335256	-0.422701	normal	2.13169e-13	1.62026	up	--	--	Cellular Component: integral component of plasma membrane (GO:0005887);; Biological Process: cell surface receptor signaling pathway (GO:0007166);; Cellular Component: external side of plasma membrane (GO:0009897);; Molecular Function: IgE binding (GO:0019863);; Cellular Component: Fc-epsilon receptor I complex (GO:0032998);;	K08090|7.75155e-146|oas:443203|K08090 membrane-spanning 4-domains, subfamily A, member 2 | (RefSeq) MS4A2, FCER1B; membrane spanning 4-domains A2	Sphingolipid signaling pathway (ko04071);; Phospholipase D signaling pathway (ko04072);; Fc epsilon RI signaling pathway (ko04664);; Asthma (ko05310)	--
gene27276	REPS2	0.749652	403	1.02026	689	0.571761	471	0.593329	386	0.780565	420	0.716759	552	0.429915	166	0.615269	248	0.542492	213	0.571781	459	0.736547	491	0.520248	340	0.89238	-0.112855	normal	0.241345	-0.498993	normal	0.769421	-0.276662	normal	0.238019	-0.409804	normal	0.874172	0.185592	normal	0.737701	-0.191672	normal	--	--	--	K20068|0|oas:101107070|K20068 RalBP1-associated Eps domain-containing protein | (RefSeq) REPS2; RALBP1 associated Eps domain containing 2	--	[U]
gene26445	EXOC8	1.41961	330	1.4774	437	1.38874	497	1.41714	400	0.893259	209	1.06794	357	0.95184	159	1.69812	292	1.06706	182	1.19484	416	1.47476	429	1.77375	500	0.695219	-0.259623	normal	0.740203	-0.195437	normal	0.97194	0.0456359	normal	0.923444	0.0750166	normal	0.754365	-0.29542	normal	0.717302	-0.241928	normal	--	--	Molecular Function: phospholipid binding (GO:0005543);; Cellular Component: nucleus (GO:0005634);; Cellular Component: cytoplasm (GO:0005737);; Biological Process: exocytosis (GO:0006887);; Biological Process: protein transport (GO:0015031);; Cellular Component: growth cone (GO:0030426);;	K19986|0|oas:101113907|K19986 exocyst complex component 8 | (RefSeq) EXOC8; exocyst complex component 8	--	[U]
gene11226	PARP16	7.82977	844	8.99584	1286	9.92961	1725	8.37271	1141	9.283	1035	8.33302	1351	7.51436	610	8.65788	722	10.7758	895	5.5874	918	9.2952	1265	8.9305	1157	0.994183	-0.00603534	normal	0.973142	0.0176461	normal	0.889302	-0.170096	normal	0.967506	0.0192213	normal	0.895075	0.166787	normal	0.728391	0.200026	normal	--	--	Molecular Function: NAD+ ADP-ribosyltransferase activity (GO:0003950);;	K00774|0|oas:101119477|K00774 poly [ADP-ribose] polymerase 16 [EC:2.4.2.30] | (RefSeq) PARP16; poly(ADP-ribose) polymerase family member 16	--	--
gene6561	LRRK2	3.3736	1659	3.43781	2129	3.70426	2799	2.69457	1608	3.5501	1728	2.70971	1920	4.05007	1388	4.25601	1548	4.56304	1644	3.17369	2338	2.93724	1797	2.76188	1650	0.578341	-0.198666	normal	0.139417	0.262911	normal	0.304826	-0.231063	normal	0.0164882	0.465475	normal	0.983511	0.022582	normal	0.00128091	0.494299	normal	[K]	Transcription	Biological Process: activation of MAPKK activity (GO:0000186);; Molecular Function: GTPase activity (GO:0003924);; Molecular Function: MAP kinase kinase activity (GO:0004708);; Molecular Function: GTPase activator activity (GO:0005096);; Molecular Function: ATP binding (GO:0005524);; Molecular Function: GTP binding (GO:0005525);; Cellular Component: trans-Golgi network (GO:0005802);; Cellular Com…	K08844|0|oas:101111447|K08844 leucine-rich repeat kinase 2 [EC:2.7.11.1] | (RefSeq) LRRK2; leucine rich repeat kinase 2	Parkinson's disease (ko05012)	--
gene17815	CMTM3	18.5607	3474	9.06139	1922	18.4099	4963	8.0618	1617	12.1007	1596	14.2713	3574	22.4999	2398	17.9451	1168	31.8822	2627	22.0649	4931	18.8852	2721	20.7519	4060	0.463075	-0.432444	normal	0.97494	0.0268517	normal	0.961453	0.0749856	normal	0.245823	0.554211	normal	0.180409	-0.558895	normal	0.929614	-0.0663135	normal	--	--	Cellular Component: integral component of membrane (GO:0016021);;	--	--	[V]
gene7567	DESI1	19.341	3120	19.9707	4101	17.1529	4262	18.3765	3603	18.4361	2991	18.1326	4215	20.0081	2317	16.0471	1918	16.1319	1907	20.5842	4980	24.0188	4849	22.7119	4448	0.9871	-0.0088557	normal	0.707847	-0.125892	normal	0.372683	0.241883	normal	0.679309	-0.12253	normal	0.238591	-0.260775	normal	0.0643382	-0.377141	normal	--	--	--	--	--	[S]
Ovis_aries_newGene_4443	--	0.210689	9	0.101801	6	0.167923	11	0.569184	28	0.356987	15	0.18638	11	0.350006	11	0.079737	3	0	0	0.105014	7	0.231572	12	0.149247	8	0.622019	0.383668	normal	0.974397	-0.0323376	normal	0.999938	0.000873779	normal	0.63556	-0.523887	normal	0.7209	0.365247	normal	0.972953	-0.0325878	normal	--	--	Molecular Function: actin binding (GO:0003779);; Molecular Function: RNA-directed DNA polymerase activity (GO:0003964);; Molecular Function: phospholipid binding (GO:0005543);; Cellular Component: proteinaceous extracellular matrix (GO:0005578);; Cellular Component: plasma membrane (GO:0005886);; Biological Process: RNA-dependent DNA biosynthetic process (GO:0006278);; Cellular Component: anchore…	K08111|3.89109e-14|bom:102284894|K08111 glypican 5 | (RefSeq) GPC5, Glypican-5; glypican 5	--	--
gene23566	LOC101112606	0	0	2.83314	267	2.33358	266	0	0	0	0	1.33911	143	5.87428	312	0	0	1.58499	86	0	0	0	0	0	0	0.908999	-0.0402336	normal	0.949667	0.0408328	normal	0.889302	-0.0726082	normal	0.784637	0.171037	normal	0.895075	0.0662384	normal	0.702206	0.177473	normal	--	--	Cellular Component: nucleosome (GO:0000786);; Molecular Function: DNA binding (GO:0003677);; Cellular Component: nucleolus (GO:0005730);; Biological Process: nucleosome assembly (GO:0006334);; Cellular Component: actin cytoskeleton (GO:0015629);; Biological Process: negative regulation of megakaryocyte differentiation (GO:0045653);; Molecular Function: protein heterodimerization activity (GO:0046…	K11254|7.94727e-51|dse:Dsec_GM19606|K11254 histone H4 | (RefSeq) GM19606 gene product from transcript GM19606-RA	--	[B]
gene10858	NUP54	10.9126	1350	9.37071	1604	7.22493	1894	6.57621	1420	7.68676	1244	7.49678	1665	8.62449	1039	7.62605	964	9.0461	949	7.77395	1884	10.7481	1704	9.09918	1451	0.839625	-0.0765506	normal	0.836513	0.0583601	normal	0.992769	-0.00794842	normal	0.589159	0.132749	normal	0.895549	-0.0746619	normal	0.822288	0.0629624	normal	--	--	--	K14308|0|oas:101109017|K14308 nuclear pore complex protein Nup54 | (RefSeq) NUP54; nucleoporin 54	RNA transport (ko03013)	[YU]
gene24748	SLC25A28	23.4588	2263	18.0955	2325	12.4193	2023	24.046	2827	15.3265	1346	11.3705	2008	22.4944	1626	11.0548	800	23.4714	1744	11.7833	1992	12.7095	1675	12.5679	1607	0.96536	-0.0444857	normal	0.943022	0.0556558	normal	0.375546	-0.374087	normal	0.885545	0.105778	normal	0.657757	0.312543	normal	0.316673	0.443239	normal	--	--	Cellular Component: mitochondrion (GO:0005739);; Biological Process: transport (GO:0006810);; Cellular Component: integral component of membrane (GO:0016021);;	K15113|0|oas:101110892|K15113 solute carrier family 25 (mitochondrial iron transporter), member 28/37 | (RefSeq) SLC25A28; solute carrier family 25 member 28	--	[C]
gene19355	LOC101115822	0	0	0	0	0	0	0.068813	4	0	0	0	0	0	0	0	0	0	0	0	0	0	0	0	0	0.839625	0.0613984	normal	--	--	--	--	--	--	0.705886	-0.208774	normal	0.895075	0.0584282	normal	--	--	--	--	--	Molecular Function: G-protein coupled receptor activity (GO:0004930);; Molecular Function: olfactory receptor activity (GO:0004984);; Cellular Component: plasma membrane (GO:0005886);; Cellular Component: integral component of membrane (GO:0016021);;	K04257|0|oas:101115822|K04257 olfactory receptor | (RefSeq) olfactory receptor 2AG2-like	Olfactory transduction (ko04740)	--
gene20638	LOC105602726	0.900922	116	1.46414	120	1.7936	221	0.738848	116	1.2841	124	0.63384	167	1.56119	165	1.54018	194	1.41572	127	1.37313	188	3.49386	199	0.798753	161	0.964453	-0.0455279	normal	0.0320613	0.792833	normal	0.889302	0.183671	normal	0.010459	0.885463	normal	0.808746	-0.250033	normal	0.112164	0.589674	normal	[R]	General function prediction only	--	K14347|5.82467e-119|oas:105602726|K14347 solute carrier family 10 (sodium/bile acid cotransporter), member 7 | (RefSeq) sodium/bile acid cotransporter 7	--	[R]
gene19403	LOC101115569	0	0	0	0	0	0	0	0	0	0	0	0	0	0	0	0	0	0	0	0	0	0	0	0	--	--	--	--	--	--	--	--	--	--	--	--	--	--	--	--	--	--	--	--	--	K04257|0|oas:101115569|K04257 olfactory receptor | (RefSeq) olfactory receptor 52E8	Olfactory transduction (ko04740)	--
gene9652	SHC2	1.08347	110	1.47841	187	2.06165	317	0.97998	117	1.30358	130	1.54768	219	0.664482	57	1.0349	77	1.349	102	1.231	184	1.14619	142	1.73852	209	0.839625	-0.202479	normal	0.455441	-0.447185	normal	0.919759	-0.12816	normal	0.705251	-0.246323	normal	0.967924	-0.0725412	normal	0.66306	-0.304913	normal	--	--	Biological Process: intracellular signal transduction (GO:0035556);;	K17447|0|oas:101113847|K17447 SHC-transforming protein 2 | (RefSeq) SHC2; SHC adaptor protein 2	EGFR tyrosine kinase inhibitor resistance (ko01521);; Endocrine resistance (ko01522);; ErbB signaling pathway (ko04012);; Ras signaling pathway (ko04014);; Chemokine signaling pathway (ko04062);; Phospholipase D signaling pathway (ko04072);; VEGF signaling pathway (ko04370);; Focal adhesion (ko04510);; Natural killer cell mediated cytotoxicity (ko04650);; Neurotrophin signaling pathway (ko04722);…	[T]
gene26870	SPCS3	22.3474	4113	19.3752	4540	18.8313	5339	16.8321	3765	21.0575	3899	17.3551	4603	14.7352	1947	19.3929	2645	19.5069	2632	15.7209	4340	21.4729	4946	17.7546	3968	0.839625	-0.100579	normal	0.590868	-0.182199	normal	0.889302	-0.126093	normal	0.802473	-0.0856543	normal	0.983577	0.0234114	normal	0.914321	-0.0518512	normal	--	--	Cellular Component: signal peptidase complex (GO:0005787);; Biological Process: signal peptide processing (GO:0006465);; Biological Process: proteolysis (GO:0006508);; Molecular Function: peptidase activity (GO:0008233);; Cellular Component: integral component of membrane (GO:0016021);;	K12948|2.16305e-127|oas:101105386|K12948 signal peptidase complex subunit 3 [EC:3.4.-.-] | (RefSeq) SPCS3; signal peptidase complex subunit 3	Protein export (ko03060)	[U]
gene20083	LOC101114467	0	0	0	0	0	0	0	0	0	0	0	0	0	0	0	0	0	0	0	0	0	0	0	0	--	--	--	--	--	--	--	--	--	--	--	--	--	--	--	--	--	--	--	--	--	--	--	--
gene2356	OTOL1	0	0	0	0	0	0	0	0	0.022143	3	0	0	0.031026	3	0	0	0	0	0.044503	7	0	0	0	0	0.839625	0.059862	normal	0.739708	0.134426	normal	0.889302	0.0501351	normal	0.96004	0.0381985	normal	0.983502	-0.0141509	normal	0.985615	-0.00819774	normal	--	--	Cellular Component: collagen trimer (GO:0005581);;	--	--	--
gene5726	REL	5.47853	546	4.36734	596	4.20721	680	3.262	409	4.35453	454	2.53426	393	8.24041	591	6.01654	432	3.90167	290	3.7905	621	3.24899	444	3.26634	426	0.390276	-0.373713	normal	0.656475	0.261292	normal	0.292773	-0.339933	normal	0.117882	0.664982	normal	0.971701	-0.0540576	normal	0.13388	0.592379	normal	--	--	Molecular Function: transcription factor activity, sequence-specific DNA binding (GO:0003700);; Cellular Component: nucleus (GO:0005634);; Cellular Component: cytoplasm (GO:0005737);; Biological Process: positive regulation of I-kappaB kinase/NF-kappaB signaling (GO:0043123);; Biological Process: positive regulation of interleukin-12 biosynthetic process (GO:0045084);; Biological Process: positiv…	K09254|0|oas:101118600|K09254 c-Rel proto-oncogene protein | (RefSeq) REL; REL proto-oncogene, NF-kB subunit	Ras signaling pathway (ko04014);; Transcriptional misregulation in cancer (ko05202);; Viral carcinogenesis (ko05203)	--
Ovis_aries_newGene_40038	--	0	0	0	0	0.091762	2	0	0	0	0	0	0	0	0	0	0	0	0	0.49435	11	0	0	0	0	0.842559	-0.0509136	normal	0.780897	-0.0960612	normal	0.917114	0.040368	normal	--	--	--	0.895075	-0.0620669	normal	0.740997	-0.130629	normal	--	--	--	--	--	--
gene19828	MAPK8IP1	3.01648	321	3.76931	527	2.99945	506	3.3036	440	2.65864	277	3.85808	566	1.9341	149	1.84189	145	2.52183	195	3.08422	484	3.11104	407	3.44319	458	0.993826	-0.00926432	normal	0.0327842	-0.63587	normal	0.96941	-0.045883	normal	0.065797	-0.640579	normal	0.983577	0.0297233	normal	0.0424901	-0.593734	normal	--	--	Molecular Function: MAP-kinase scaffold activity (GO:0005078);; Cellular Component: cytosol (GO:0005829);; Biological Process: regulation of transcription, DNA-templated (GO:0006355);; Biological Process: JUN phosphorylation (GO:0007258);; Cellular Component: membrane (GO:0016020);; Biological Process: vesicle-mediated transport (GO:0016192);; Molecular Function: kinesin binding (GO:0019894);; Mo…	K04434|0|oas:101116934|K04434 mitogen-activated protein kinase 8 interacting protein 1 | (RefSeq) MAPK8IP1; mitogen-activated protein kinase 8 interacting protein 1	MAPK signaling pathway (ko04010)	[T]
gene2842	CNTRL	7.18301	2655	6.45884	3524	6.84056	4192	5.29516	3058	7.48512	2904	7.70777	4371	12.9118	2803	10.1084	2215	10.262	1958	6.08336	4429	5.21748	3229	11.3633	3442	0.839625	0.0760312	normal	0.527465	0.207737	normal	0.948601	0.0387575	normal	0.708236	0.129792	normal	0.972242	0.0304497	normal	0.680006	0.163902	normal	[K]	Transcription	Cellular Component: centrosome (GO:0005813);;	K16770|0|chx:102184149|K16770 centriolin | (RefSeq) CNTRL; centriolin	--	--
gene22021	LOC106991749	3.85952	187	4.31235	263	3.94429	285	5.19815	318	4.4938	227	4.90915	339	2.90698	104	3.21988	121	3.85528	144	3.73281	276	4.1923	248	3.74171	226	0.429172	0.316591	normal	0.706282	-0.196802	normal	0.986444	-0.0222323	normal	0.118794	-0.541685	normal	0.4509	0.332213	normal	0.740546	-0.176926	normal	--	--	Biological Process: cellular amino acid metabolic process (GO:0006520);;	--	--	--
gene8258	RNF148	0.013283	3	0.021586	7	0.08293	29	0.060246	17	0.040889	10	0.060385	20	0.02552	5	0	0	0.018747	4	0.042693	15	0.083827	24	0.048988	14	0.89466	0.135445	normal	0.739708	-0.288947	normal	0.907777	0.130921	normal	0.455663	-0.727826	normal	0.989203	-0.0293031	normal	0.453695	-0.557044	normal	[O]	Posttranslational modification, protein turnover, chaperones	Molecular Function: zinc ion binding (GO:0008270);; Cellular Component: integral component of membrane (GO:0016021);;	--	--	[O]
Ovis_aries_newGene_25088	--	0.476476	26	0.482768	34	0.512241	43	0.482623	32	0.278498	16	0.049738	4	0.301305	12	0.229225	10	0.165205	7	0.296694	25	0.371754	26	0.459228	31	0.812395	-0.264769	normal	0.317242	-0.684338	normal	0.889302	-0.193936	normal	0.927445	-0.127426	normal	0.928867	-0.137681	normal	0.653229	-0.4147	normal	--	--	--	--	--	--
gene11364	SLC22A17	3.41626	905	3.52641	1121	3.79001	1443	3.11711	944	3.07687	713	4.04198	1414	2.39402	455	2.39033	476	3.42641	636	3.83377	1352	3.37478	1080	3.76005	1158	0.854002	-0.101128	normal	0.203964	-0.344986	normal	0.999127	-0.0011082	normal	0.551554	-0.244851	normal	0.899555	-0.105519	normal	0.224865	-0.346741	normal	--	--	Molecular Function: transmembrane signaling receptor activity (GO:0004888);; Cellular Component: vacuolar membrane (GO:0005774);; Cellular Component: integral component of plasma membrane (GO:0005887);; Biological Process: ion transport (GO:0006811);; Biological Process: siderophore transport (GO:0015891);; Molecular Function: transmembrane transporter activity (GO:0022857);; Cellular Component: …	K08213|0|chx:102182411|K08213 MFS transporter, OCT family, solute carrier family 22 (organic cation transporter), member 17 | (RefSeq) SLC22A17; solute carrier family 22 member 17	--	[R]
gene26278	LOC106991895	0	0	0	0	0	0	0	0	0	0	0	0	0	0	0	0	0	0	0	0	0	0	0	0	--	--	--	--	--	--	--	--	--	--	--	--	--	--	--	--	--	--	--	--	--	--	--	--
gene14892	DLX4	3.70817	602	3.91297	866	3.32849	858	2.87764	479	2.82549	409	1.85587	419	1.74137	189	1.54622	131	2.10791	222	2.75186	560	2.15615	384	1.93008	350	0.0115638	-0.646633	normal	6.14004e-06	-1.22091	down	2.19338e-05	-0.828665	normal	0.153651	-0.565972	normal	0.895075	0.167878	normal	0.41788	-0.365197	normal	--	--	Molecular Function: transcription factor activity, sequence-specific DNA binding (GO:0003700);; Cellular Component: nucleus (GO:0005634);; Molecular Function: sequence-specific DNA binding (GO:0043565);;	K09314|4.7679e-131|oas:101109628|K09314 homeobox protein DLX1/4/6 | (RefSeq) DLX4; distal-less homeobox 4	--	[K]
Ovis_aries_newGene_54877	--	0.576161	27	0.279631	17	0.055107	4	0.123598	8	0.463275	22	0.132976	9	0.06795	3	0.273865	10	0	0	0.243493	18	0.289289	17	0.177758	11	0.947677	-0.069799	normal	0.722441	-0.316804	normal	0.963238	-0.0680074	normal	0.726113	-0.36956	normal	0.998663	-0.00319281	normal	0.744989	-0.283745	normal	--	--	--	--	--	--
gene21668	NOVA1	1.40061	434	0.604189	353	0.641976	554	0.298443	237	0.694628	356	0.550365	389	1.11521	297	1.24626	484	0.91486	364	0.993555	714	0.879725	607	0.92845	531	0.670899	-0.296804	normal	0.226484	0.483265	normal	0.495966	0.332572	normal	0.0176666	0.837753	normal	0.040846	-0.647894	normal	0.775035	0.133328	normal	--	--	Molecular Function: RNA binding (GO:0003723);;	K14944|2.98421e-163|oas:101114392|K14944 RNA-binding protein Nova | (RefSeq) NOVA1; NOVA alternative splicing regulator 1	--	[AR]
Ovis_aries_newGene_42797	--	0.022549	5	0.106398	25	0.225484	63	0.12838	28	0.105801	20	0.159781	42	0.178189	23	0.030427	5	0	0	0.336841	91	0.065636	15	0.243641	53	0.963776	0.0556522	normal	0.810881	-0.207575	normal	0.889302	0.210212	normal	0.697794	-0.421488	normal	0.883829	-0.271652	normal	0.539418	-0.477524	normal	--	--	Biological Process: nucleotide-excision repair, DNA damage recognition (GO:0000715);; Cellular Component: voltage-gated sodium channel complex (GO:0001518);; Molecular Function: damaged DNA binding (GO:0003684);; Molecular Function: single-stranded DNA binding (GO:0003697);; Molecular Function: voltage-gated sodium channel activity (GO:0005248);; Cellular Component: nucleolus (GO:0005730);; Cellu…	K10838|1.05179e-09|oas:101109650|K10838 xeroderma pigmentosum group C-complementing protein | (RefSeq) XPC; XPC complex subunit, DNA damage recognition and repair factor	Nucleotide excision repair (ko03420)	--
gene26171	COL26A1	3.80728	439	1.72935	195	1.90984	274	1.70907	160	1.76562	182	3.03912	395	0.791428	73	1.04249	62	2.12026	147	2.01718	262	1.85317	212	1.24232	131	0.839625	-0.224094	normal	0.229789	-0.733628	normal	0.558158	-0.439994	normal	0.395067	-0.559378	normal	0.837565	0.286096	normal	0.796441	-0.19531	normal	--	--	Cellular Component: proteinaceous extracellular matrix (GO:0005578);; Cellular Component: endoplasmic reticulum (GO:0005783);; Cellular Component: Golgi apparatus (GO:0005794);; Biological Process: positive regulation of cell-substrate adhesion (GO:0010811);;	--	--	--
gene8123	HOXA2	0.733352	187	0.536806	212	1.22986	453	0.996553	282	0.72579	227	0.770528	345	1.18875	237	1.08662	185	1.11802	216	0.646734	301	1.09073	347	1.03515	305	0.903071	0.109268	normal	0.465765	0.36945	normal	0.912299	0.128473	normal	0.494601	0.264635	normal	0.981348	-0.0362359	normal	0.660296	0.22233	normal	--	--	Biological Process: negative regulation of transcription from RNA polymerase II promoter (GO:0000122);; Biological Process: cell fate determination (GO:0001709);; Biological Process: osteoblast development (GO:0002076);; Molecular Function: transcription factor activity, sequence-specific DNA binding (GO:0003700);; Cellular Component: nucleus (GO:0005634);; Biological Process: segment specificati…	K09302|0|oas:101106161|K09302 homeobox protein HoxA/B2 | (RefSeq) HOXA2; homeobox A2	--	[R]
Ovis_aries_newGene_45504	--	0.917902	113	1.29885	204	1.0029	187	0.946822	141	1.40065	174	1.31203	227	0.927421	82	0.865639	80	0.994118	91	1.01599	188	0.959221	149	0.758127	114	0.839625	0.163128	normal	0.748348	-0.183961	normal	0.889302	-0.173457	normal	0.419251	-0.382666	normal	0.630426	0.339052	normal	0.985384	0.0123503	normal	--	--	--	--	--	[R]
gene21354	ARRDC4	21.4715	4538	24.6322	6504	22.6354	7198	22.9891	5641	17.6769	3642	19.6805	5907	31.228	4613	27.7036	4280	32.8263	5005	19.5032	5964	20.5463	5441	21.5204	5493	0.730347	-0.166682	normal	0.00892399	0.387305	normal	0.71712	-0.14795	normal	0.00587937	0.555423	normal	0.980153	-0.0284927	normal	0.000419999	0.532712	normal	--	--	--	--	--	[R]
Ovis_aries_newGene_46267	--	0	0	0	0	0	0	0	0	0	0	0.121402	23	0	0	0	0	0	0	0	0	0	0	0	0	0.838088	0.0871323	normal	--	--	--	--	--	--	0.692173	-0.247919	normal	0.895075	0.0836708	normal	--	--	--	--	--	Molecular Function: actin binding (GO:0003779);; Molecular Function: RNA-directed DNA polymerase activity (GO:0003964);; Molecular Function: receptor binding (GO:0005102);; Molecular Function: phospholipid binding (GO:0005543);; Cellular Component: proteinaceous extracellular matrix (GO:0005578);; Cellular Component: mitochondrion (GO:0005739);; Cellular Component: peroxisome (GO:0005777);; Cellu…	K08111|8.10785e-15|bom:102284894|K08111 glypican 5 | (RefSeq) GPC5, Glypican-5; glypican 5	--	--
gene25182	CCDC178	0	0	0	0	0	0	0	0	0.009866	2	0	0	0	0	0	0	0	0	0	0	0.008588	3	0	0	0.839625	0.0556421	normal	--	--	--	0.889302	0.045935	normal	0.732983	-0.18085	normal	0.993097	-0.00630397	normal	0.760387	-0.108503	normal	--	--	--	--	--	--
gene2525	RASA2	18.1027	6518	18.5274	8519	12.2086	6792	11.1439	4864	17.389	6325	12.2044	6429	14.8554	3832	14.4646	3810	13.916	3482	11.6508	6185	11.9663	5396	16.7932	7436	0.777333	-0.20391	normal	0.57117	-0.21476	normal	0.816501	-0.228008	normal	0.991993	0.00486413	normal	0.985568	0.0267873	normal	0.939778	0.0385427	normal	--	--	Molecular Function: GTPase activator activity (GO:0005096);; Molecular Function: phospholipid binding (GO:0005543);; Cellular Component: intracellular membrane-bounded organelle (GO:0043231);; Biological Process: regulation of small GTPase mediated signal transduction (GO:0051056);;	K08053|0|oas:101108362|K08053 Ras GTPase-activating protein 2 | (RefSeq) RASA2; RAS p21 protein activator 2	MAPK signaling pathway (ko04010);; Ras signaling pathway (ko04014);; Viral carcinogenesis (ko05203)	[T]
gene9747	CDKN2AIPNL	19.1161	1446	14.3318	1576	17.3786	2146	19.9444	1651	19.1803	1593	18.6873	2111	19.9402	1182	18.3247	1304	22.6679	1296	16.6616	2120	19.772	1924	17.467	1627	0.743746	0.133893	normal	0.063983	0.322331	normal	0.90573	0.0710099	normal	0.347316	0.182703	normal	0.936033	0.0557826	normal	0.171987	0.245636	normal	--	--	--	--	--	--
Ovis_aries_newGene_16509	--	1.39921	352	0	0	0	0	0	0	0.647085	164	0.674224	245	0.957636	173	0	0	0.80471	149	0	0	0	0	0	0	0.995932	-0.0018749	normal	0.975801	0.0153288	normal	0.889302	-0.0554254	normal	0.957535	0.0531363	normal	0.895075	0.0869546	normal	0.676651	0.196938	normal	--	--	--	--	--	--
gene19445	LOC101121453	0	0	0.033441	3	0	0	0	0	0	0	0	0	0	0	0	0	0	0	0	0	0	0	0	0	0.839625	-0.0575568	normal	0.758791	-0.112942	normal	0.889302	-0.0462397	normal	--	--	--	--	--	--	--	--	--	--	--	Molecular Function: G-protein coupled receptor activity (GO:0004930);; Molecular Function: olfactory receptor activity (GO:0004984);; Cellular Component: plasma membrane (GO:0005886);; Biological Process: G-protein coupled receptor signaling pathway (GO:0007186);; Cellular Component: integral component of membrane (GO:0016021);; Biological Process: detection of chemical stimulus involved in senso…	K04257|0|oas:101121453|K04257 olfactory receptor | (RefSeq) olfactory receptor 51I2-like	Olfactory transduction (ko04740)	--
gene16528	RBM17	13.3033	2310	14.2019	2910	13.3142	3546	11.633	2489	2.53713	489	14.9151	3146	8.73439	1094	13.3627	1727	14.6639	1776	13.6638	3594	12.7209	2711	14.3968	3040	0.839625	-0.231376	normal	0.744417	-0.141575	normal	0.958104	0.0348511	normal	0.706137	0.292366	normal	0.895075	-0.241992	normal	0.709546	-0.179188	normal	--	--	Molecular Function: nucleotide binding (GO:0000166);; Molecular Function: nucleic acid binding (GO:0003676);; Cellular Component: nucleus (GO:0005634);;	K12840|0|phd:102324242|K12840 splicing factor 45 | (RefSeq) RBM17; RNA binding motif protein 17	Spliceosome (ko03040)	[A]
gene20111	SPZ1	0	0	0	0	0	0	0	0	0	0	0	0	0	0	0	0	0	0	0	0	0	0	0	0	--	--	--	--	--	--	--	--	--	--	--	--	--	--	--	--	--	--	--	--	Molecular Function: DNA binding (GO:0003677);; Cellular Component: nucleus (GO:0005634);; Cellular Component: cytoplasm (GO:0005737);; Biological Process: regulation of transcription, DNA-templated (GO:0006355);;	K17482|0|oas:101103424|K17482 spermatogenic leucine zipper protein 1 | (RefSeq) SPZ1; spermatogenic leucine zipper 1	--	--
gene22084	GADL1	0.048004	8	0.067453	15	0.010529	3	0.092572	19	0.076204	13	0.017311	5	0.086475	11	1.02432	27	0.372285	21	0.037028	10	0.059206	13	0.029739	6	0.8835	0.137279	normal	0.182591	0.883021	normal	0.997091	0.00602701	normal	0.37327	0.798895	normal	0.913961	0.149576	normal	0.0945156	1.01458	normal	[E]	Amino acid transport and metabolism	Molecular Function: carboxy-lyase activity (GO:0016831);; Biological Process: carboxylic acid metabolic process (GO:0019752);; Molecular Function: pyridoxal phosphate binding (GO:0030170);;	K18966|0|oas:101110627|K18966 sulfinoalanine decarboxylase / aspartate 1-decarboxylase [EC:4.1.1.29 4.1.1.11] | (RefSeq) GADL1; glutamate decarboxylase like 1	beta-Alanine metabolism (ko00410);; Taurine and hypotaurine metabolism (ko00430);; Pantothenate and CoA biosynthesis (ko00770)	[E]
Ovis_aries_newGene_35652	--	0	0	0	0	0.106301	10	0	0	0.255562	16	0	0	0	0	0	0	0	0	0.668727	62	0.405602	31	0.120599	9	0.926227	0.0395216	normal	0.740203	-0.134596	normal	0.472889	0.321048	normal	0.692173	-0.247297	normal	0.796659	-0.217041	normal	0.0117683	-1.30866	down	--	--	Cellular Component: integral component of membrane (GO:0016021);;	--	--	--
gene23370	ZSCAN16	1.48123	740	1.80096	1384	2.49601	2114	3.2826	1560	2.71126	1649	3.82968	1827	1.46999	583	2.55017	1033	1.58732	451	1.7287	1548	2.37726	1490	2.87807	1036	0.460903	0.353925	normal	0.813396	-0.163655	normal	0.975961	-0.0458913	normal	0.173512	-0.570394	normal	0.159549	0.422537	normal	0.856052	-0.121857	normal	[R]	General function prediction only	Molecular Function: nucleic acid binding (GO:0003676);; Molecular Function: transcription factor activity, sequence-specific DNA binding (GO:0003700);; Cellular Component: nucleus (GO:0005634);; Biological Process: transcription, DNA-templated (GO:0006351);; Molecular Function: metal ion binding (GO:0046872);;	K09230|0|oas:101104351|K09230 SCAN domain-containing zinc finger protein | (RefSeq) ZSCAN16; zinc finger and SCAN domain containing 16	--	[R]
gene2687	LOC105604729	1.04499	19	0.850766	20	1.53266	42	0.864598	19	1.79449	32	1.88736	49	6.41	82	2.32065	31	2.31582	30	2.09401	56	1.81259	41	4.1987	91	0.839625	0.205364	normal	0.0634987	1.06684	normal	0.313687	0.5686	normal	0.204645	0.920452	normal	0.685464	-0.408925	normal	0.767525	0.262197	normal	[F]	Nucleotide transport and metabolism	Molecular Function: ion channel activity (GO:0005216);; Molecular Function: manganese ion transmembrane transporter activity (GO:0005384);; Cellular Component: plasma membrane (GO:0005886);; Cellular Component: integral component of membrane (GO:0016021);; Molecular Function: hydrolase activity (GO:0016787);; Biological Process: response to hydroperoxide (GO:0033194);;	--	--	[P]
gene9170	PEX11G	2.72221	150	2.94352	207	2.39885	223	2.63399	188	2.56798	144	2.6195	217	1.65064	74	1.81143	73	2.74676	125	2.86672	265	3.12652	220	2.22779	160	0.996726	0.0035084	normal	0.668064	-0.274274	normal	0.954227	0.0706702	normal	0.639751	-0.294037	normal	0.958245	-0.0740577	normal	0.568401	-0.343583	normal	--	--	Cellular Component: integral component of peroxisomal membrane (GO:0005779);; Biological Process: peroxisome fission (GO:0016559);; Cellular Component: protein complex (GO:0043234);; Biological Process: regulation of peroxisome size (GO:0044375);;	K13353|2.21017e-173|oas:101122599|K13353 peroxin-11C | (RefSeq) PEX11G; peroxisomal biogenesis factor 11 gamma	Peroxisome (ko04146)	[U]
gene22137	XYLB	7.21332	1523	5.40562	1716	7.11726	2024	7.29559	1677	12.6244	1946	7.26145	1920	5.44197	744	6.19953	710	5.77644	602	7.90282	2105	10.6727	2213	6.95671	1473	0.803154	0.160387	normal	0.00301023	-0.567361	normal	0.95092	0.0614682	normal	0.00136445	-0.742197	normal	0.939083	0.0884728	normal	0.0104049	-0.623612	normal	[G]	Carbohydrate transport and metabolism	Molecular Function: xylulokinase activity (GO:0004856);; Molecular Function: ATP binding (GO:0005524);; Biological Process: xylulose metabolic process (GO:0005997);; Biological Process: D-xylose metabolic process (GO:0042732);;	K00854|0|oas:101116261|K00854 xylulokinase [EC:2.7.1.17] | (RefSeq) XYLB; xylulokinase	Pentose and glucuronate interconversions (ko00040)	[G]
gene14263	MED13	13.1333	6868	13.0806	8709	12.2801	9807	10.7789	6851	13.1064	6812	9.80516	7390	12.7592	4790	13.1001	5040	11.326	4290	12.095	9394	11.8091	7645	10.5154	6677	0.68732	-0.15976	normal	0.785973	-0.0682747	normal	0.557862	-0.161216	normal	0.745339	0.0927306	normal	0.995328	-0.00746968	normal	0.740546	0.091875	normal	--	--	Molecular Function: RNA polymerase II transcription cofactor activity (GO:0001104);; Molecular Function: transcription coactivator activity (GO:0003713);; Molecular Function: receptor activity (GO:0004872);; Biological Process: transcription initiation from RNA polymerase II promoter (GO:0006367);; Cellular Component: mediator complex (GO:0016592);; Biological Process: androgen receptor signaling…	K15164|0|chx:102189706|K15164 mediator of RNA polymerase II transcription subunit 13 | (RefSeq) MED13; mediator complex subunit 13	Thyroid hormone signaling pathway (ko04919)	[K]
gene5225	RC3H2	5.86937	1764	7.53392	2828	5.92189	2693	6.55014	2335	7.56134	2410	3.01813	2013	4.32883	1016	5.37276	1247	4.25916	975	5.46404	2872	5.3281	2162	4.29083	1811	0.9836	0.0185994	normal	0.147916	-0.370926	normal	0.881112	-0.14509	normal	0.232065	-0.395549	normal	0.895075	0.151542	normal	0.465222	-0.222415	normal	--	--	Molecular Function: DNA binding (GO:0003677);; Molecular Function: zinc ion binding (GO:0008270);; Cellular Component: cell surface (GO:0009986);; Cellular Component: membrane (GO:0016020);;	K15690|0|oas:101110920|K15690 RING finger and CCCH-type zinc finger domain-containing protein | (RefSeq) RC3H2; ring finger and CCCH-type domains 2	--	[O]
gene23852	FAM181B	0.606775	54	0.328731	37	0.442625	61	0.672547	73	0.865985	77	0.510458	65	0.381159	25	0.230708	16	0.399995	26	0.571831	76	0.154706	18	0.43632	47	0.638065	0.38144	normal	0.737794	-0.31129	normal	0.94893	-0.102209	normal	0.160861	-0.85367	normal	0.667402	0.418889	normal	0.907832	-0.123401	normal	--	--	--	--	--	--
gene24660	TNKS2	9.22653	6474	9.61879	8593	9.25275	10002	9.3898	6778	11.2756	6031	11.0532	8036	8.54012	4302	15.043	5329	11.1635	4637	10.7481	9588	9.12693	8015	8.38884	7147	0.313675	-0.168933	normal	0.926487	-0.0287663	normal	0.889302	-0.0747299	normal	0.56212	0.136474	normal	0.824805	-0.100111	normal	0.889402	0.0425315	normal	[D]	Cell cycle control, cell division, chromosome partitioning	Biological Process: protein polyubiquitination (GO:0000209);; Cellular Component: pericentriolar material (GO:0000242);; Molecular Function: NAD+ ADP-ribosyltransferase activity (GO:0003950);; Cellular Component: nuclear envelope (GO:0005635);; Molecular Function: enzyme binding (GO:0019899);; Biological Process: regulation of multicellular organism growth (GO:0040014);; Cellular Component: perin…	K10799|0|oas:101103938|K10799 tankyrase [EC:2.4.2.30] | (RefSeq) TNKS2; tankyrase 2	--	[M]
gene16903	CENPB	0	0	0	0	0	0	0	0	0	0	0	0	0	0	0	0	0	0	0	0	0	0	0	0	--	--	--	--	--	--	--	--	--	--	--	--	--	--	--	--	--	--	--	--	Cellular Component: chromosome, centromeric region (GO:0000775);; Molecular Function: DNA binding (GO:0003677);; Molecular Function: chromatin binding (GO:0003682);; Cellular Component: nucleus (GO:0005634);; Biological Process: regulation of transcription, DNA-templated (GO:0006355);;	K11496|0|oas:443351|K11496 centromere protein B | (RefSeq) CENPB, CENP-B; centromere protein B	--	[BD]
gene28324	DRP2	0.865631	359	0.812263	416	1.19595	651	0.758491	358	1.05516	409	0.910294	504	1.02753	234	1.53918	273	1.14064	307	1.33596	632	1.31534	573	0.71878	375	0.948481	-0.0480431	normal	0.987939	-0.00880807	normal	0.937884	0.0848521	normal	0.944	0.0382593	normal	0.895075	-0.138431	normal	0.836558	-0.103955	normal	--	--	Molecular Function: calcium ion binding (GO:0005509);; Cellular Component: plasma membrane (GO:0005886);; Molecular Function: zinc ion binding (GO:0008270);;	--	--	[NTZ]
gene20037	LPXN	3.6029	531	2.74092	485	2.74565	596	1.34704	211	1.33669	218	1.89845	430	6.73832	698	3.3409	330	4.54258	417	2.6902	575	2.21094	415	2.77843	451	0.0275203	-0.728345	normal	0.268421	0.518845	normal	0.784764	-0.220882	normal	0.000450525	1.3442	up	0.173186	-0.533369	normal	0.0531024	0.743683	normal	--	--	Cellular Component: podosome (GO:0002102);; Molecular Function: transcription cofactor activity (GO:0003712);; Cellular Component: nucleus (GO:0005634);; Cellular Component: cytoplasm (GO:0005737);; Cellular Component: plasma membrane (GO:0005886);; Cellular Component: focal adhesion (GO:0005925);; Biological Process: negative regulation of cell adhesion (GO:0007162);; Molecular Function: zinc io…	--	--	[TZ]
gene9382	LOC101123039	0.05522	5	0.114559	11	0.31867	17	0.07607	6	0.102884	7	0.337752	12	0.106619	5	0.342142	11	0.091977	3	0.011104	4	0.092713	4	0.173542	6	0.942302	-0.0831699	normal	0.986157	0.0216693	normal	0.796288	-0.269683	normal	0.901743	0.163007	normal	0.895075	0.222978	normal	0.610998	0.441122	normal	[JO]	Translation, ribosomal structure and biogenesis;; Posttranslational modification, protein turnover, chaperones	Molecular Function: procollagen-proline 4-dioxygenase activity (GO:0004656);; Molecular Function: iron ion binding (GO:0005506);; Cellular Component: endoplasmic reticulum (GO:0005783);; Molecular Function: oxidoreductase activity, acting on single donors with incorporation of molecular oxygen, incorporation of two atoms of oxygen (GO:0016702);; Molecular Function: L-ascorbic acid binding (GO:003…	K00472|0|oas:101123039|K00472 prolyl 4-hydroxylase [EC:1.14.11.2] | (RefSeq) prolyl 4-hydroxylase subunit alpha-2-like	Arginine and proline metabolism (ko00330)	[E]
gene26528	FAM13C	10.4501	1786	7.48804	1637	13.473	3537	7.16221	1482	9.07605	1660	6.495	1627	12.2688	1340	7.82548	1011	12.8006	1577	9.84266	2734	8.67621	1828	8.54566	1751	0.504496	-0.33969	normal	0.987095	-0.0116061	normal	0.889302	-0.153614	normal	0.281266	0.368824	normal	0.802469	-0.202106	normal	0.740546	0.156937	normal	--	--	--	--	--	--
gene17418	PARD6B	7.12155	1374	8.78915	2227	7.12874	2141	7.78178	1854	7.78089	1513	7.35163	1975	6.38318	890	6.22569	916	7.49048	1078	7.38428	2209	8.73389	2161	7.20535	1703	0.994183	-0.00605742	normal	0.527233	-0.201467	normal	0.981195	0.0267522	normal	0.4209	-0.203394	normal	0.96776	-0.0400949	normal	0.370394	-0.233764	normal	--	--	Cellular Component: nucleus (GO:0005634);; Cellular Component: plasma membrane (GO:0005886);; Cellular Component: bicellular tight junction (GO:0005923);; Cellular Component: cell cortex (GO:0005938);; Biological Process: protein complex assembly (GO:0006461);; Cellular Component: apical part of cell (GO:0045177);;	K06093|0|oas:101118720|K06093 partitioning defective protein 6 | (RefSeq) PARD6B; par-6 family cell polarity regulator beta	Rap1 signaling pathway (ko04015);; Endocytosis (ko04144);; Axon guidance (ko04360);; Hippo signaling pathway (ko04390);; Tight junction (ko04530)	[T]
gene3046	ROR2	3.92435	1052	3.15075	1268	4.44124	1623	3.5097	1262	4.2621	1340	3.63182	1606	4.6884	430	2.99854	305	3.45566	548	3.25745	1526	4.3095	1244	2.91247	1105	0.589959	0.184079	normal	0.00608359	-0.776464	normal	0.889302	-0.0814429	normal	0.000437534	-0.985486	normal	0.397477	0.257464	normal	0.0188049	-0.697019	normal	--		Biological Process: cartilage condensation (GO:0001502);; Biological Process: somitogenesis (GO:0001756);; Molecular Function: transmembrane receptor protein tyrosine kinase activity (GO:0004714);; Molecular Function: frizzled binding (GO:0005109);; Molecular Function: ATP binding (GO:0005524);; Biological Process: protein phosphorylation (GO:0006468);; Biological Process: transmembrane receptor …	K05123|0|oas:101109779|K05123 receptor tyrosine kinase-like orphan receptor 2 [EC:2.7.10.1] | (RefSeq) ROR2; receptor tyrosine kinase like orphan receptor 2	--	[TU]
gene17562	WFDC1	25.2511	1842	28.8286	2653	28.3427	3189	22.3069	1984	24.0299	1741	24.1418	2456	22.969	1234	20.5102	1118	33.8252	1778	34.2708	3713	25.803	2307	31.6352	2835	0.339183	-0.206938	normal	0.835743	-0.0958734	normal	0.880218	0.139104	normal	0.798971	0.104557	normal	0.197993	-0.347494	normal	0.591238	-0.239781	normal	--	--	Cellular Component: extracellular region (GO:0005576);; Biological Process: negative regulation of peptidase activity (GO:0010466);; Molecular Function: peptidase inhibitor activity (GO:0030414);;	--	--	--
Ovis_aries_newGene_27134	--	0.27831	38	0.246524	42	0.458793	95	0.624153	101	0.236501	32	0.13045	26	0.041956	5	0.174843	18	0.639656	63	0.406201	51	0.425305	58	0.196688	32	0.987608	0.0209404	normal	0.932797	-0.0959144	normal	0.889302	-0.173384	normal	0.914182	-0.144298	normal	0.928222	0.148606	normal	0.95977	0.055469	normal	--	--	--	--	--	--
Ovis_aries_newGene_8363	--	0	0	0.1485	17	0.309934	23	0.583178	55	1.38701	107	0.263656	32	0.095858	3	0.343109	20	0	0	0.479365	62	0.235715	18	0.127639	14	0.204749	0.585036	normal	0.979624	0.0226029	normal	0.873177	0.197965	normal	0.166944	-1.12779	normal	0.503992	0.487841	normal	0.740546	-0.301193	normal	--	--	Molecular Function: nucleotide binding (GO:0000166);; Cellular Component: cyclin-dependent protein kinase holoenzyme complex (GO:0000307);; Biological Process: detection of chemical stimulus involved in sensory perception of bitter taste (GO:0001580);; Biological Process: acrosome assembly (GO:0001675);; Biological Process: positive regulation of protein phosphorylation (GO:0001934);; Biological …	K08474|1.90363e-16|bta:664647|K08474 taste receptor type 2 | (RefSeq) T2R65A; bitter taste receptor Bota-T2R65A	--	--
gene1403	INSRR	0.009147	4	0.009563	5	0.01024	6	0.015077	7	0.011713	4	0.011484	6	0.001501	1	0.02027	5	0.063372	16	0.018176	10	0.013918	6	0.022432	9	0.951269	0.0630318	normal	0.633083	0.413152	normal	0.889302	0.155232	normal	0.693796	0.44673	normal	0.950309	-0.107178	normal	0.813817	0.210558	normal	--		Molecular Function: transmembrane receptor protein tyrosine kinase activity (GO:0004714);; Molecular Function: ATP binding (GO:0005524);; Biological Process: transmembrane receptor protein tyrosine kinase signaling pathway (GO:0007169);; Cellular Component: integral component of membrane (GO:0016021);; Biological Process: male sex determination (GO:0030238);; Biological Process: actin cytoskeleto…	K05086|0|oas:101108266|K05086 insulin receptor-related receptor [EC:2.7.10.1] | (RefSeq) INSRR; insulin receptor related receptor	Regulation of actin cytoskeleton (ko04810);; Prostate cancer (ko05215)	[T]
gene19724	ARL14EP	9.95419	866	12.1453	1298	10.2246	1357	10.9793	1001	10.1191	894	10.4546	1310	13.1721	799	12.7129	835	12.6463	819	10.0723	1310	8.89226	960	9.757	1045	0.929982	-0.0464377	normal	0.211252	0.257677	normal	0.860754	-0.135065	normal	0.0778106	0.30411	normal	0.895075	0.0844743	normal	0.0206891	0.394195	normal	--	--	Cellular Component: cytoplasm (GO:0005737);;	--	--	[S]
Ovis_aries_newGene_35508	--	0	0	0	0	0	0	0.315666	6	0.415477	6	0.102581	2	0	0	0.103545	2	0	0	0	0	0.061307	2	0.053927	1	0.515975	0.257685	normal	0.740203	0.126548	normal	0.889302	0.0460182	normal	0.651578	-0.422926	normal	0.794626	0.212536	normal	0.986554	0.00789858	normal	--	--	Molecular Function: nucleic acid binding (GO:0003676);; Molecular Function: transcription factor activity, sequence-specific DNA binding (GO:0003700);; Molecular Function: RNA-directed DNA polymerase activity (GO:0003964);; Cellular Component: intracellular (GO:0005622);; Biological Process: RNA-dependent DNA biosynthetic process (GO:0006278);; Biological Process: regulation of transcription, DNA…	--	--	[R]
gene21536	TRPM1	0.486453	323	0.326214	227	0.36322	370	1.42391	722	1.0451	692	0.649134	620	0.047548	21	0.303487	149	0.081534	40	0.135494	125	0.161156	124	0.121997	90	0.00110044	0.992972	normal	0.178201	-0.861853	normal	7.79893e-05	-1.13266	down	0.000193358	-2.03949	down	1.13768e-24	2.30041	up	0.940975	0.0831883	normal	--	--	Molecular Function: cation channel activity (GO:0005261);; Biological Process: signal transduction (GO:0007165);; Biological Process: visual perception (GO:0007601);; Cellular Component: integral component of membrane (GO:0016021);; Cellular Component: new growing cell tip (GO:0035841);; Biological Process: retinal rod cell development (GO:0046548);; Biological Process: cellular response to light…	K04976|0|oas:101118732|K04976 transient receptor potential cation channel subfamily M member 1 | (RefSeq) TRPM1; transient receptor potential cation channel subfamily M member 1	--	[PT]
gene7069	CAPRIN2	2.92692	605	2.5963	687	3.05479	941	2.9055	725	2.98178	635	3.49188	995	2.52119	370	2.9217	434	3.49074	532	2.43861	728	2.67431	701	2.82134	669	0.754012	0.148924	normal	0.934468	0.0404498	normal	0.889302	-0.12596	normal	0.761779	-0.11611	normal	0.449215	0.268005	normal	0.717721	0.164395	normal	--	--	--	K18744|0|oas:101109694|K18744 caprin-2 | (RefSeq) CAPRIN2; caprin family member 2	--	--
[truncated: 26,706 more rows]
[truncated: 7 more columns]
